# Supplementary material for: Box-copper catalyzed cascade asymmetric amidation for chiral exo-methylene aminoindoline derivatives
Source: Royal Society of Chemistry journal article supplement (doi:10.1039/d1ob01242h), 2021-01-01
Supplement: d1ob01242h1.pdf [file d1ob01242h1.pdf]

## Supporting Information

### Box-Copper Catalyzed Cascade Asymmetric Amidation for Chiral *exo*-Methylene Aminoindoline Derivatives

Xiao-Peng Yang, Hao-Peng Lv, Hao-Di Yang, Bai-Lin Wang and Xing-Wang Wang\*

*Key Laboratory of Organic Synthesis of Jiangsu Province, College of Chemistry, Chemical Engineering and Materials Science, Soochow University, Suzhou 215123, the People's Republic of China*

*Fax: +86-512-65882916*

*E-mail: wangxw@suda.edu.cn*

### Contents

|                                                                              |    |
|------------------------------------------------------------------------------|----|
| 1. General methods and materials .....                                       | 1  |
| 2. Preparation of ethynyl benzoxazinanes and $\alpha$ -halohydroxamates..... | 2  |
| 3. Optimization of reaction conditions.....                                  | 2  |
| 4. General procedure for preparation of <b>3</b> .....                       | 7  |
| 5. Characterization data of products <b>3</b> .....                          | 8  |
| 6. Scale-up synthesis and further transformations of the adducts .....       | 17 |
| 7. X-Ray data of <b>3g</b> .....                                             | 19 |
| 8. NMR spectra .....                                                         | 21 |
| 9. HPLC analysis.....                                                        | 43 |
| 10. References.....                                                          | 58 |

---

## 1. General methods and materials

Unless otherwise stated, all reactions were carried out under an atmosphere of nitrogen in oven-dried glasswares with magnetic stirring. All reagents obtained from commercial suppliers were used without further purification. Some commonly used solvents for asymmetric catalysis were dried with different drying agents through standard methods reported, including of toluene, methylene chloride (DCM), tetrahydrofuran (THF) as well as fluorobenzene. All other reaction media were used as obtained unless otherwise noted. Flash Chromatography was performed with silica gel (300–400 mesh) from Yantai Chemical Industry Research Institute, P. R. China. Analytical thin-layer chromatography (TLC) was performed with 0.2 ± 0.03 mm coated commercial silica gel plates (GF-254, particle size 0.04–0.05 mm). The <sup>1</sup>H and <sup>13</sup>C NMR spectra were recorded in CDCl<sub>3</sub> on Varian Inova (400 MHz and 100 MHz, respectively) spectrometer. Chemical shifts ( $\delta$  ppm) are relative to the resonance of the deuterated solvent as the internal standard (CDCl<sub>3</sub>,  $\delta$  7.26 ppm for proton NMR,  $\delta$  77.10 ppm for carbon NMR). The <sup>1</sup>H NMR data were reported as follows: chemical shift ( $\delta$ , ppm), multiplicity (s = singlet, d = doublet, q = quartet, m = multiplet, td = triplet of doublets, dt = doublet of triplets, dd = doublet of doublets), coupling constants (*J*) and assignment. The data for <sup>13</sup>C NMR are reported in terms of chemical shift ( $\delta$ , ppm). The IR spectra were recorded on a Varian 1000 FT-IR spectrometer. High-resolution mass spectra (HRMS) for all the compounds were determined on Micromass GCT-TOF mass spectrometer with ESI resource. High performance liquid chromatography (HPLC) was performed on an Agilent 1200 Series chromatographs using CHIRALCEL IA-H column. The X-ray data were recorded on a Rigaku Mercury CCD/AFC diffractometer. Optical rotations were reported as follows:  $[\alpha]_D^{20}$  (c in g per 100 mL, solvent).

## 2. Preparation of ethynyl benzoxazinones and $\alpha$ -halohydroxamates

The substrates **1** were prepared according to the reported procedures<sup>1</sup>. The substrates **2** were synthesized according to the literatures<sup>2</sup>.

## 3. Optimization of reaction conditions

**Table S1** Screening of amine and amide substrates<sup>a</sup>

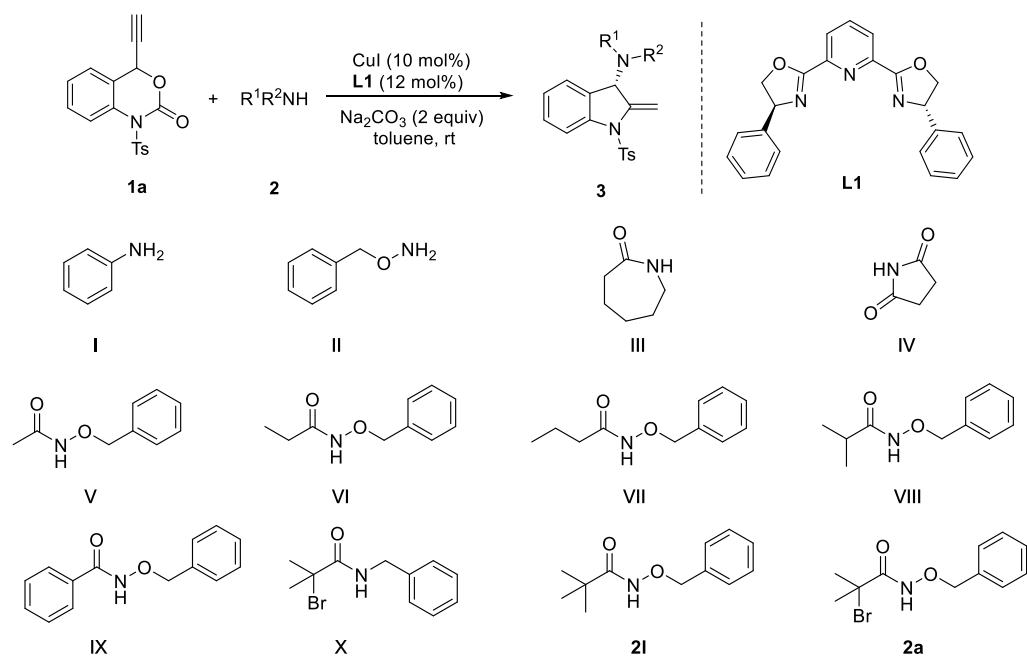

| entry | R <sup>1</sup> R <sup>2</sup> NH | t (h) | yield (%) <sup>b</sup> | ee (%) <sup>c</sup> |
|-------|----------------------------------|-------|------------------------|---------------------|
| 1     | <b>I</b>                         | 14    | 69                     | 0                   |
| 2     | <b>II</b>                        | 14    | 73                     | 0                   |
| 3     | <b>III</b>                       | 14    | 72                     | 0                   |
| 4     | <b>IV</b>                        | 14    | 60                     | 0                   |
| 5     | <b>V</b>                         | 14    | 70                     | 4                   |
| 6     | <b>VI</b>                        | 14    | 58                     | 23                  |
| 7     | <b>VII</b>                       | 14    | --                     | --                  |
| 8     | <b>VIII</b>                      | 14    | 56                     | 0                   |
| 9     | <b>IX</b>                        | 14    | 60                     | 0                   |
| 10    | <b>X</b>                         | 14    | --                     | --                  |

|    |           |    |    |    |
|----|-----------|----|----|----|
| 11 | <b>2l</b> | 14 | 38 | 45 |
| 12 | <b>2a</b> | 14 | 52 | 50 |

<sup>a</sup> Reaction conditions: **1a** (0.1 mmol, 1.0 equiv), **2a** (0.2 mol, 2.0 equiv), CuI (0.01 mmol, 10 mol %), **L1** (0.012 mmol, 12 mol %), Na<sub>2</sub>CO<sub>3</sub> (0.2 mmol, 2.0 equiv), toluene (2 mL), 25 °C, 14 h. <sup>b</sup> Isolated yield. <sup>c</sup> Determined by HPLC.

**Table S2** Screening of chiral ligands <sup>a</sup>

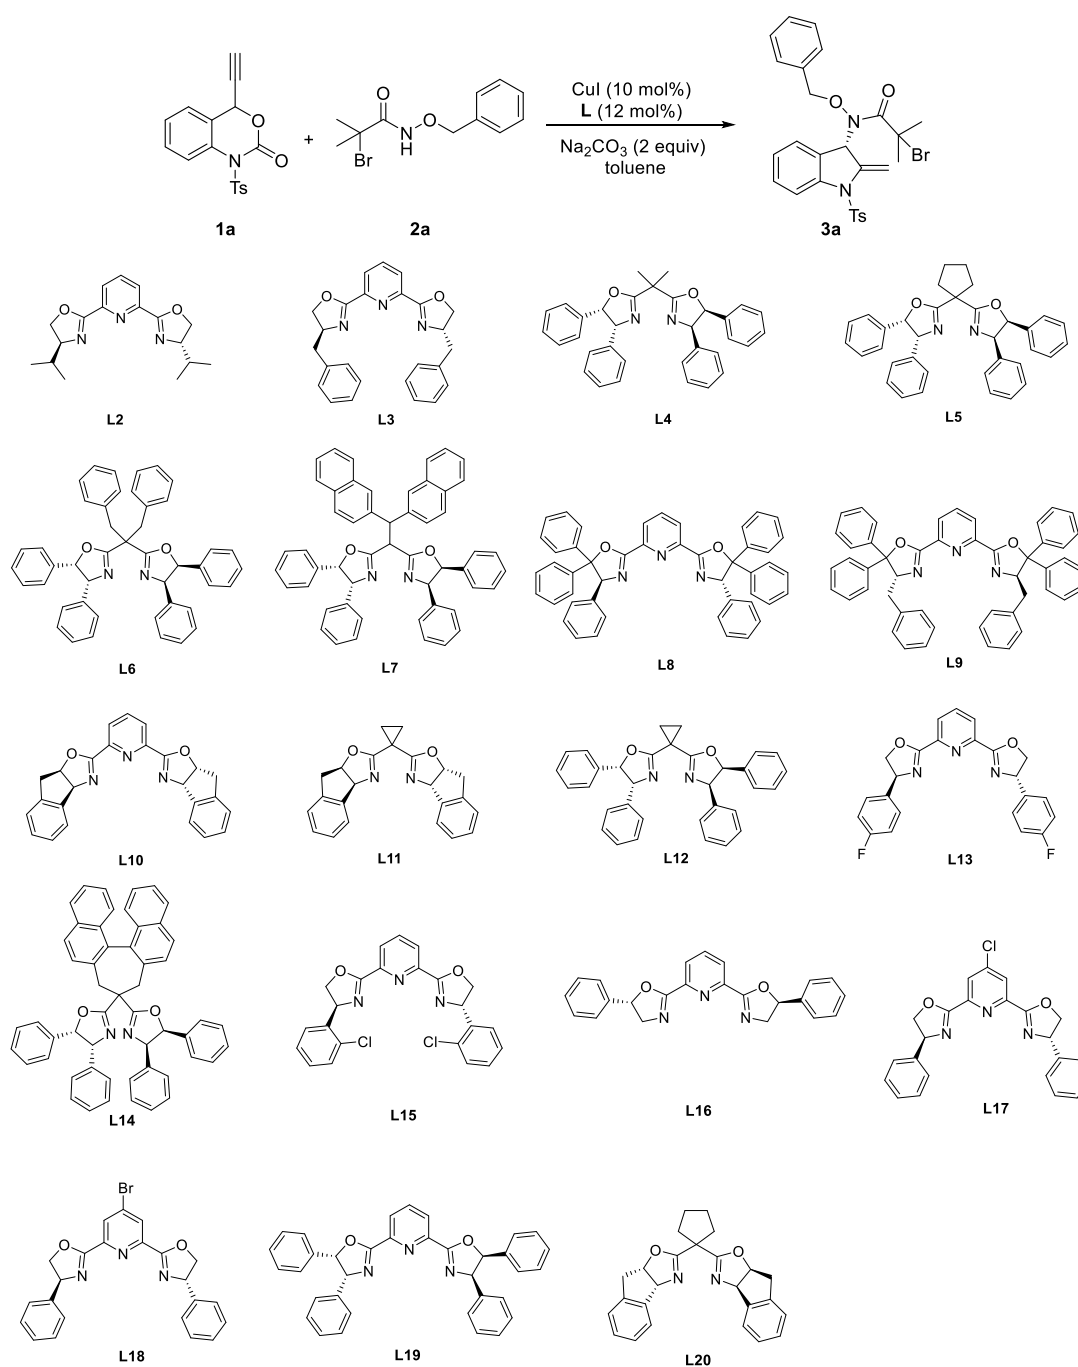

| entry | ligand     | yield (%) <sup>b</sup> | ee (%) <sup>c</sup> |
|-------|------------|------------------------|---------------------|
| 1     | <b>L2</b>  | 43                     | 29                  |
| 2     | <b>L3</b>  | 47                     | 46                  |
| 3     | <b>L4</b>  | 38                     | 30                  |
| 4     | <b>L5</b>  | 29                     | 20                  |
| 5     | <b>L6</b>  | trace                  | N.D.                |
| 6     | <b>L7</b>  | 31                     | 14                  |
| 7     | <b>L8</b>  | 44                     | 42                  |
| 8     | <b>L9</b>  | 52                     | <i>ent</i> -60      |
| 9     | <b>L10</b> | 62                     | 77                  |
| 10    | <b>L11</b> | 54                     | 50                  |
| 11    | <b>L12</b> | 31                     | 14                  |
| 12    | <b>L13</b> | 43                     | 20                  |
| 13    | <b>L14</b> | trace                  | N.D.                |
| 14    | <b>L15</b> | 30                     | 37                  |
| 15    | <b>L16</b> | trace                  | N.D.                |
| 16    | <b>L17</b> | trace                  | N.D.                |
| 17    | <b>L18</b> | 32                     | 37                  |
| 18    | <b>L19</b> | trace                  | N.D.                |
| 19    | <b>L20</b> | 51                     | <i>ent</i> -42      |

<sup>a</sup> Reaction conditions: **1a** (0.1 mmol, 1.0 equiv), **2a** (0.2 mol, 2.0 equiv), CuI (0.01 mmol, 10 mol %), **L** (0.012 mmol, 12 mol %), Na<sub>2</sub>CO<sub>3</sub> (0.2 mmol, 2.0 equiv), toluene (2 mL), 25 °C, 14 h. <sup>b</sup> Isolated yield. <sup>c</sup> Determined by HPLC.

**Table S3** Screening of metal salts <sup>a</sup>

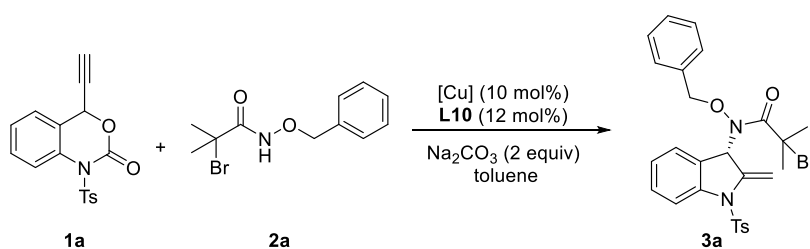

| entry | metal                                               | yield (%) <sup>b</sup> | ee (%) <sup>c</sup> |
|-------|-----------------------------------------------------|------------------------|---------------------|
| 1     | CuCl                                                | 50                     | 72                  |
| 2     | CuBr                                                | 52                     | 76                  |
| 3     | CuCN                                                | 41                     | 66                  |
| 4     | CuSCN                                               | 45                     | 70                  |
| 5     | Cu(CH <sub>3</sub> CN) <sub>4</sub> PF <sub>6</sub> | 51                     | 72                  |
| 6     | Cu(CH <sub>3</sub> CN) <sub>4</sub> BF <sub>4</sub> | 52                     | 76                  |
| 7     | Cu(CH <sub>3</sub> COO) <sub>2</sub>                | 30                     | 71                  |
| 8     | Cu(OTf) <sub>2</sub>                                | 40                     | 36                  |
| 9     | Cu(acac) <sub>2</sub>                               | 45                     | 74                  |
| 10    | Zn(OTf) <sub>2</sub>                                | -                      | -                   |

<sup>a</sup> Reaction conditions: **1a** (0.1 mmol, 1.0 equiv), **2a** (0.2 mol, 2.0 equiv), metal (0.01 mmol, 10 mol %), **L10** (0.012 mmol, 12 mol %), Na<sub>2</sub>CO<sub>3</sub> (0.2 mmol, 2.0 equiv) in toluene (2 mL) at 25 °C for 14 h. <sup>b</sup> Isolated yield. <sup>c</sup> Determined by HPLC.

**Table S4** Screening of bases<sup>a</sup>

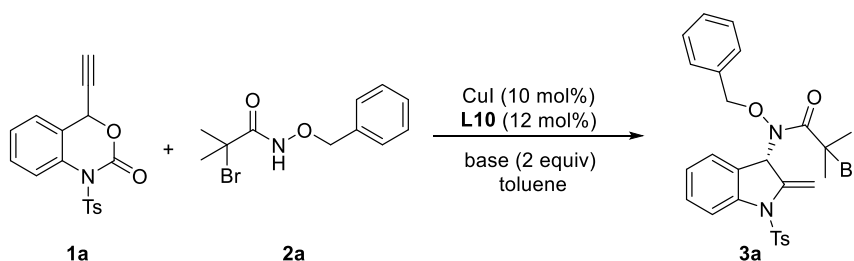

| entry | base                             | yield (%) <sup>b</sup> | ee (%) <sup>c</sup> |
|-------|----------------------------------|------------------------|---------------------|
| 1     | K <sub>2</sub> CO <sub>3</sub>   | 43                     | 62                  |
| 2     | Cs <sub>2</sub> CO <sub>3</sub>  | 32                     | 78                  |
| 3     | NaHCO <sub>3</sub>               | 45                     | 80                  |
| 4     | KHCO <sub>3</sub>                | 63                     | 90                  |
| 5     | Na <sub>2</sub> HPO <sub>4</sub> | 45                     | 76                  |
| 6     | DIPEA                            | 48                     | 76                  |
| 7     | Et <sub>3</sub> N                | 28                     | 50                  |

|                 |                   |    |    |
|-----------------|-------------------|----|----|
| 8               | DBU               | -  | -  |
| 9               | DMAP              | -  | -  |
| 10 <sup>d</sup> | KHCO <sub>3</sub> | 54 | 90 |
| 11 <sup>e</sup> | KHCO <sub>3</sub> | 38 | 90 |

<sup>a</sup> Reaction conditions: **1a** (0.1 mmol, 1.0 equiv), **2a** (0.2 mol, 2.0 equiv), CuI (0.01 mmol, 10 mol %), **L10** (0.012 mmol, 12 mol %), base (2 equiv) in toluene (2 mL) at 25°C for 14 h. <sup>b</sup> Isolated yield. <sup>c</sup> Determined by HPLC analysis. <sup>d</sup> 3.0 equiv of KHCO<sub>3</sub> was used. <sup>e</sup> 1.0 equiv of KHCO<sub>3</sub> was used.

**Table S5** Screening of solvents and reaction temperature <sup>a</sup>

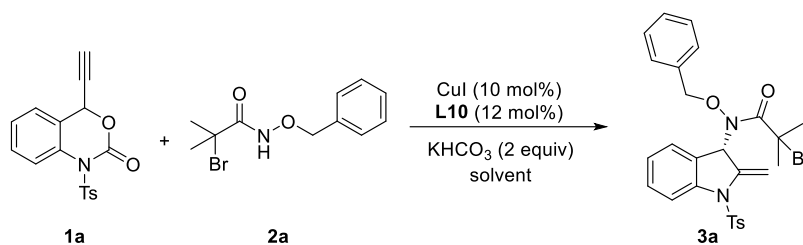

| entry | solvent            | T (°C) | yield (%) <sup>b</sup> | ee (%) <sup>c</sup> |
|-------|--------------------|--------|------------------------|---------------------|
| 1     | DCM                | 25     | -                      | -                   |
| 2     | THF                | 25     | -                      | -                   |
| 3     | CH <sub>3</sub> CN | 25     | 47                     | 54                  |
| 4     | Acetone            | 25     | 57                     | 36                  |
| 5     | m-Xylene           | 25     | 55                     | 77                  |
| 6     | p-Xylene           | 25     | 59                     | 82                  |
| 7     | Fluorobenzene      | 25     | 49                     | 72                  |
| 8     | Toluene            | 40     | 63                     | 82                  |
| 9     | Toluene            | 10     | 33                     | 90                  |

<sup>a</sup> Reaction conditions: **1a** (0.1 mmol, 1.0 equiv), **2a** (0.2 mol, 2.0 equiv), CuI (0.01 mmol, 10 mol %), **L10** (0.012 mmol, 12 mol %), KHCO<sub>3</sub> (2 equiv) in solvent (2 mL) at 25°C for 14 h. <sup>b</sup> Isolated yield. <sup>c</sup> Determined by HPLC analysis.

**Table S6** Screening of additives <sup>a</sup>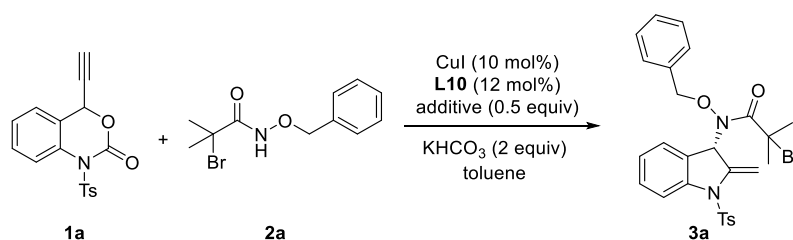

| entry           | additive           | yield (%) <sup>b</sup> | ee (%) <sup>c</sup> |
|-----------------|--------------------|------------------------|---------------------|
| 1               | TBAB               | trace                  | --                  |
| 2               | AgSbF <sub>6</sub> | trace                  | --                  |
| 3               | KBF <sub>4</sub>   | trace                  | --                  |
| 4               | KOAc               | 45                     | 80                  |
| 5               | NaHPO <sub>4</sub> | 39                     | 75                  |
| 6               | 3 Å MS             | trace                  | --                  |
| 7               | 4 Å MS             | 43                     | 78                  |
| 8               | 5 Å MS             | trace                  | --                  |
| 9 <sup>d</sup>  | --                 | 62                     | 80                  |
| 10 <sup>e</sup> | --                 | 70                     | 90                  |
| 11 <sup>f</sup> | --                 | 47                     | 88                  |

<sup>a</sup> Reaction conditions: **1a** (0.1 mmol, 1.0 equiv), **2a** (0.2 mol, 2.0 equiv), CuI (0.01 mmol, 10 mol %), **L10** (0.012 mmol, 12 mol %), K<sub>2</sub>CO<sub>3</sub> (2 equiv), additive (0.5 equiv) in toluene (2 mL) at 25°C for 14 h. <sup>b</sup> Isolated yield. <sup>c</sup> Determined by HPLC analysis. <sup>d</sup> 24h. <sup>e</sup> CuI (5 mol%), **L10** (6 mol%) was added. <sup>f</sup> CuI (2.5 mol%), **L10** (3 mol%) was added.

#### 4. General procedure for preparation of **3**

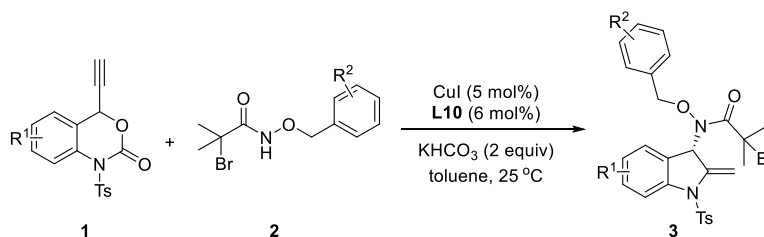

To an oven-dried schlenk tube, CuI (1.0 mg, 0.005 mmol, 5 mol%) and **L10** (2.4 mg, 0.006 mmol, 6 mol%) in dry toluene (2.0 mL) were added under a nitrogen atmosphere. The resulting



mixture was stirred at room temperature for 0.5 hours. Then the substrates **1** (0.1 mmol, 1.0 equiv) and **2** (0.2 mmol, 2.0 equiv) was introduced into the vessel. The mixture was stirred for 12 – 20 hours at 25 °C (monitored by TLC analysis) and then it was subjected to silica gel column to afford the desired products **3**.

### 5. Characterization data of products **3**

#### (*S*)-*N*-(Benzyloxy)-2-bromo-2-methyl-*N*-(2-methylene-1-tosylindolin-3-yl)propanamide (**3a**)

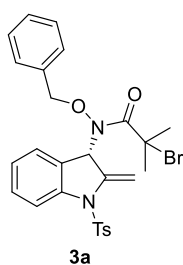

Flash column chromatography eluent petroleum ether/ethyl acetate = 20/1; yellow oil; 70% yield (38.8 mg), 90% *ee*, [Daicel Chiralcel IA-H, hexanes/*i*-propanol = 90/10, flow rate = 1.0 mL/min,  $\lambda$  = 254.4 nm, *t* (major) = 8.105, *t* (minor) = 10.382];  $[\alpha]_D^{20}$  = +42.4 (c 0.1, CHCl<sub>3</sub>); <sup>1</sup>H NMR (400 MHz, CDCl<sub>3</sub>)  $\delta$  7.98 (d, *J* = 8.4 Hz, 1H), 7.66 (d, *J* = 8.4 Hz, 2H), 7.41 (t, *J* = 8.4 Hz, 1H), 7.21 (td, *J* = 8.6, 8.0, 6.4 Hz, 4H), 7.16 – 7.10 (m, 1H), 7.06 (d, *J* = 8.0 Hz, 2H), 6.83 – 6.75 (m, 2H), 6.37 (s, 1H), 5.83 (t, *J* = 2.4 Hz, 1H), 5.05 (t, *J* = 2.4 Hz, 1H), 4.60 (d, *J* = 9.2 Hz, 1H), 4.29 (s, 1H), 2.18 (s, 3H), 1.94 (d, *J* = 8.0 Hz, 6H). <sup>13</sup>C NMR (101 MHz, CDCl<sub>3</sub>)  $\delta$  172.2, 144.9, 144.6, 142.3, 133.9, 133.6, 130.0, 129.6, 129.1, 128.6, 128.3, 127.2, 125.9, 125.5, 124.6, 115.8, 98.4, 62.0, 55.7, 32.0, 31.0, 21.5; IR (KBr)  $\nu_{\max}$ : 3054, 2854, 1653, 1475, 1359, 1170, 1030, 752, 658, 571. HRMS (ESI): *m/z* = 577.0769 (calcd for C<sub>27</sub>H<sub>27</sub>BrN<sub>2</sub>O<sub>4</sub>S+Na<sup>+</sup> = 577.0767).

#### (*S*)-2-Bromo-2-methyl-*N*-((2-methylbenzyl)oxy)-*N*-(2-methylene-1-tosylindolin-3-yl)propanamide (**3b**)

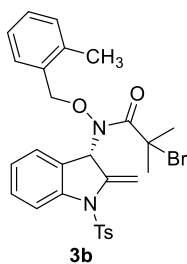

Flash column chromatography eluent petroleum ether/ethyl acetate = 20/1; white oil; 59% yield (33.5 mg), 95% *ee* [Daicel Chiralpak IA-H, hexanes/*i*-propanol = 95/5, flow: 1.0 mL/min,  $\lambda$  = 254 nm, *t* (major) = 9.74 min, *t* (minor) = 12.93 min];  $[\alpha]_D^{20}$  = +38.5 (c 0.1, CHCl<sub>3</sub>); <sup>1</sup>H NMR (400 MHz, CDCl<sub>3</sub>)  $\delta$  7.95 (d, *J* = 8.4 Hz, 1H), 7.67 (d, *J* = 8.0 Hz, 2H), 7.37 (t, *J* = 8.0 Hz, 1H), 7.23 (d, *J* = 7.6 Hz, 1H), 7.13 (q, *J* = 7.2 Hz, 2H), 7.04 (dd, *J* = 16.0, 7.6 Hz, 5H), 6.44 (s, 1H), 5.85 (d, *J* = 2.8 Hz, 1H), 5.05 (q, *J* = 2.0 Hz, 1H), 4.54 (d, *J* = 52.8 Hz, 2H), 2.16 (s, 3H), 1.94 (s, 6H), 1.75 (s, 3H). <sup>13</sup>C NMR (101 MHz, CDCl<sub>3</sub>)  $\delta$  172.2, 144.9, 144.7, 142.3, 137.9, 134.0, 133.5, 130., 129.9, 129.5, 129.4, 128.1, 127.2, 126.1, 124.6, 115.8, 98.3, 55.7, 53.5, 32.0, 31.0, 21.4, 21.2; IR (KBr)  $\nu_{\max}$ : 2965, 2858, 1652, 1492, 1360, 1261, 1171, 1033, 946, 870, 748, 658,

570. HRMS (ESI):  $m/z = 591.0924$  (calcd for  $C_{28}H_{29}BrN_2O_4S+Na^+ = 591.0924$ ).

**(S)-2-Bromo-2-methyl-N-((3-methylbenzyl)oxy)-N-(2-methylene-1-tosylindolin-3-yl)propanamide (3c)**

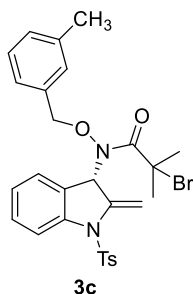

Flash column chromatography eluent petroleum ether/ethyl acetate = 20/1; yellow oil; 66% yield (37.4 mg). 96% ee [Daicel Chiralpak IA-H, hexanes/*i*-propanol = 95/5, flow: 1.0 mL/min,  $\lambda = 254$  nm,  $t$  (major) = 9.42 min,  $t$  (minor) = 12.37 min];  $[\alpha]_D^{20} = +67.3$  (c 0.1,  $CHCl_3$ );  $^1H$  NMR (400 MHz,  $CDCl_3$ )  $\delta$  7.98 (d,  $J = 8.4$  Hz, 1H), 7.66 (d,  $J = 8.0$  Hz, 2H), 7.41 (t,  $J = 8.0$  Hz, 1H), 7.22 (d,  $J = 7.6$  Hz, 1H), 7.18 – 7.02 (m, 5H), 6.63 (d,  $J = 7.2$  Hz, 1H), 6.51 (s, 1H), 6.36 (s, 1H), 5.83 (d,  $J = 2.4$  Hz, 1H), 5.06 (d,  $J = 2.4$  Hz, 1H), 4.59 (d,  $J = 9.2$  Hz, 1H), 4.28 (s, 1H), 2.24 (s, 3H), 2.19 (s, 3H), 1.95 (s, 6H).  $^{13}C$  NMR (101 MHz,  $CDCl_3$ )  $\delta$  172.2, 144.9, 144.7, 142.4, 137.9, 134.0, 133.5, 130.0, 129.9, 129.5, 129.4, 128.1, 127.2, 126.1, 126.0, 125.6, 124.6, 115.8, 98.3, 77.0, 62.1, 55.7, 32.0, 31.1, 21.5, 21.3; IR (KBr)  $\nu_{max}$ : 2951, 2837, 1653, 1599, 1476, 1361, 1260, 1172, 1032, 803, 749, 659, 571. HRMS (ESI):  $m/z = 591.0964$  (calcd for  $C_{28}H_{29}BrN_2O_4S+Na^+ = 591.0924$ ).

**(S)-2-Bromo-2-methyl-N-((4-methylbenzyl)oxy)-N-(2-methylene-1-tosylindolin-3-yl)propanamide (3d)**

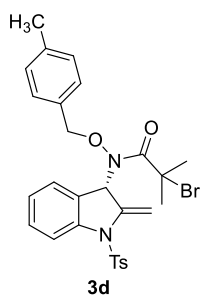

Flash column chromatography eluent petroleum ether/ethyl acetate = 20/1; yellow oil; 70% yield (39.8 mg), 93% ee [Daicel Chiralpak IA-H, hexanes/*i*-propanol = 95/5, flow: 1.0 mL/min,  $\lambda = 254$  nm,  $t$  (major) = 10.26 min,  $t$  (minor) = 13.11 min];  $[\alpha]_D^{20} = +56.3$  (c 0.1,  $CHCl_3$ );  $^1H$  NMR (400 MHz,  $CDCl_3$ )  $\delta$  8.00 (d,  $J = 8.4$  Hz, 1H), 7.73 – 7.62 (m, 2H), 7.43 (ddt,  $J = 8.4, 7.2, 1.2$  Hz, 1H), 7.23 (dt,  $J = 7.6, 1.6$  Hz, 1H), 7.15 (td,  $J = 7.6, 1.0$  Hz, 1H), 7.06 (dd,  $J = 23.2, 8.0$  Hz, 4H), 6.71 (d,  $J = 7.6$  Hz, 2H), 6.37 (s, 1H), 5.85 (t,  $J = 2.4$  Hz, 1H), 5.07 (t,  $J = 2.0$  Hz, 1H), 4.60 (d,  $J = 8.8$  Hz, 1H), 4.28 (s, 1H), 2.32 (s, 3H), 2.22 (s, 3H), 1.96 (s, 6H).  $^{13}C$  NMR (101 MHz,  $CDCl_3$ )  $\delta$  172.2, 144.9, 144.7, 142.3, 138.5, 134.0, 130.6, 130.0, 129.5, 129.2, 129.0, 127.2, 125.9, 125.6, 124.6, 115.8, 77.3, 76.8, 55.7, 53.5, 32.0, 31.0, 21.5, 21.2; IR (KBr)  $\nu_{max}$ : 2926, 2855, 1653, 1599, 1463, 1362, 1242, 1172, 985, 809, 705, 659, 571. HRMS (ESI):  $m/z = 591.0956$  (calcd for  $C_{28}H_{29}BrN_2O_4S+Na^+ = 591.0924$ ).

**(S)-2-Bromo-N-((2-bromobenzyl)oxy)-2-methyl-N-(2-methylene-1-tosylindolin-3-yl)propanamide (3e)**

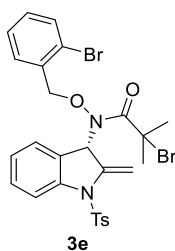

Flash column chromatography eluent petroleum ether/ethyl acetate = 20/1; white oil; 59% yield (37.3 mg), 74% ee [Daicel Chiralpak IA-H, hexanes/*i*-propanol = 95/5, flow: 1.0 mL • min<sup>-1</sup>,  $\lambda$  = 254 nm, *t* (major) = 12.15 min, *t* (minor) = 15.04 min];  $[\alpha]_D^{20}$  = +98.5 (c 0.1, CHCl<sub>3</sub>); <sup>1</sup>H NMR (400 MHz, CDCl<sub>3</sub>)  $\delta$  7.92 (d, *J* = 8.4 Hz, 1H), 7.72 – 7.63 (m, 2H), 7.47 (d, *J* = 8.0 Hz, 1H), 7.41 – 7.33 (m, 1H), 7.27 – 7.06 (m, 6H), 6.33 (s, 1H), 5.84 (t, *J* = 2.4 Hz, 1H), 5.06 (t, *J* = 2.4 Hz, 1H), 4.83 (s, 1H), 4.68 (s, 1H), 2.24 (s, 3H), 1.93 (s, 6H). <sup>13</sup>C NMR (101 MHz, CDCl<sub>3</sub>)  $\delta$  172.2, 144.8, 144.1, 142.2, 134.2, 133.8, 132.7, 130.6, 129.9, 129.9, 129.5, 127.4, 127.3, 126.2, 125.1, 124.7, 123.3, 115.8, 97.8, 76.2, 55.5, 31.8, 31.1, 21.5; IR (KBr)  $\nu_{\max}$ : 3054, 2854, 1653, 1475, 1359, 1170, 1030, 752, 658, 571. HRMS (ESI): *m/z* = 654.9868 (calcd for C<sub>27</sub>H<sub>26</sub>Br<sub>2</sub>N<sub>2</sub>O<sub>4</sub>S+Na<sup>+</sup> = 654.9872).

**(S)-2-Bromo-N-((3-bromobenzyl)oxy)-2-methyl-N-(2-methylene-1-tosylindolin-3-yl)propanamide (3f)**

Flash column chromatography eluent petroleum ether/ethyl acetate = 20/1; white oil; 62% yield (39.4 mg), 83% ee [Daicel Chiralpak IA-H, hexanes/*i*-propanol = 95/5, flow: 1.0 mL • min<sup>-1</sup>,  $\lambda$  =

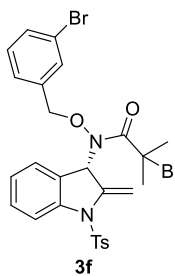

254 nm, *t* (major) = 11.50 min, *t* (minor) = 14.87 min];  $[\alpha]_D^{20}$  = +70.0 (c 0.1, CHCl<sub>3</sub>); <sup>1</sup>H NMR (400 MHz, CDCl<sub>3</sub>)  $\delta$  8.00 (d, *J* = 8.4 Hz, 1H), 7.75 – 7.62 (m, 2H), 7.54 – 7.34 (m, 2H), 7.26 – 7.02 (m, 5H), 6.76 (d, *J* = 7.6 Hz, 2H), 6.43 (s, 1H), 5.87 (t, *J* = 2.4 Hz, 1H), 5.08 (t, *J* = 2.4 Hz, 1H), 4.57 (d, *J* = 9.2 Hz, 1H), 4.22 (d, *J* = 9.2 Hz, 1H), 2.21 (s, 3H), 1.97 (s, 6H). <sup>13</sup>C NMR (101 MHz, CDCl<sub>3</sub>)  $\delta$  172.2, 145.0, 144.6, 142.3, 135.8, 133.0, 131.9, 131.7, 130.3, 129.9, 129.6, 127.4, 127.2, 126.0, 125.1, 124.7, 122.2, 115.8, 98.5, 76.0, 55.0, 32.1, 31.0, 21.5; IR (KBr)  $\nu_{\max}$ : 2937, 2833, 2041, 1916, 1652, 1572, 1463, 1361, 1237, 1032, 754, 658, 571. HRMS (ESI): *m/z* = 654.9878 (calcd for C<sub>27</sub>H<sub>26</sub>Br<sub>2</sub>N<sub>2</sub>O<sub>4</sub>S+Na<sup>+</sup> = 654.9872).

**(S)-2-Bromo-N-((4-bromobenzyl)oxy)-2-methyl-N-(2-methylene-1-tosylindolin-3-yl)propanamide (3g)**

Flash column chromatography eluent petroleum ether/ethyl acetate = 20/1; white oil; 64% yield

(40.7 mg), 83% ee [Daicel Chiralpak IA-H, hexanes/*i*-propanol = 95/5, flow: 1.0 mL/min,  $\lambda$  = 254 nm, t (major) = 11.87 min, t (minor) = 15.72 min];  $[\alpha]_D^{20}$  = +63.5 (c 0.1, CHCl<sub>3</sub>); <sup>1</sup>H NMR (400

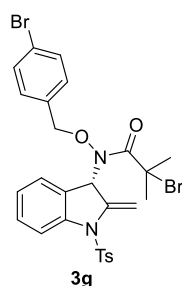

MHz, CDCl<sub>3</sub>)  $\delta$  8.00 (d,  $J$  = 8.4 Hz, 1H), 7.75 – 7.61 (m, 2H), 7.51 – 7.34 (m, 2H), 7.25 – 7.14 (m, 2H), 7.09 (t,  $J$  = 7.6 Hz, 3H), 6.76 (d,  $J$  = 7.5 Hz, 2H), 6.43 (s, 1H), 5.87 (t,  $J$  = 2.4 Hz, 1H), 5.08 (t,  $J$  = 2.2 Hz, 1H), 4.57 (d,  $J$  = 9.4 Hz, 1H), 4.22 (d,  $J$  = 8.9 Hz, 1H), 2.21 (s, 3H), 1.97 (s, 6H). <sup>13</sup>C NMR (101

MHz, CDCl<sub>3</sub>)  $\delta$  172.2, 145.0, 144.5, 142.3, 134.0, 132.6, 131.5, 130.7, 130.1, 129.6, 127.2, 125.9, 125.4, 124.6, 122.8, 115.8, 98.6, 76.2, 55.6, 32.1, 31.0, 21.5; IR (KBr)  $\nu_{\max}$ : 2927, 1653, 1598, 1463, 1362, 1261, 1172, 1090, 946, 874, 754, 659, 571. HRMS (ESI):  $m/z$  = 654.9875 (calcd for C<sub>27</sub>H<sub>26</sub>Br<sub>2</sub>N<sub>2</sub>O<sub>4</sub>S+Na<sup>+</sup> = 654.9872).

**(S)-2-Bromo-2-methyl-N-(2-methylene-1-tosylindolin-3-yl)-N-((2-nitrobenzyl)oxy)propanamide (3h)**

Flash column chromatography eluent petroleum ether/ethyl acetate = 20/1; yellow oil; 48% yield (28.1 mg), 70% ee [Daicel Chiralpak IA-H, hexanes/*i*-propanol = 95/5, flow: 1.0 mL/min,  $\lambda$  = 254

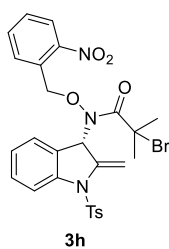

nm, t (major) = 20.01 min, t (minor) = 27.49 min];  $[\alpha]_D^{20}$  = +49.3 (c 0.1, CHCl<sub>3</sub>); <sup>1</sup>H NMR (400 MHz, CDCl<sub>3</sub>)  $\delta$  8.00 (d,  $J$  = 8.0 Hz, 1H), 7.77 (d,  $J$  = 8.4 Hz, 1H), 7.61 (dd,  $J$  = 17.6, 8.0 Hz, 3H), 7.45 (t,  $J$  = 7.6 Hz, 2H), 7.30 (d,  $J$  = 11.6 Hz, 2H), 7.12 (d,  $J$  = 8.0 Hz, 3H), 6.35 (s, 1H), 5.86 (s, 1H), 5.26 – 5.07 (m, 2H), 5.04 (s, 1H), 2.28 (s, 3H), 1.96 (d,  $J$  = 4.8 Hz, 6H). <sup>13</sup>C NMR (101 MHz,

CDCl<sub>3</sub>)  $\delta$  172.5, 146.5, 144.7, 143.3, 142.1, 134.3, 133.8, 131.3, 130.1, 129.5, 128.7, 128.5, 127.2, 126.0, 124.9, 124.8, 124.7, 115.7, 98.3, 74.5, 62.8, 55.1, 31.5, 21.5; IR (KBr)  $\nu_{\max}$ : 2928, 2856, 1675, 1528, 1361, 1172, 1090, 912, 811, 739, 660, 572. HRMS (ESI):  $m/z$  = 622.0664 (calcd for C<sub>27</sub>H<sub>26</sub>BrN<sub>3</sub>O<sub>6</sub>S+Na<sup>+</sup> = 622.0618).

**(S)-2-Bromo-N-((4-(tert-butyl)benzyl)oxy)-2-methyl-N-(2-methylene-1-tosylindolin-3-yl)propanamide (3i)**

Flash column chromatography eluent petroleum ether/ethyl acetate = 20/1; yellow oil; 66% yield (39.9 mg), 78% ee [Daicel Chiralpak IA-H, hexanes/*i*-propanol = 95/5, flow: 1.0 mL/min,  $\lambda$  = 254 nm, t (major) = 8.24 min, t (minor) = 11.09 min];  $[\alpha]_D^{20}$  = +21.5 (c 0.1, CHCl<sub>3</sub>); <sup>1</sup>H NMR (400 MHz, CDCl<sub>3</sub>)  $\delta$  8.00 (d,  $J$  = 8.4 Hz, 1H), 7.68 (d,  $J$  = 8.1 Hz, 2H), 7.44 (t,  $J$  = 7.8 Hz, 1H), 7.24 (dd,  $J$  =

8.1, 2.7 Hz, 3H), 7.16 (t,  $J = 7.4$  Hz, 1H), 7.07 (d,  $J = 8.0$  Hz, 2H), 6.75 (d,  $J = 8.0$  Hz, 2H), 6.38 (s, 1H), 5.84 (t,  $J = 2.4$  Hz, 1H), 5.07 (d,  $J = 2.3$  Hz, 1H), 4.60 (d,  $J = 8.9$  Hz, 1H), 4.27 (s, 1H),

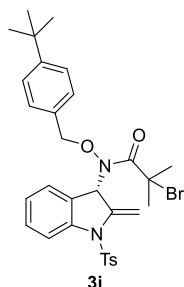

2.19 (s, 3H), 1.97 (s, 6H), 1.30 (s, 9H).  $^{13}\text{C}$  NMR (101 MHz,  $\text{CDCl}_3$ )  $\delta$  172.1, 151.7, 144.9, 144.7, 142.3, 133.9, 130.6, 130.0, 129.5, 129.0, 127.2, 125.9, 125.6, 125.2, 124.6, 115.8, 98.3, 77.2, 55.7, 34.6, 32.0, 31.3, 31.1, 21.4; IR (KBr)  $\nu_{\text{max}}$ : 2963, 2855, 1673, 1598, 1492, 1367, 1261, 1188, 1089, 989, 862, 746, 661, 571. HRMS (ESI):  $m/z = 633.1449$  (calcd for  $\text{C}_{31}\text{H}_{35}\text{BrN}_2\text{O}_4\text{S}+\text{Na}^+ =$

633.1393).

**(S)-2-Bromo-2-methyl-N-(2-methylene-1-tosylindolin-3-yl)-N-(thiophen-2-ylmethoxy)propanamide (3j)**

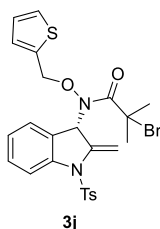

Flash column chromatography eluent petroleum ether/ethyl acetate = 20/1; white oil; 64% yield (36.3 mg), 86% ee [Daicel Chiralpak IA-H, hexanes/*i*-propanol = 95/5, flow: 1.0 mL/min,  $\lambda = 254$  nm,  $t$  (major) = 12.83 min,  $t$  (minor) = 18.17 min];  $[\alpha]_{\text{D}}^{20} = +42.3$  (c 0.1,  $\text{CHCl}_3$ );  $^1\text{H}$  NMR (400 MHz,  $\text{CDCl}_3$ )  $\delta$  7.97 (d,  $J = 8.4$  Hz, 1H), 7.76 – 7.56 (m, 2H), 7.44 – 7.34 (m, 1H),

7.23 (dd,  $J = 5.2, 1.2$  Hz, 1H), 7.21 – 7.17 (m, 1H), 7.15 – 7.07 (m, 3H), 6.86 (dd,  $J = 5.2, 3.6$  Hz, 1H), 6.64 – 6.48 (m, 1H), 6.32 (s, 1H), 5.81 (t,  $J = 2.4$  Hz, 1H), 5.03 (t,  $J = 2.4$  Hz, 1H), 4.78 (d,  $J = 10.0$  Hz, 1H), 4.49 (d,  $J = 10.0$  Hz, 1H), 2.24 (s, 3H), 1.95 (s, 6H).  $^{13}\text{C}$  NMR (101 MHz,  $\text{CDCl}_3$ )  $\delta$  172.4, 144.9, 144.6, 142.3, 135.1, 134.0, 130.1, 129.5, 129.0, 127.4, 127.3, 126.6, 125.8, 125.4, 124.7, 115.8, 98.5, 70.8, 55.6, 32.0, 31.0, 21.5; IR (KBr)  $\nu_{\text{max}}$ : 2977, 2933, 1668, 1468, 1369, 1226, 1175, 1036, 954, 855, 706, 572. HRMS (ESI):  $m/z = 583.0347$  (calcd for  $\text{C}_{25}\text{H}_{25}\text{BrN}_2\text{O}_4\text{S}_2+\text{Na}^+ = 583.0331$ ).

**(S)-2-Bromo-2-methyl-N-(2-methylene-1-tosylindolin-3-yl)-N-(naphthalen-2-ylmethoxy)propanamide (3k)**

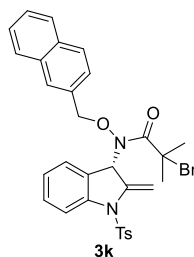

Flash column chromatography eluent petroleum ether/ethyl acetate = 20/1; yellow oil; 62% yield (37.0 mg), 82% ee [Daicel Chiralpak IA-H, hexanes/*i*-propanol = 95/5, flow: 1.0 mL/min,  $\lambda = 254$  nm,  $t$  (major) = 14.19 min,  $t$  (minor) = 17.01 min];  $[\alpha]_{\text{D}}^{20} = +44.7$  (c 0.1,  $\text{CHCl}_3$ );  $^1\text{H}$  NMR (400 MHz,  $\text{CDCl}_3$ )  $\delta$  8.01 (d,  $J = 8.4$  Hz, 1H), 7.83 – 7.76 (m, 1H), 7.73 – 7.69 (m, 1H), 7.66 (d,  $J = 8.0$  Hz,

3H), 7.52 – 7.39 (m, 3H), 7.24 (s, 2H), 7.16 (t,  $J = 7.2$  Hz, 1H), 6.99 (d,  $J = 8.0$  Hz, 2H), 6.82 (d,  $J = 8.4$  Hz, 1H), 6.44 (s, 1H), 5.87 (t,  $J = 2.4$  Hz, 1H), 5.10 (t,  $J = 2.0$  Hz, 1H), 4.76 (d,  $J = 9.2$  Hz, 1H), 4.44 (s, 1H), 2.05 (s, 3H), 1.96 (d,  $J = 14.2$  Hz, 6H).  $^{13}\text{C}$  NMR (101 MHz,  $\text{CDCl}_3$ )  $\delta$  172.3, 144.9, 144.7, 142.4, 133.9, 133.2, 132.9, 131.1, 130.1, 129.5, 128.6, 128.0, 128.0, 127.6, 127.2, 126.5, 126.4, 126.2, 126.1, 125.5, 124.6, 115.8, 98.4, 62.1, 55.7, 32.1, 31.0, 21.3; IR (KBr)  $\nu_{\text{max}}$ : 2925, 1653, 1599, 1476, 1361, 1261, 1171, 1090, 987, 858, 752, 659, 571. HRMS (ESI):  $m/z = 627.0848$  (calcd for  $\text{C}_{31}\text{H}_{29}\text{BrN}_2\text{O}_4\text{S}+\text{Na}^+ = 627.0924$ ).

**(S)-N-(Benzyloxy)-N-(2-methylene-1-tosylindolin-3-yl)pivalamide (3l)**

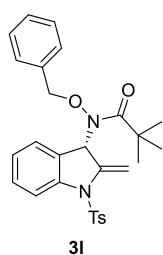

Flash column chromatography eluent petroleum ether/ethyl acetate = 20/1; yellow oil; 55% yield (27.4 mg), 62% ee [Daicel Chiralpak IA-H, hexanes/*i*-propanol = 95/5, flow: 1.0 mL/min,  $\lambda = 254$  nm,  $t$  (major) = 10.12 min,  $t$  (minor) = 12.17 min];  $[\alpha]_{\text{D}}^{20} = +42.4$  (c 0.1,  $\text{CHCl}_3$ );  $^1\text{H}$  NMR (400 MHz,  $\text{CDCl}_3$ )  $\delta$  7.99 (d,  $J = 8.4$  Hz, 1H), 7.74 – 7.60 (m, 2H), 7.50 – 7.36 (m, 3H), 7.22 – 7.12 (m, 2H), 7.13 – 7.04 (m, 3H), 6.67 (d,  $J = 8.4$  Hz, 2H), 6.48 (s, 1H), 5.83 (t,  $J = 2.4$  Hz, 1H), 5.02 (t,  $J = 2.0$  Hz, 1H), 4.32 – 4.06 (m, 2H), 2.22 (s, 3H), 1.27 (s, 9H).  $^{13}\text{C}$  NMR (101 MHz,  $\text{CDCl}_3$ )  $\delta$  179.8, 145.4, 144.9, 142.3, 136.0, 134.0, 131.6, 131.5, 130.0, 129.9, 129.5, 127.2, 126.9, 124.6, 122.3, 115.8, 98.1, 76.5, 61.4, 39.7, 27.1, 21.5. IR (KBr)  $\nu_{\text{max}}$ : 2966, 2930, 2872, 1735, 1663, 1454, 1364, 1174, 1089, 988, 812, 747, 661, 577. HRMS (ESI):  $m/z = 513.1819$  (calcd for  $\text{C}_{28}\text{H}_{30}\text{N}_2\text{O}_4\text{S}+\text{Na}^+ = 513.1818$ ).

**(S)-N-(Benzyloxy)-2-bromo-2-methyl-N-(4-methyl-2-methylene-1-tosylindolin-3-yl)propanamide (3m)**

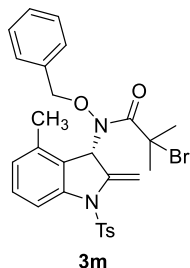

Flash column chromatography eluent petroleum ether/ethyl acetate = 20/1; yellow oil; 63% yield (35.8 mg), 85% ee [Daicel Chiralpak IA-H, hexanes/*i*-propanol = 95/5, flow: 1.0 mL/min,  $\lambda = 254$  nm,  $t$  (major) = 9.61 min,  $t$  (minor) = 13.96 min];  $[\alpha]_{\text{D}}^{20} = +45.2$  (c 0.1,  $\text{CHCl}_3$ );  $^1\text{H}$  NMR (400 MHz,  $\text{CDCl}_3$ )  $\delta$  7.79 (s, 1H), 7.69 – 7.62 (m, 2H), 7.27 – 7.17 (m, 3H), 7.08 (t,  $J = 7.2$  Hz, 3H), 6.95 (d,  $J = 7.6$  Hz, 1H), 6.85 (d,  $J = 7.2$  Hz, 2H), 6.30 (s, 1H), 5.80 (t,  $J = 2.4$  Hz, 1H), 5.03 (t,  $J = 2.4$  Hz, 1H), 4.61 (d,  $J = 9.2$  Hz, 1H), 4.35 (d,  $J = 9.2$  Hz, 1H), 2.45 (s, 3H), 2.21 (s, 3H), 1.93 (d,  $J = 5.6$  Hz, 6H).  $^{13}\text{C}$  NMR (101 MHz,  $\text{CDCl}_3$ )  $\delta$  172.2, 144.9,

144.8, 142.5, 140.4, 134.1, 133.8, 129.5, 129.1, 128.6, 128.3, 127.2, 125.5, 125.4, 122.7, 116.3, 98.4, 61.9, 55.7, 31.9, 31.1, 22.1, 21.5. IR (KBr)  $\nu_{\max}$ : 2963, 2872, 1649, 1481, 1367, 1260, 1174, 1090, 802, 747, 661, 568. HRMS (ESI):  $m/z = 591.0922$  (calcd for  $C_{28}H_{29}BrN_2O_4S+Na^+ = 591.0924$ ).

**(S)-N-(Benzyloxy)-2-bromo-N-(5-methoxy-2-methylene-1-tosylindolin-3-yl)-2-methylpropanamide (3n)**

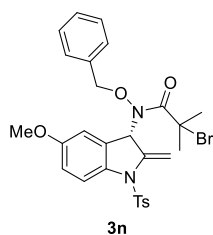

Flash column chromatography eluent petroleum ether/ethyl acetate = 20/1; yellow oil; 52% yield (30.2 mg), 90% ee [Daicel Chiralpak IA-H, hexanes/*i*-propanol = 95/5, flow: 1.0 mL/min,  $\lambda = 254$  nm,  $t$  (major) = 14.12 min,  $t$  (minor) = 21.26 min];  $[\alpha]_D^{20} = +62.2$  (c 0.1,  $CHCl_3$ );  $^1H$  NMR (400 MHz,  $CDCl_3$ )  $\delta$  7.88 (d,  $J = 9.2$  Hz, 1H), 7.64 (d,  $J = 8.0$  Hz, 2H), 7.47 – 7.38 (m, 2H), 7.29 – 7.21 (m, 2H), 7.10 (d,  $J = 8.0$  Hz, 2H), 6.97 – 6.89 (m, 2H), 6.76 (d,  $J = 2.8$  Hz, 1H), 6.28 (s, 1H), 5.85 (s, 1H), 5.06 (d,  $J = 2.4$  Hz, 1H), 4.65 (s, 1H), 4.45 (s, 1H), 3.78 (s, 3H), 2.24 (s, 3H), 1.96 (s, 6H);  $^{13}C$  NMR (101 MHz,  $CDCl_3$ )  $\delta$  171.1, 145.6, 137.6, 135.4, 133.8, 133.6, 130.2, 129.2, 128.8, 128.5, 127.2, 126.5, 125.1, 118.7, 118.0, 115.8, 74.9, 56.0, 31.6, 22.7, 21.6, 14.2, 12.9. IR (KBr)  $\nu_{\max}$ : 2963, 2929, 1652, 1597, 1486, 1388, 1286, 1171, 1089, 960, 856, 749, 677, 581. HRMS (ESI):  $m/z = 607.0873$  (calcd for  $C_{28}H_{29}BrN_2O_5S+Na^+ = 607.0850$ ).

**(S)-N-(Benzyloxy)-2-bromo-2-methyl-N-(5-methyl-2-methylene-1-tosylindolin-3-yl)propanamide (3o)**

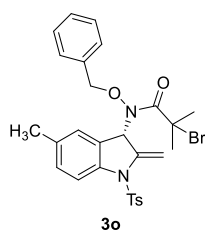

Flash column chromatography eluent petroleum ether/ethyl acetate = 20/1; yellow oil; 56% yield (31.7 mg), 98% ee [Daicel Chiralpak IA-H, hexanes/*i*-propanol = 95/5, flow: 1.0 mL/min,  $\lambda = 254$  nm,  $t$  (major) = 9.98 min,  $t$  (minor) = 14.42 min];  $[\alpha]_D^{20} = +76.3$  (c 0.1,  $CHCl_3$ );  $^1H$  NMR (400 MHz,  $CDCl_3$ )  $\delta$  7.83 (d,  $J = 8.4$  Hz, 1H), 7.64 (d,  $J = 8.4$  Hz, 2H), 7.27 – 7.16 (m, 4H), 7.06 (d,  $J = 8.0$  Hz, 2H), 6.99 (s, 1H), 6.85 (d,  $J = 7.2$  Hz, 2H), 6.29 (s, 1H), 5.81 (t,  $J = 2.4$  Hz, 1H), 5.02 (t,  $J = 2.4$  Hz, 1H), 4.61 (d,  $J = 8.8$  Hz, 1H), 4.35 (s, 1H), 2.31 (s, 3H), 2.20 (s, 3H), 1.94 (d,  $J = 4.0$  Hz, 6H);  $^{13}C$  NMR (101 MHz,  $CDCl_3$ )  $\delta$  172.2, 145.0, 144.3, 142.2, 137.4, 133.9, 132.2, 130.2, 130.0, 129.5, 128.8, 127.2, 126.7, 125.7, 124.8, 115.9, 98.1, 61.9, 55.7, 32.0, 31.2, 21.4, 18.4. IR (KBr)  $\nu_{\max}$ : 2970, 2927, 2863, 1683, 1506, 1457, 1372, 1245, 1175, 1089, 913,

808, 744, 662, 599. HRMS (ESI):  $m/z = 591.0918$  (calcd for  $C_{28}H_{29}BrN_2O_4S+Na^+ = 591.0924$ ).

**(S)-N-(Benzyloxy)-2-bromo-N-(5-chloro-2-methylene-1-tosylindolin-3-yl)-2-methylpropanamide (3p)**

Flash column chromatography eluent petroleum ether/ethyl acetate = 20/1; yellow oil; 60% yield

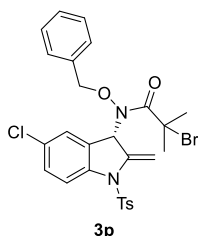

(35.3 mg), 82% ee [Daicel Chiralpak IA-H, hexanes/*i*-propanol = 95/5, flow: 1.0 mL/min,  $\lambda = 254$  nm,  $t$  (major) = 9.82 min,  $t$  (minor) = 12.42 min];  $[\alpha]_D^{20} = +65.0$  (c 0.1,  $CHCl_3$ );  $^1H$  NMR (400 MHz,  $CDCl_3$ )  $\delta$  7.91 (d,  $J = 8.8$  Hz, 1H), 7.67 (d,  $J = 8.0$  Hz, 2H), 7.38 (dd,  $J = 9.2, 2.4$  Hz, 3H), 7.31 (d,  $J = 7.6$  Hz, 1H), 7.19 (d,  $J = 2.0$  Hz, 1H), 7.14 (d,  $J = 8.0$  Hz, 2H), 6.97 (d,  $J = 7.2$  Hz,

2H), 6.23 (s, 1H), 5.85 (t,  $J = 2.4$  Hz, 1H), 5.07 (t,  $J = 2.4$  Hz, 1H), 4.75 (d,  $J = 9.2$  Hz, 1H), 4.48 (s, 1H), 2.26 (s, 3H), 1.94 (s, 6H).  $^{13}C$  NMR (101 MHz,  $CDCl_3$ )  $\delta$  172.2, 145.2, 144.1, 140.8, 133.8, 133.6, 130.1, 130.0, 129.63, 129.0, 128.8, 128.5, 127.8, 127.3, 125.5, 116.8, 98.5, 77.1, 55.4, 31.8, 30.9, 21.5; IR (KBr)  $\nu_{max}$ : 2929, 1655, 1597, 1493, 1362, 1247, 1117, 1020, 950, 858, 739, 665, 585, 499. HRMS (ESI):  $m/z = 611.0375$  (calcd for  $C_{27}H_{26}BrClN_2O_4S+Na^+ = 611.0377$ ).

**(S)-N-(Benzyloxy)-2-bromo-N-(5-bromo-2-methylene-1-tosylindolin-3-yl)-2-methylpropanamide (3q)**

Flash column chromatography eluent petroleum ether/ethyl acetate = 20/1; yellow oil; 52% yield (33.2 mg), 77% ee [Daicel Chiralpak IA-H, hexanes/*i*-propanol = 95/5, flow: 1.0 mL/min,  $\lambda = 254$

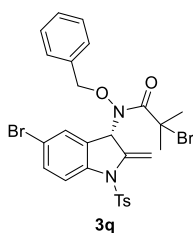

nm,  $t$  (major) = 10.23 min,  $t$  (minor) = 13.31 min];  $[\alpha]_D^{20} = +57.4$  (c 0.1,  $CHCl_3$ );  $^1H$  NMR (400 MHz,  $CDCl_3$ )  $\delta$  7.85 (d,  $J = 8.8$  Hz, 1H), 7.67 (d,  $J = 8.0$  Hz, 2H), 7.52 (d,  $J = 8.8$  Hz, 1H), 7.31 (d,  $J = 8.8$  Hz, 4H), 7.14 (d,  $J = 8.0$  Hz, 2H), 6.97 (s, 2H), 6.22 (s, 1H), 5.84 (s, 1H), 5.06 (s, 1H), 4.74 (s, 1H), 4.47 (s, 1H), 2.26 (s, 3H), 1.94 (s, 6H).  $^{13}C$  NMR (101 MHz,  $CDCl_3$ )  $\delta$

172.2, 145.2, 144.0, 141.3, 133.8, 133.6, 132.90, 129.6, 128.9, 128.8, 128.5, 128.4, 128.2, 127.3, 117.5, 117.1, 98.4, 55.4, 31.8, 30.9, 29.7, 21.5; IR (KBr)  $\nu_{max}$ : 2962, 2926, 2854, 1655, 1596, 1452, 1363, 1248, 1174, 1090, 1019, 912, 809, 736, 664, 581. HRMS (ESI):  $m/z = 654.9816$  (calcd for  $C_{27}H_{26}Br_2N_2O_4S+Na^+ = 654.9872$ ).

**(S)-N-(Benzyloxy)-2-bromo-N-(6-fluoro-2-methylene-1-tosylindolin-3-yl)-2-methylpropanamide (3r)**



Flash column chromatography eluent petroleum ether/ethyl acetate = 20/1; yellow oil; 56% yield (31.9 mg), 90% ee [Daicel Chiralpak IA-H, hexanes/*i*-propanol = 95/5, flow: 1.0 mL/min,  $\lambda$  = 254

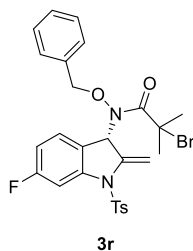

3r

nm, t (major) = 9.38 min, t (minor) = 11.93 min];  $[\alpha]_D^{20} = +36.0$  (c 0.1,  $\text{CHCl}_3$ );

$^1\text{H NMR}$  (400 MHz,  $\text{CDCl}_3$ )  $\delta$  7.69 – 7.58 (m, 3H), 7.25 – 7.17 (m, 1H), 7.19 – 7.12 (m, 2H), 7.08 (ddd,  $J$  = 8.4, 5.6, 1.2 Hz, 1H), 7.02 (d,  $J$  = 8.0 Hz, 2H), 6.83 – 6.71 (m, 3H), 6.21 (s, 1H), 5.74 (t,  $J$  = 2.4 Hz, 1H), 4.97 (t,  $J$  = 2.4 Hz, 1H), 4.56 (d,  $J$  = 9.2 Hz, 1H), 4.31 – 4.18 (m, 1H), 2.13 (s, 3H), 1.85 (d,  $J$  =

6.0 Hz, 6H).  $^{19}\text{F NMR}$  (376 MHz,  $\text{CDCl}_3$ )  $\delta$  -116.00 (s).  $^{13}\text{C NMR}$  (101 MHz,  $\text{CDCl}_3$ )  $\delta$  171.2, 162.81 (d,  $J_{\text{C-F}}$  = 246.6 Hz), 144.2, 143.8, 142.6, 142.5, 132.8, 132.6, 128.6, 127.9, 127.7, 127.4, 126.2, 120.0, 110.45 (d,  $J_{\text{C-F}}$  = 23.1 Hz), 102.82 (d,  $J_{\text{C-F}}$  = 29.5 Hz) 97.3, 60.5, 54.5, 30.8, 30.0, 20.5; IR (KBr)  $\nu_{\text{max}}$ : 2964, 2923, 2847, 1667, 1485, 1366, 1262, 1172, 1089, 802, 706, 586. HRMS (ESI):  $m/z$  = 595.0677 (calcd for  $\text{C}_{27}\text{H}_{26}\text{BrFN}_2\text{O}_4\text{S} + \text{Na}^+$  = 595.0673).

**(S)-N-((Benzyloxy)-2-bromo-N-(6-chloro-2-methylene-1-tosylindolin-3-yl)-2-methylpropanamide (3s)**

Flash column chromatography eluent petroleum ether/ethyl acetate = 20/1; yellow oil; 47% yield (27.3 mg), 75% ee [Daicel Chiralpak IA-H, hexanes/*i*-propanol = 95/5, flow: 1.0 mL/min,  $\lambda$  = 254

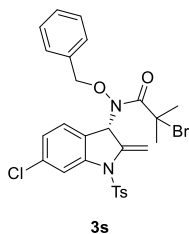

3s

nm, t (major) = 9.68 min, t (minor) = 12.58 min];  $[\alpha]_D^{20} = +55.7$  (c 0.1,  $\text{CHCl}_3$ );

$^1\text{H NMR}$  (400 MHz,  $\text{CDCl}_3$ )  $\delta$  8.01 (s, 1H), 7.70 (d,  $J$  = 8.0 Hz, 2H), 7.31 (s, 1H), 7.29 (s, 2H), 7.14 (d,  $J$  = 6.8 Hz, 4H), 6.93 (s, 2H), 6.26 (s, 1H), 5.84 (s, 1H), 5.06 (s, 1H), 4.71 (s, 1H), 4.42 (s, 1H), 2.25 (s, 3H), 1.94 (d,  $J$  = 4.4 Hz, 6H).  $^{13}\text{C NMR}$  (101 MHz,  $\text{CDCl}_3$ )  $\delta$  182.9, 172.3, 145.2, 144.4, 143.2, 135.9,

133.82, 133.6, 130.2, 129.7, 128.9, 128.7, 128.4, 127.3, 124.7, 115.9, 98.3, 61.8, 55.5, 31.8, 31.0, 21.5; IR (KBr)  $\nu_{\text{max}}$ : 2960, 2851, 1721, 1687, 1511, 1468, 1360, 1261, 1172, 1090, 966, 866, 764, 660, 545. HRMS (ESI):  $m/z$  = 611.0375 (calcd for  $\text{C}_{27}\text{H}_{26}\text{BrClN}_2\text{O}_4\text{S} + \text{Na}^+$  = 611.0377).

**(S)-N-((3-Methylbenzyl)oxy)-N-(2-methylene-1-tosylindolin-3-yl)pivalamide (3u)**

Flash column chromatography eluent petroleum ether/ethyl acetate = 20/1; yellow oil; 52% yield (26.3 mg), 76% ee, [Daicel Chiralcel IA-H, hexanes/*i*-propanol = 95/5, flow rate = 1.0 mL/min,  $\lambda$  = 254.4 nm, t (major) = 8.833, t (minor) = 10.551];  $[\alpha]_D^{20} = +43.2$  (c 0.1,  $\text{CHCl}_3$ );  $^1\text{H NMR}$  (400 MHz,  $\text{CDCl}_3$ )  $\delta$  8.00 (d,  $J$  = 8.4 Hz, 1H), 7.67 (d,  $J$  = 8.4 Hz, 2H), 7.42 (tt,  $J$  = 7.2, 2.4 Hz, 1H),

7.20 – 7.00 (m, 7H), 6.56 (d,  $J = 7.2$  Hz, 1H), 6.43 (s, 1H), 5.82 (t,  $J = 2.4$  Hz, 1H), 5.04 (t,  $J = 2.4$  Hz, 1H), 4.36 – 4.09 (m, 2H), 2.26 (s, 3H), 2.20 (s, 3H), 1.28 (s, 9H).  $^{13}\text{C}$  NMR (101 MHz,  $\text{CDCl}_3$ )  $\delta$  179.8, 145.5, 144.8, 142.3, 137.9, 134.0, 133.7, 129.7, 129.5, 129.3, 128.2, 127.2, 126.12, 126.0, 125.6, 124.5, 124.5, 115.7, 97.9, 61.4, 39.7, 31.6, 27.1, 21.4, 21.2; IR (KBr)  $\nu_{\text{max}}$ : 2959, 2927, 1652, 1660, 1463, 1362, 1172, 1090, 931, 751, 658, 571. HRMS (EI):  $m/z = 504.2093$  (calcd for  $\text{C}_{29}\text{H}_{32}\text{N}_2\text{O}_4\text{S} = 504.2083$ ).

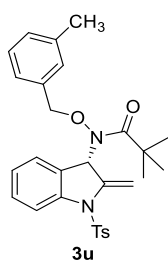

### *N*-(Benzyloxy)-2-bromo-*N*-((*S*)-2-methylene-1-tosylindolin-3-yl)propenamide (**3v**)

Flash column chromatography eluent petroleum ether/ethyl acetate = 20/1; yellow oil; 81% yield (43.2 mg), 1:1 dr, 50% ee, [Daicel Chiralcel IC-H, hexanes/*i*-propanol = 95/5, flow rate = 1.0 mL/min,  $\lambda = 254.4$  nm,  $t$  (major) = 58.160,  $t$  (minor) = 68.143];  $[\alpha]_{\text{D}}^{20} = +31.3$  (c 0.1,  $\text{CHCl}_3$ );  $^1\text{H}$  NMR (400 MHz,  $\text{CDCl}_3$ )  $\delta$  7.89 (d,  $J = 8.4$  Hz, 1H), 7.62 – 7.56 (m, 2H), 7.33 (dd,  $J = 7.6, 1.2$  Hz, 1H), 7.26 – 7.21 (m, 4H), 7.05 (tt,  $J = 7.6, 1.2$  Hz, 3H), 6.88 (d,  $J = 1.6$  Hz, 1H), 6.77 (d,  $J = 1.6$  Hz, 1H), 6.35 (s, 1H), 5.80 (t,  $J = 2.4$  Hz, 1H), 5.03 (t,  $J = 2.4$  Hz, 1H), 4.51 (d,  $J = 10.4$  Hz, 1H), 4.23 (d,  $J = 5.6$  Hz, 1H), 4.03 (dd,  $J = 8.4, 5.2$  Hz, 1H), 2.17 (s, 3H), 1.58 (s, 3H).  $^{13}\text{C}$  NMR (101 MHz,  $\text{CDCl}_3$ )  $\delta$  172.9, 144.9, 144.0, 142.9, 134.3, 133.7, 130.4, 129.6, 129.1, 128.7, 127.40, 126.0, 125.5, 124.7, 115.8, 99.6, 79.3, 60.7, 37.2, 31.9, 21.6, 21.0; IR (KBr)  $\nu_{\text{max}}$ : 3033, 2975, 2253, 1674, 1477, 1362, 1172, 1090, 945, 754, 659, 573. HRMS (EI):  $m/z = 540.0715$  (calcd for  $\text{C}_{26}\text{H}_{25}\text{BrN}_2\text{O}_4\text{S} = 540.0718$ ).

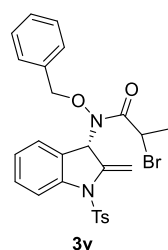

## 6. Scale-up synthesis and further transformations of the adducts

### 6.1 Scale-up synthesis of **3a**

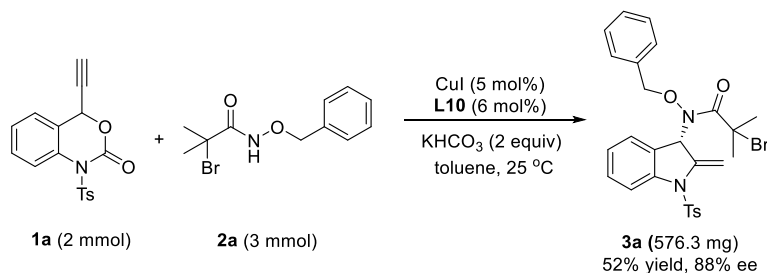

To an oven-dried three-necked flask, CuI (19.0 mg, 0.1 mmol, 5 mol%) and **L10** (47.2 mg, 0.12 mmol, 6 mol%) in dry toluene (40.0 mL) were added under a nitrogen atmosphere. The resulting

mixture was stirred at room temperature for 0.5 hours. Then the substrates **1a** (654.1 mg, 2.0 mmol, 1.0 equiv) and **2a** (813.1 mg, 3.0 mmol, 1.5 equiv) was introduced into the vessel. The mixture was stirred for 14 hours at 25 °C and then it was subjected to silica gel column (petroleum ether/EtOAc 10:1 v/v) to afford the desired products **3a** as yellow oil in 52% yield (576.3 mg) with 88% ee.

## 6.2 Procedure for the preparation of **4a**

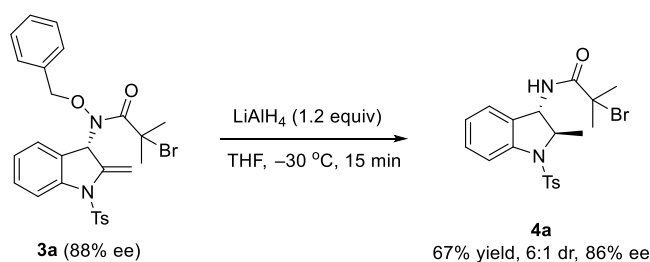

To an oven-dried schlenk tube, LiAlH<sub>4</sub> (4.6 mg, 0.12 mmol, 1.2 equiv) in dry tetrahydrofuran (1.0 mL) was added under a nitrogen atmosphere. The mixture was cool to -30 °C and stirred for 20 minutes. Then, **3a** (55.4 mg, 0.1 mmol, 1 equiv) in dry tetrahydrofuran (1.0 mL) was added. After stirring for 15 minutes at -30 °C. The crude reaction mixture was directly purified by flash column chromatography on silica gel column (petroleum ether/EtOAc 10:1 v/v) to afford the corresponding **4a** in 67% yield, 6:1 dr and 86% ee.

### 2-Bromo-2-methyl-*N*-(2-methyl-1-tosylindolin-3-yl)propenamide (**4a**)

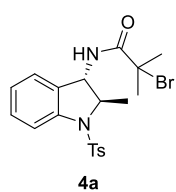

Flash column chromatography eluent petroleum ether/ethyl acetate = 10/1; yellow oil; 67% yield (30.2 mg), 6:1 dr, 86% ee, [Daicel Chiralcel IA-H, hexanes/*i*-propanol = 95/5, flow rate = 1.0 mL/min,  $\lambda$  = 254.4 nm, t (major) = 11.888, t (minor) = 13.036]; [ $\alpha$ ]<sub>D</sub><sup>20</sup> = +24.9 (c 0.1, CHCl<sub>3</sub>); <sup>1</sup>H NMR (400 MHz,

CDCl<sub>3</sub>)  $\delta$  8.15 (d,  $J$  = 8.0 Hz, 1H), 7.65 (d,  $J$  = 8.0 Hz, 2H), 7.27 – 7.13 (m, 6H), 6.82 (s, 1H), 2.61 (p,  $J$  = 6.8 Hz, 1H), 2.44 (s, 3H), 2.31 (s, 3H), 1.30 – 1.26 (m, 6H). <sup>13</sup>C NMR (101 MHz, CDCl<sub>3</sub>)  $\delta$  176.2, 144.9, 135.9, 135.0, 132.2, 130.0, 127.0, 126.4, 124.4, 123.6, 117.6, 117.5, 114.5, 35.8, 21.5, 19.8, 12.6.; IR (KBr)  $\nu_{\text{max}}$ : 3676, 2920, 1655, 1463, 1358, 1186, 1090, 945, 754, 659, 551. HRMS (EI):  $m/z$  = 450.0613 (calcd for C<sub>20</sub>H<sub>23</sub>BrN<sub>2</sub>O<sub>3</sub>S = 450.0619).

## 7. X-Ray data of 3g

**Table S7** Crystal data and structure refinement for **3g**

|                                             |                                                                                |
|---------------------------------------------|--------------------------------------------------------------------------------|
| Empirical formula                           | C <sub>27</sub> H <sub>26</sub> O <sub>4</sub> Br <sub>2</sub> SN <sub>2</sub> |
| Formula weight                              | 634.38                                                                         |
| Temperature/K                               | 223(2)                                                                         |
| Crystal system                              | orthorhombic                                                                   |
| Space group                                 | P2 <sub>1</sub> 2 <sub>1</sub> 2 <sub>1</sub>                                  |
| a/Å                                         | 8.9489(3)                                                                      |
| b/Å                                         | 10.2140(2)                                                                     |
| c/Å                                         | 29.3155(6)                                                                     |
| α/°                                         | 90                                                                             |
| β/°                                         | 90                                                                             |
| γ/°                                         | 90                                                                             |
| Volume/Å <sup>3</sup>                       | 2679.54(11)                                                                    |
| Z                                           | 4                                                                              |
| ρ <sub>calc</sub> /g/cm <sup>3</sup>        | 1.573                                                                          |
| μ/mm <sup>-1</sup>                          | 4.863                                                                          |
| F(000)                                      | 1280.0                                                                         |
| Crystal size/mm <sup>3</sup>                | 0.500 × 0.300 × 0.200                                                          |
| Radiation                                   | CuKα (λ = 1.54184)                                                             |
| 2θ range for data collection/°              | 9.168 to 155.228                                                               |
| Index ranges                                | -10 ≤ h ≤ 11, -12 ≤ k ≤ 12, -28 ≤ l ≤ 37                                       |
| Reflections collected                       | 11354                                                                          |
| Independent reflections                     | 5357 [R <sub>int</sub> = 0.0442, R <sub>sigma</sub> = 0.0483]                  |
| Data/restraints/parameters                  | 5357/0/328                                                                     |
| Goodness-of-fit on F <sup>2</sup>           | 1.125                                                                          |
| Final R indexes [I ≥ 2σ (I)]                | R <sub>1</sub> = 0.0614, wR <sub>2</sub> = 0.1504                              |
| Final R indexes [all data]                  | R <sub>1</sub> = 0.0638, wR <sub>2</sub> = 0.1540                              |
| Largest diff. peak/hole / e Å <sup>-3</sup> | 0.98/-0.78                                                                     |
| Flack parameter                             | -0.02(2)                                                                       |

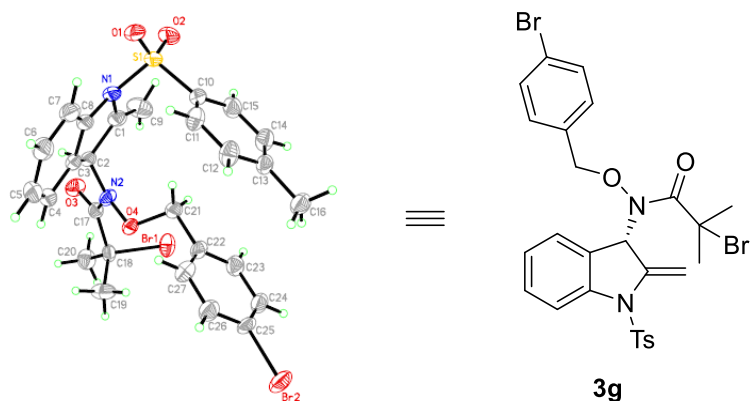

**Figure S1.** ORTEP drawing of **3g** (50% thermal ellipsoids)

In order to determine the structure and absolute configuration of the product, we dissolved the product **3g** in 0.4 mL ethyl acetate and placed the solution in the NMR tube. Then n-hexane was absorbed with a syringe and slowly added into the NMR tube until it was filled. After that, the NMR tube was sealed and put in the refrigerator, and the product **3g** single crystal was obtained by slow penetration of n-hexane. **CCDC 2040799** (**3g**) contains the supplementary crystallographic data for this paper. These data can be obtained free of charge from The Cambridge Crystallographic Data Centre via [www.ccdc.cam.ac.uk/data\\_request/cif](http://www.ccdc.cam.ac.uk/data_request/cif).

## 8. NMR spectra

### (S)-N-(Benzyloxy)-2-bromo-2-methyl-N-(2-methylene-1-tosylindolin-3-yl)propanamide (3a)

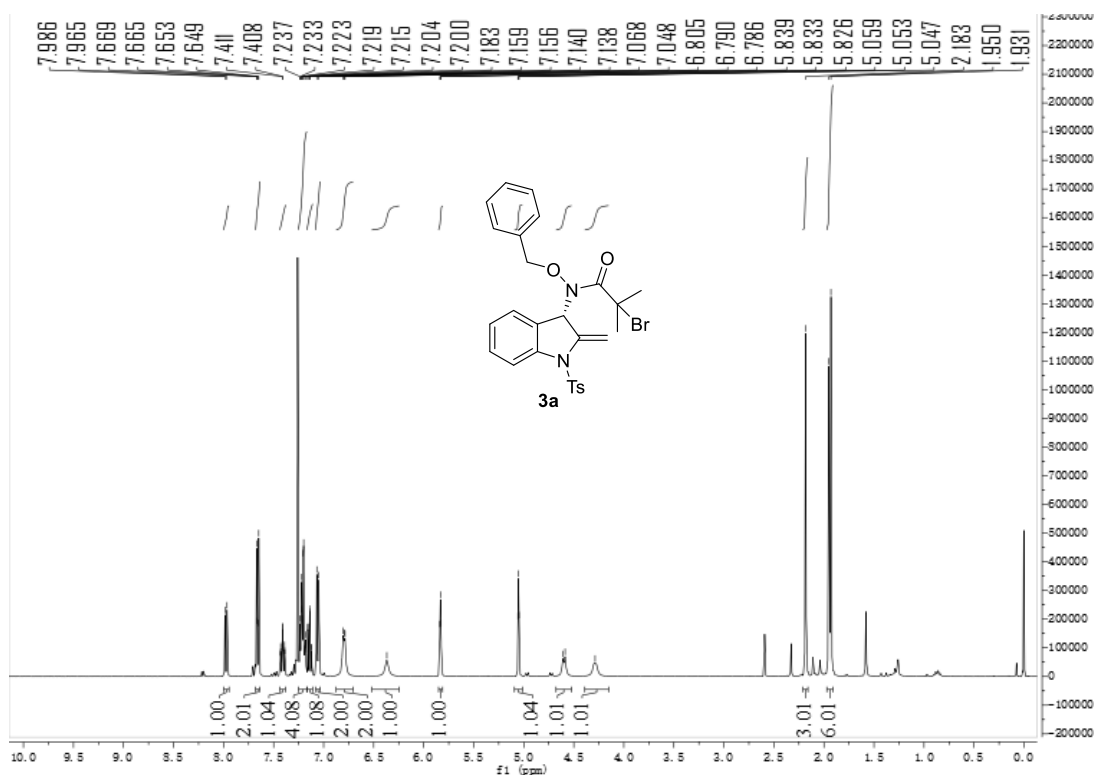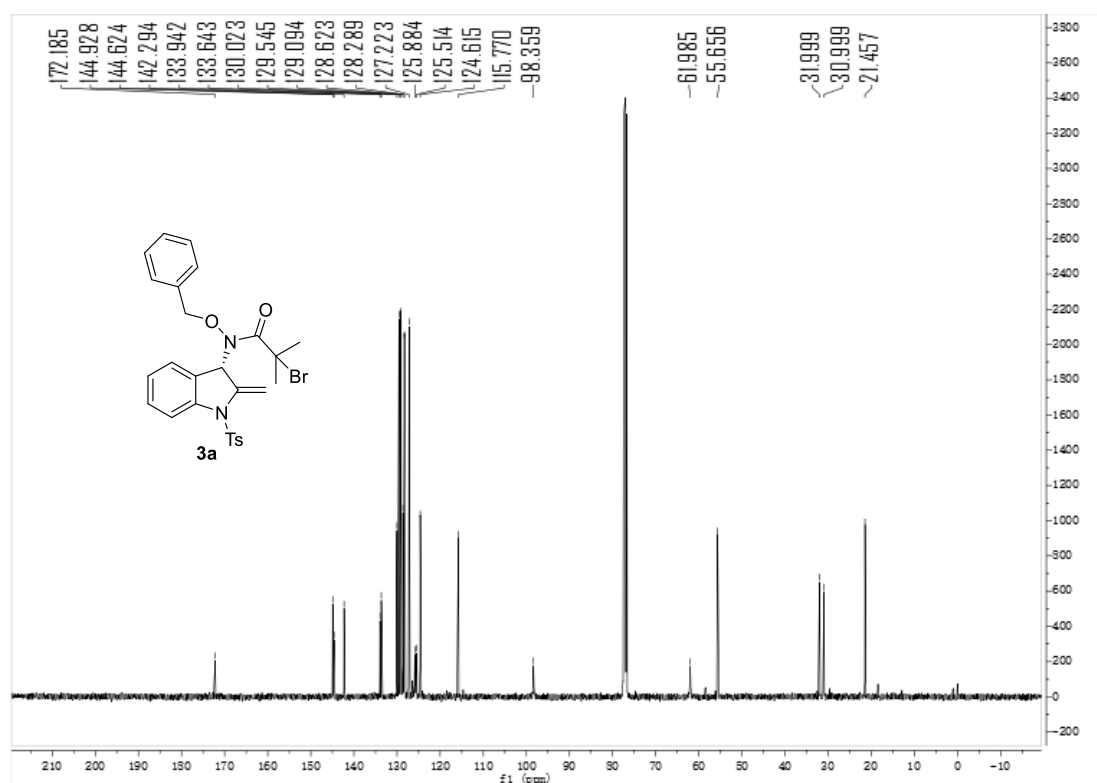

**(S)-2-Bromo-2-methyl-N-((2-methylbenzyl)oxy)-N-(2-methylene-1-tosylindolin-3-yl)propanamide (3b)**

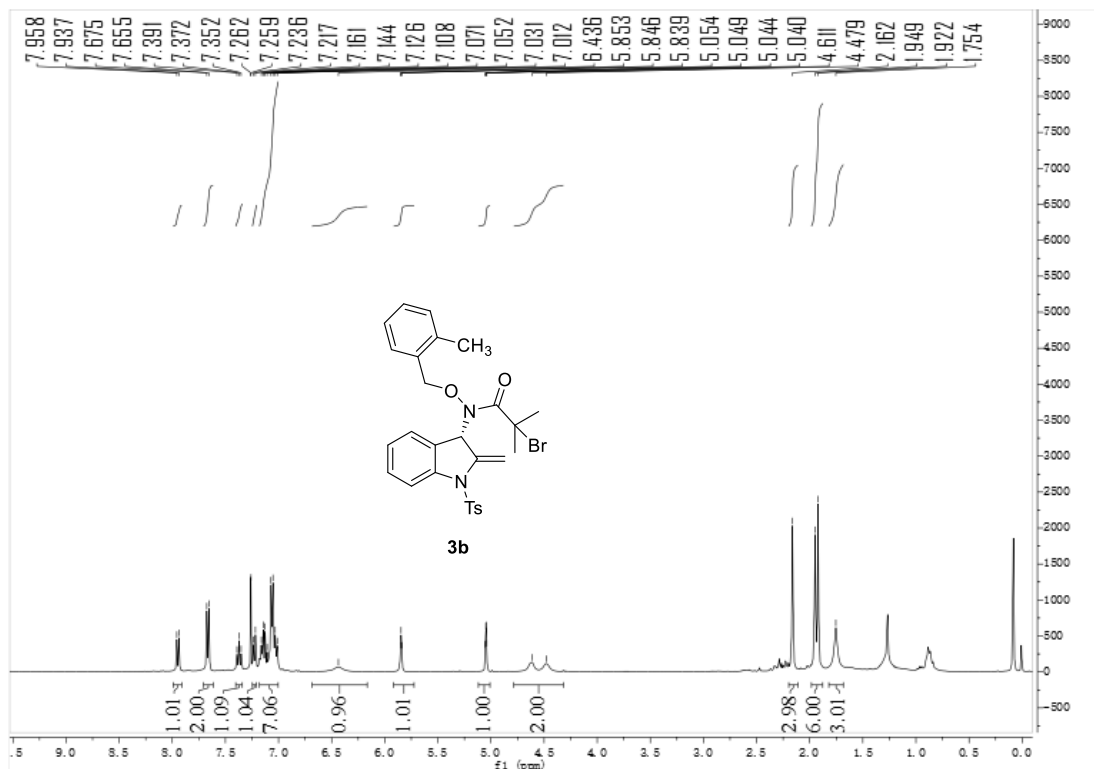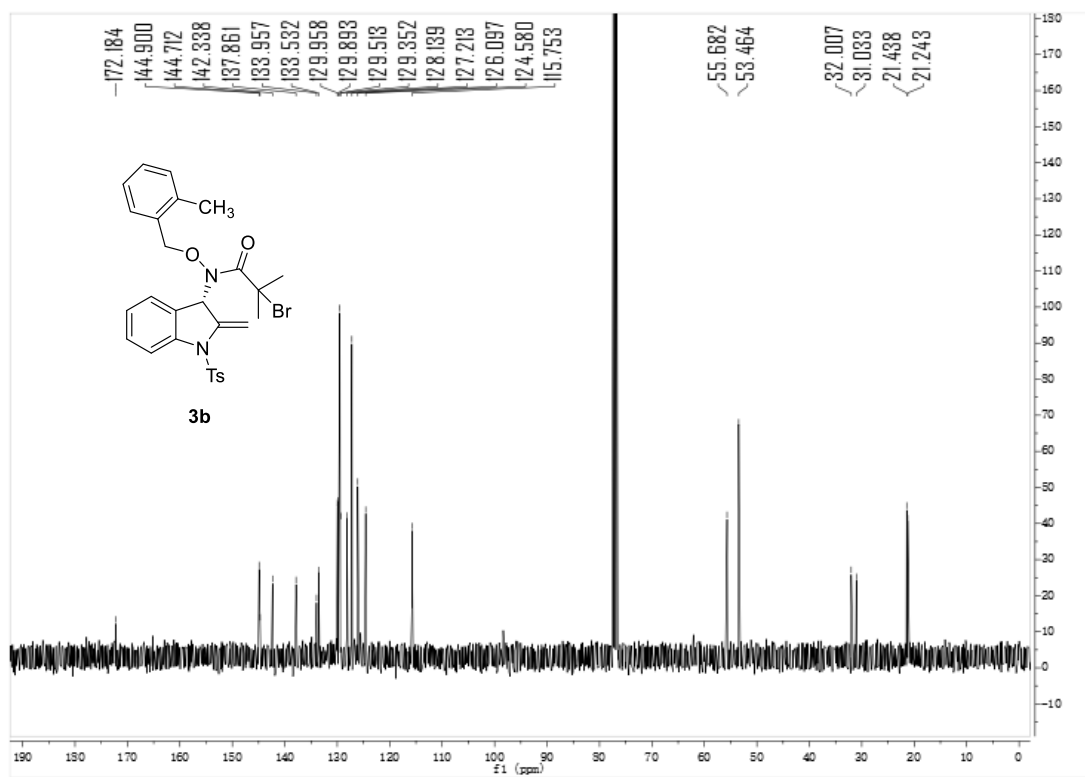

**(S)-2-Bromo-2-methyl-N-((3-methylbenzyl)oxy)-N-(2-methylene-1-tosylindolin-3-yl)propanamide (3c)**

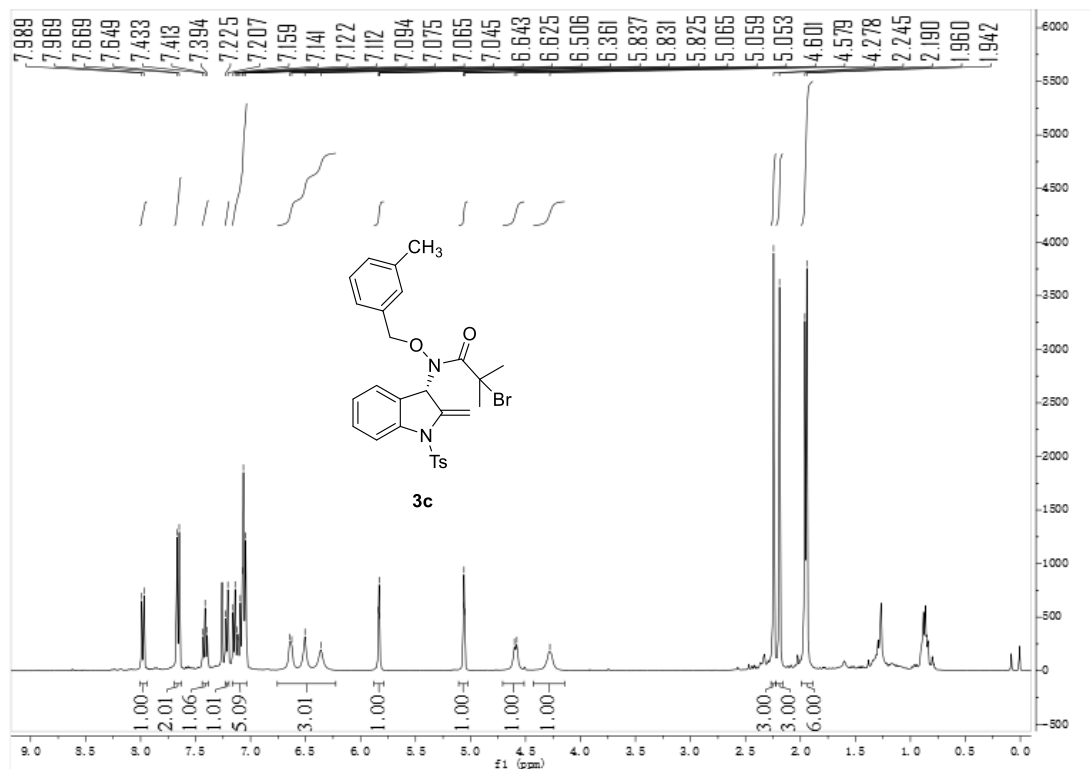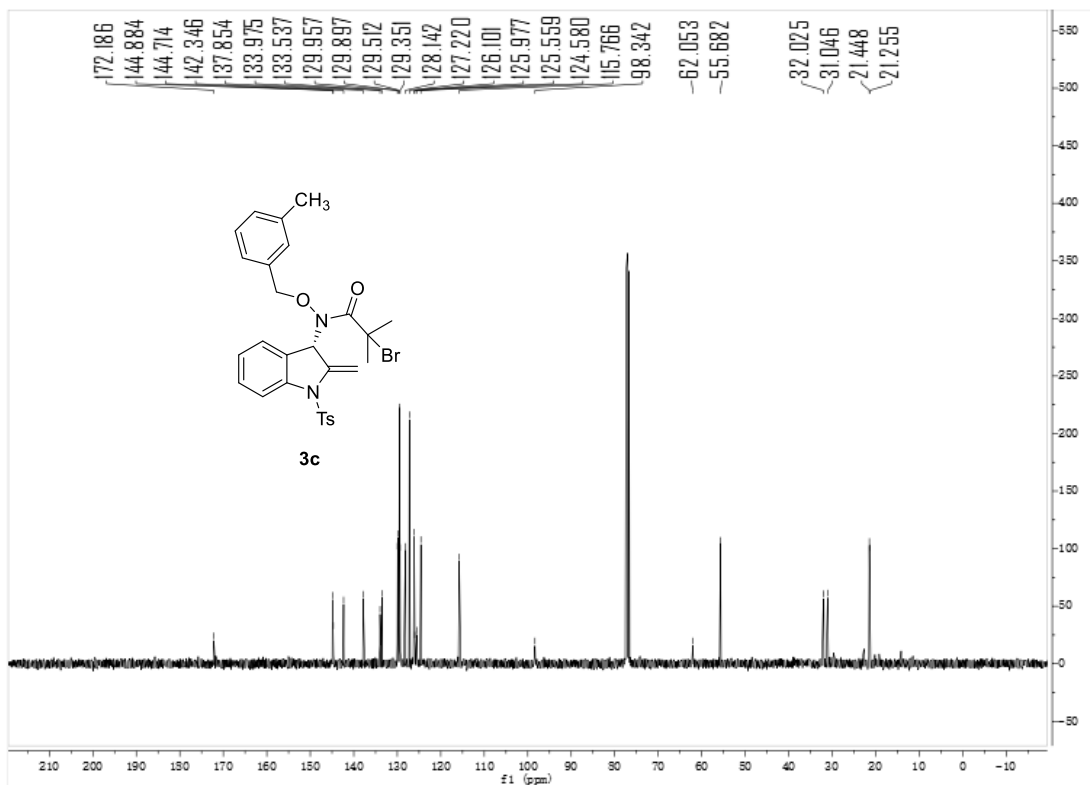



**(S)-2-Bromo-2-methyl-N-((4-methylbenzyl)oxy)-N-(2-methylene-1-tosylindolin-3-yl)propanamide (3d)**

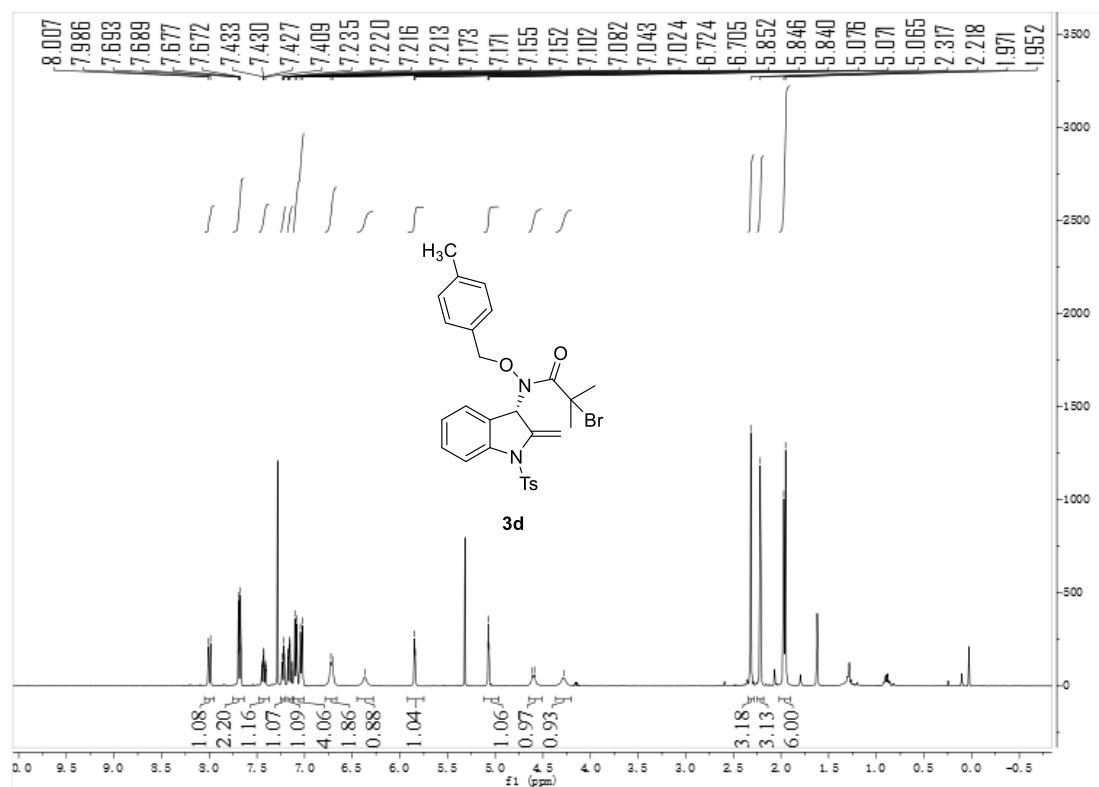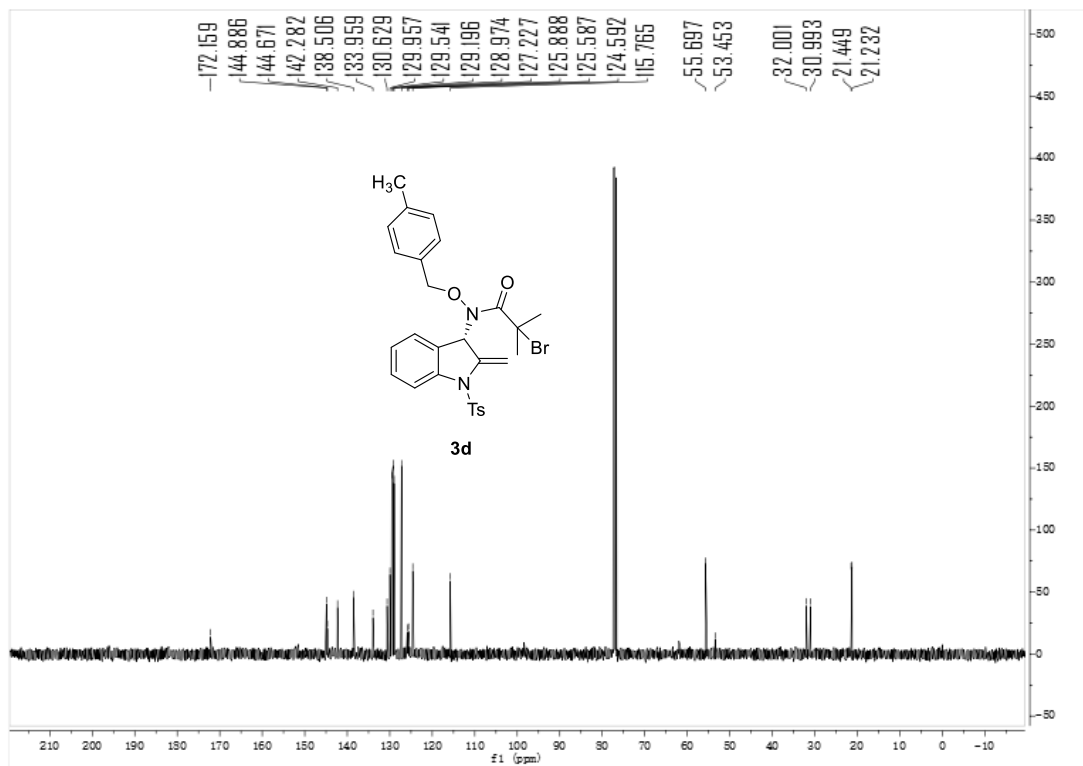

**(S)-2-Bromo-N-((2-bromobenzyl)oxy)-2-methyl-N-(2-methylene-1-tosylindolin-3-yl)propanamide (3e)**

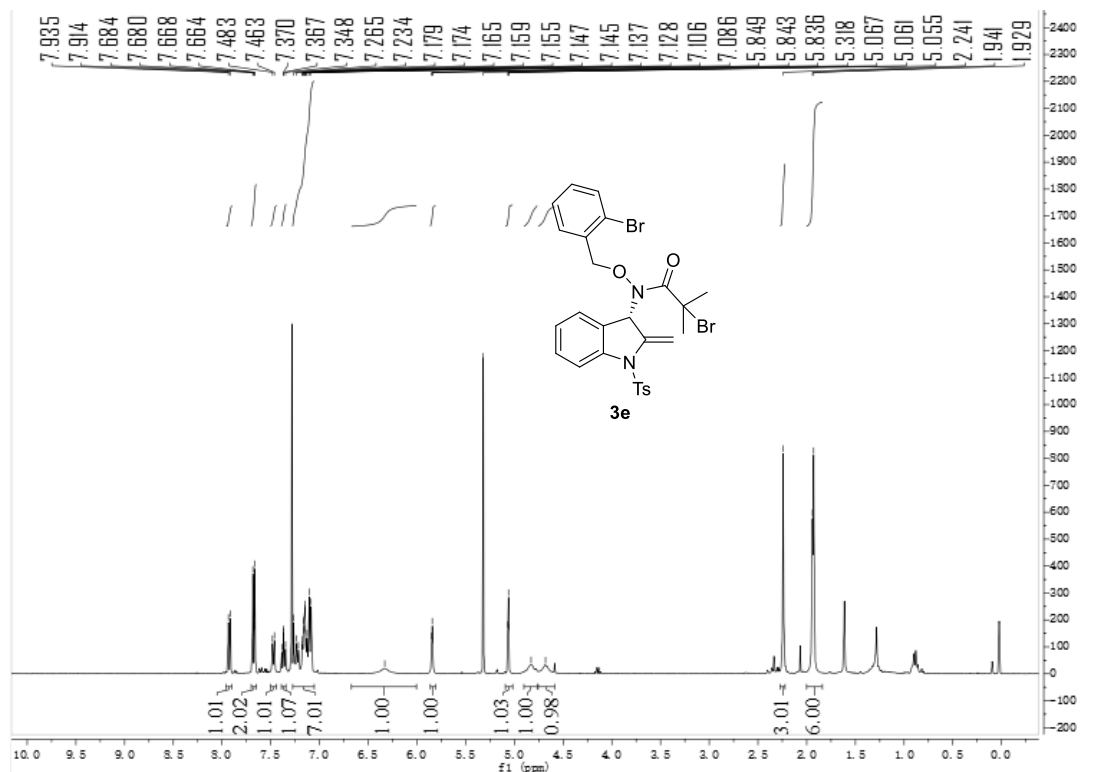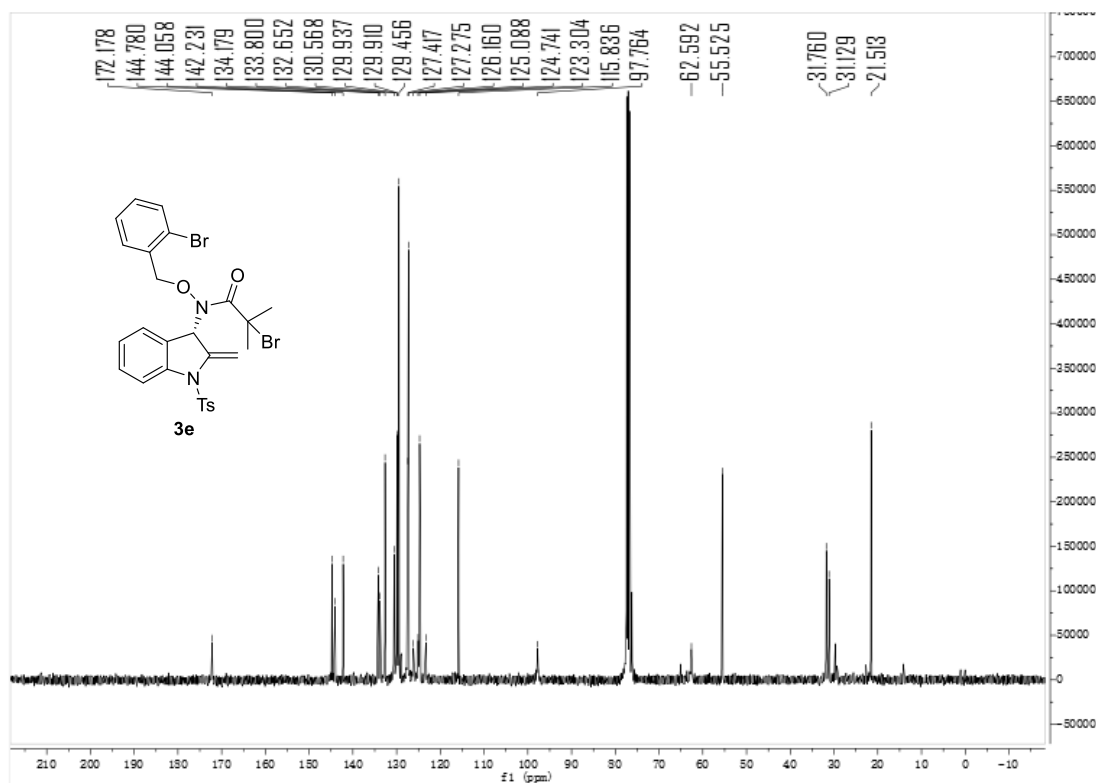

**(S)-2-Bromo-N-((3-bromobenzyl)oxy)-2-methyl-N-(2-methylene-1-tosylindolin-3-yl)propanamide (3f)**

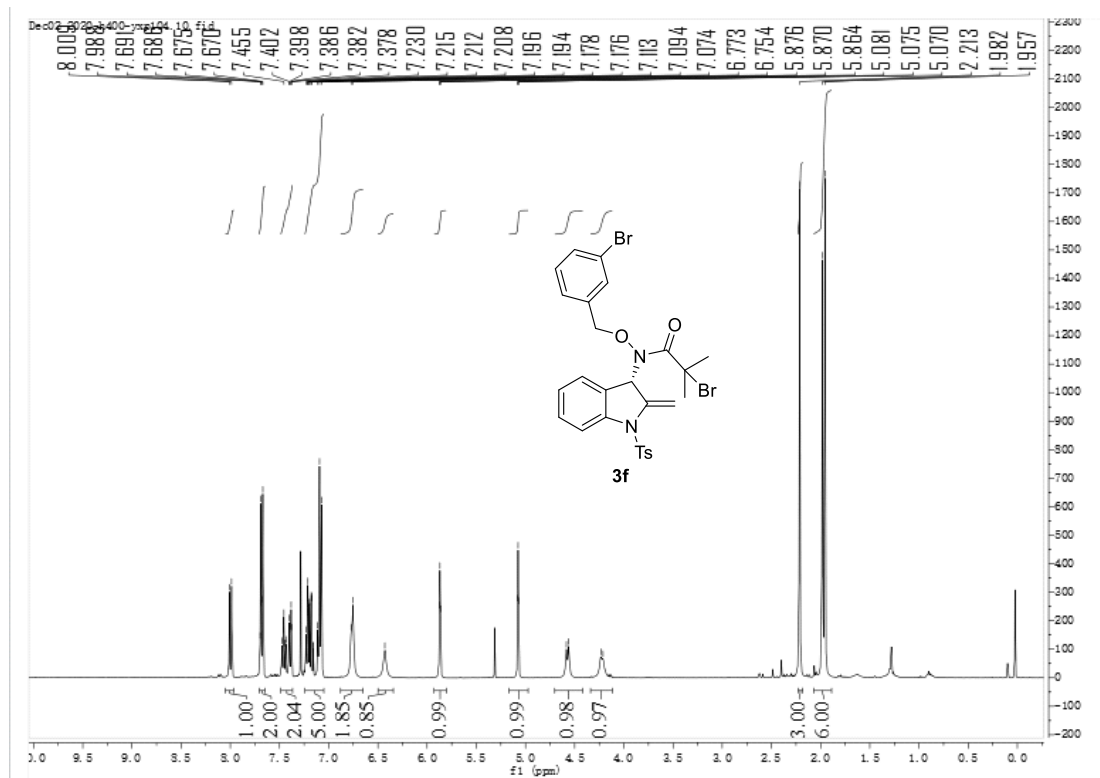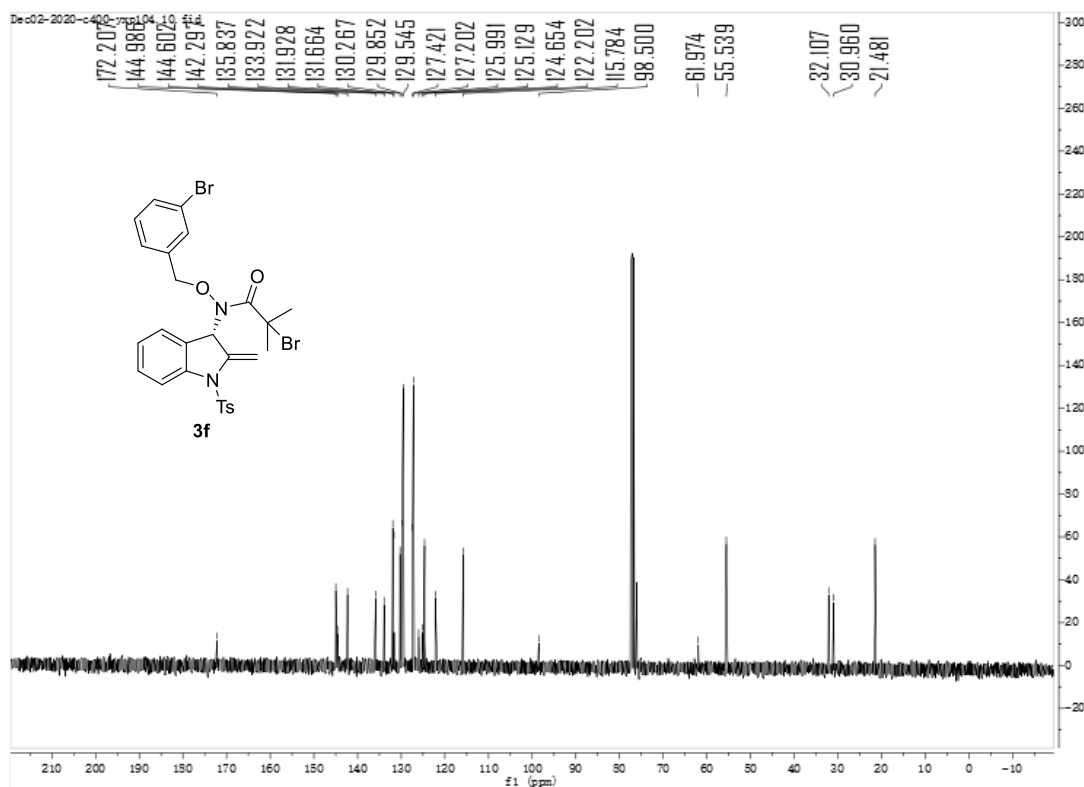

**(S)-2-Bromo-N-((4-bromobenzyl)oxy)-2-methyl-N-(2-methylene-1-tosylindolin-3-yl)propanamide (3g)**

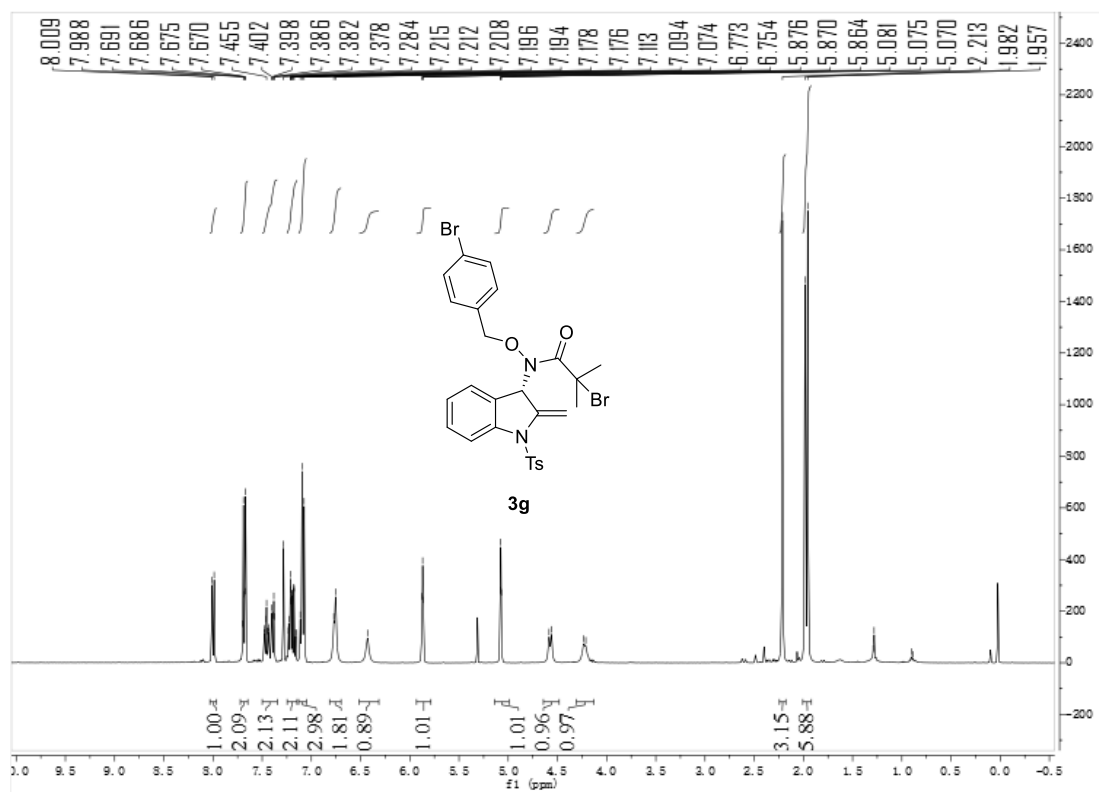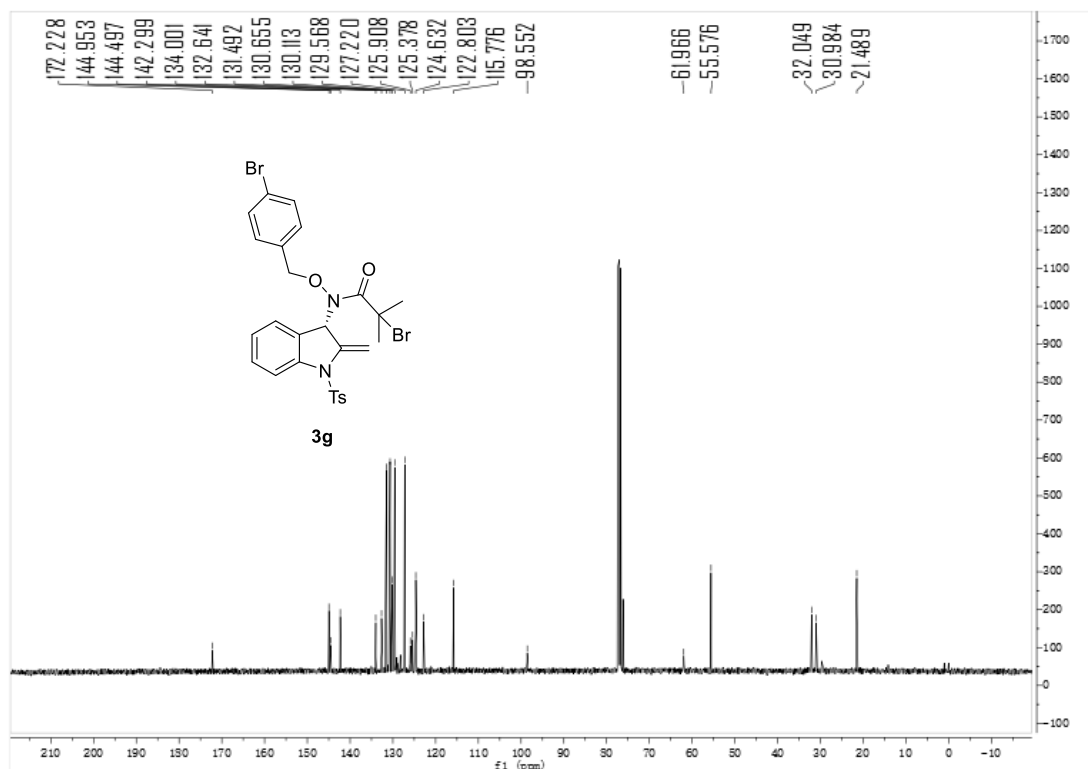

**(S)-2-Bromo-2-methyl-N-(2-methylene-1-tosylindolin-3-yl)-N-((2-nitrobenzyl)oxy)propanamide (3h)**

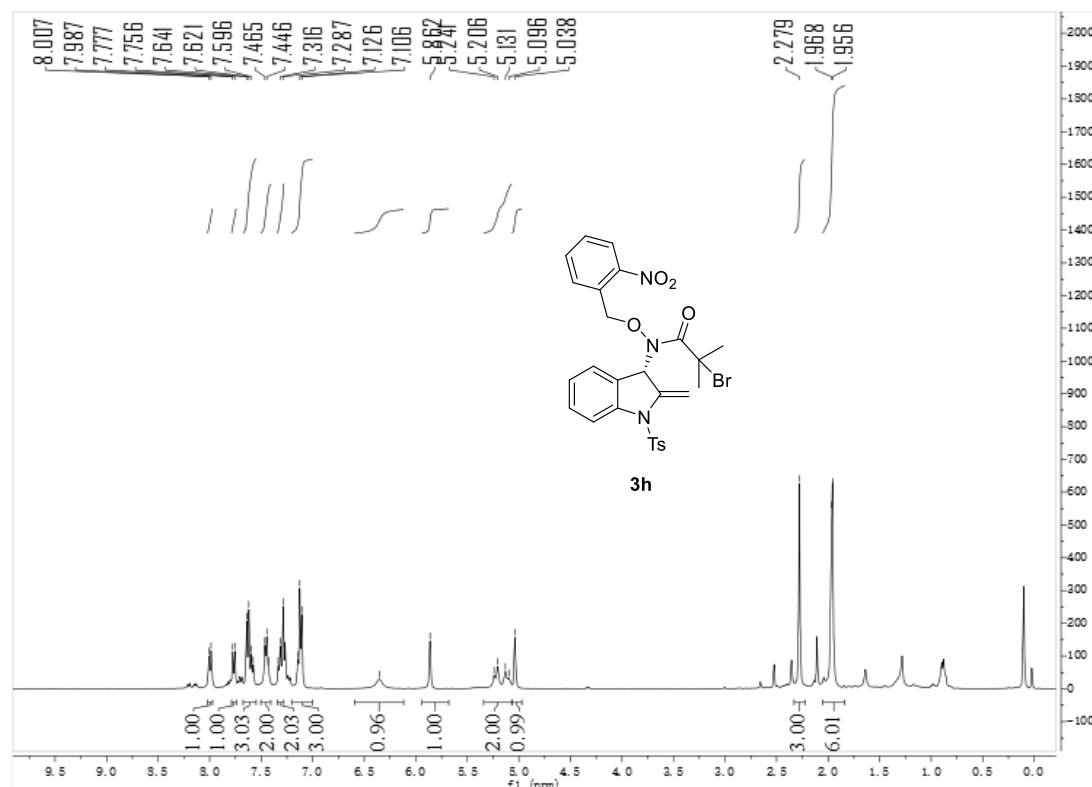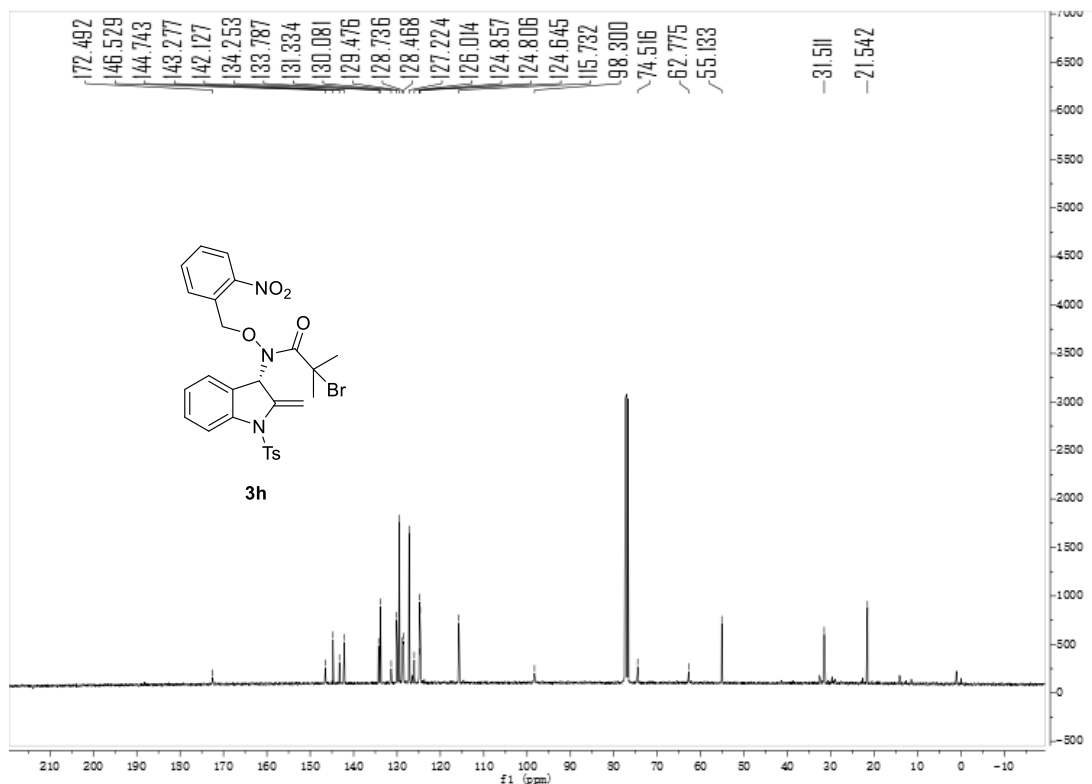

**(S)-2-Bromo-N-((4-*tert*-butyl)benzyl)oxy)-2-methyl-N-(2-methylene-1-tosylindolin-3-yl)prop  
 anamide (3i)**

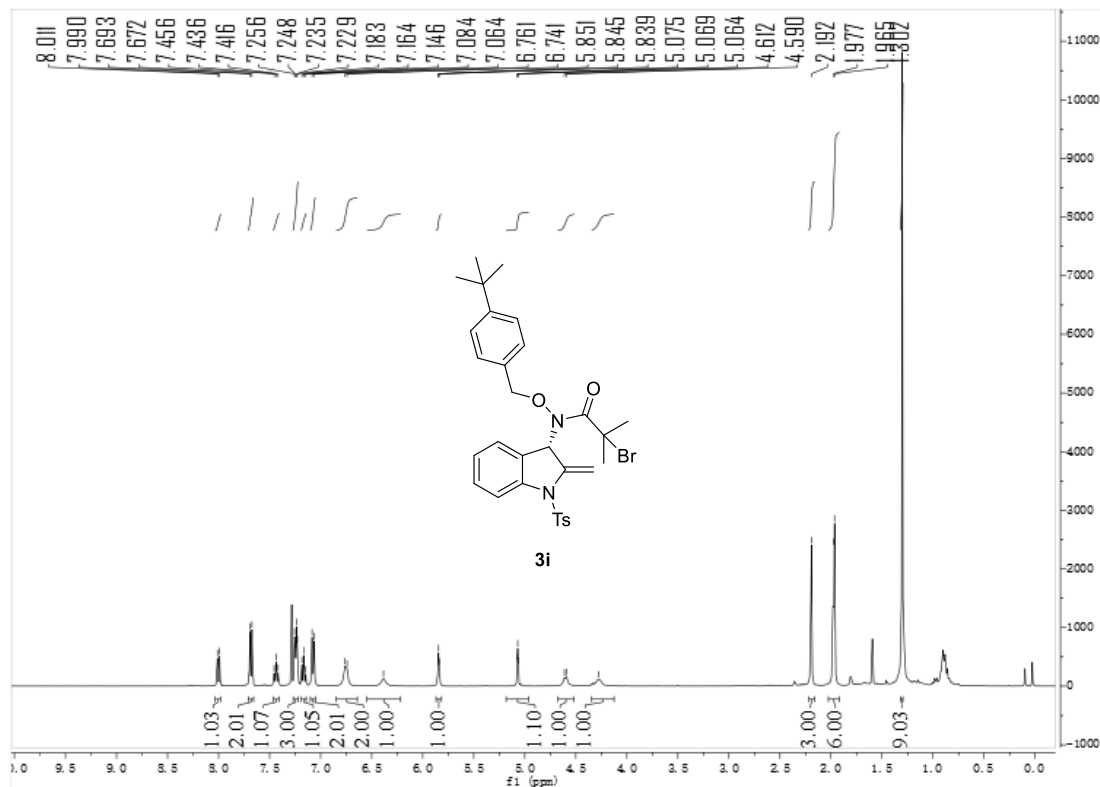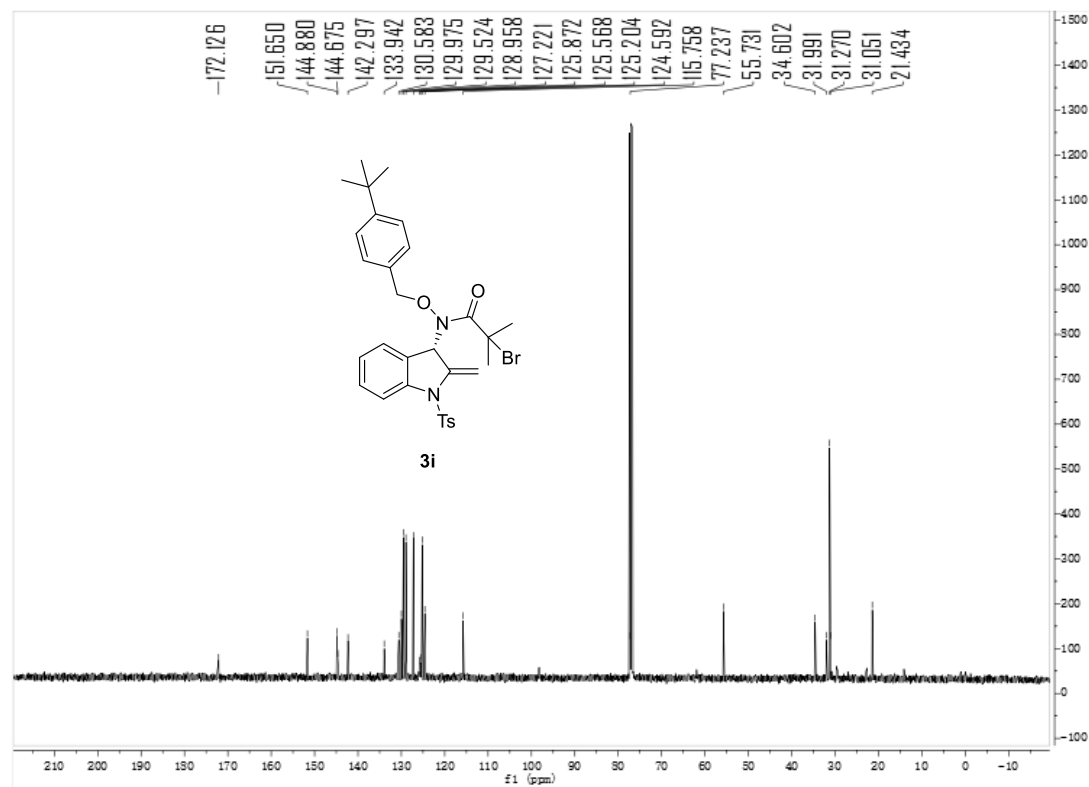

**(S)-2-Bromo-2-methyl-N-(2-methylene-1-tosylindolin-3-yl)-N-(thiophen-2-ylmethoxy)propanamide (3j)**

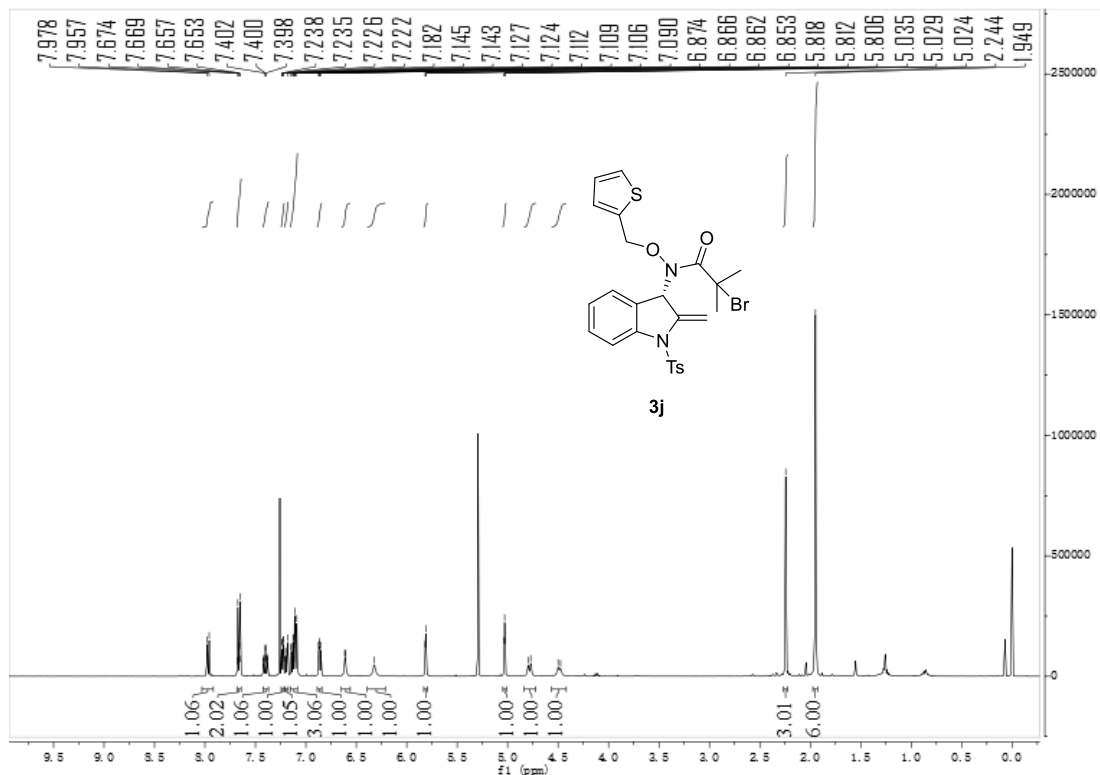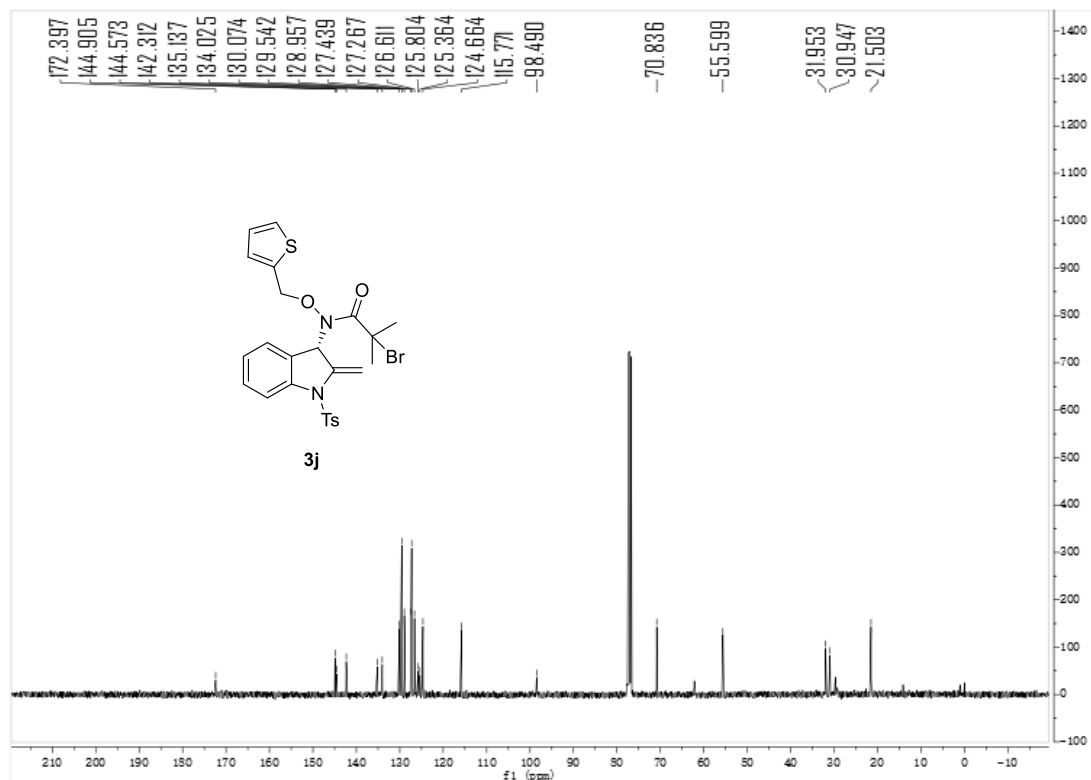

**(S)-2-Bromo-2-methyl-N-(2-methylene-1-tosylindolin-3-yl)-N-(naphthalen-2-ylmethoxy)prop  
anamide (3k)**

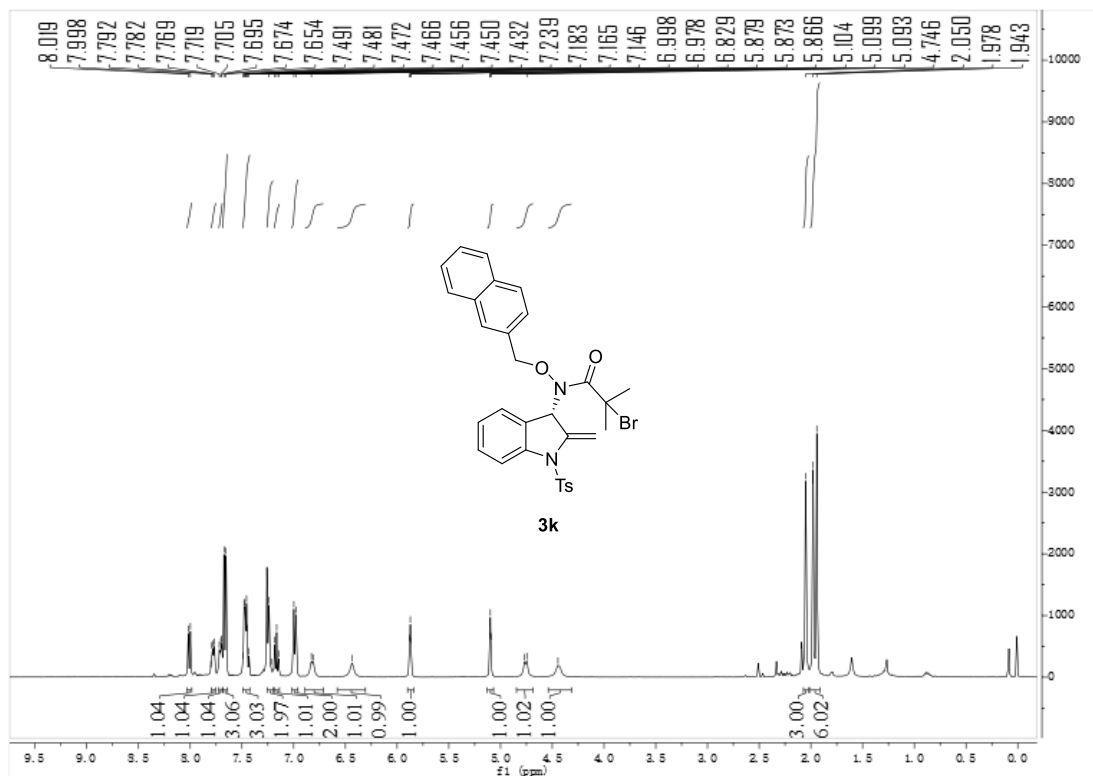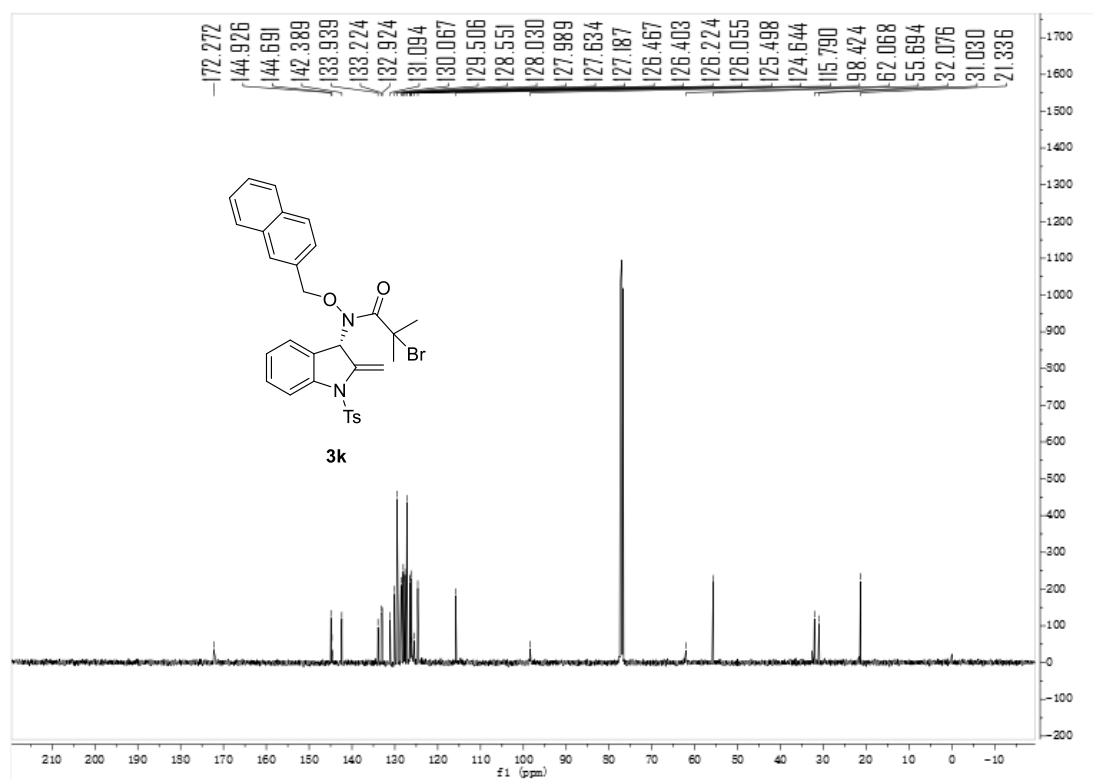



**(S)-N-(Benzyloxy)-N-(2-methylene-1-tosylindolin-3-yl)pivalamide (3I)**

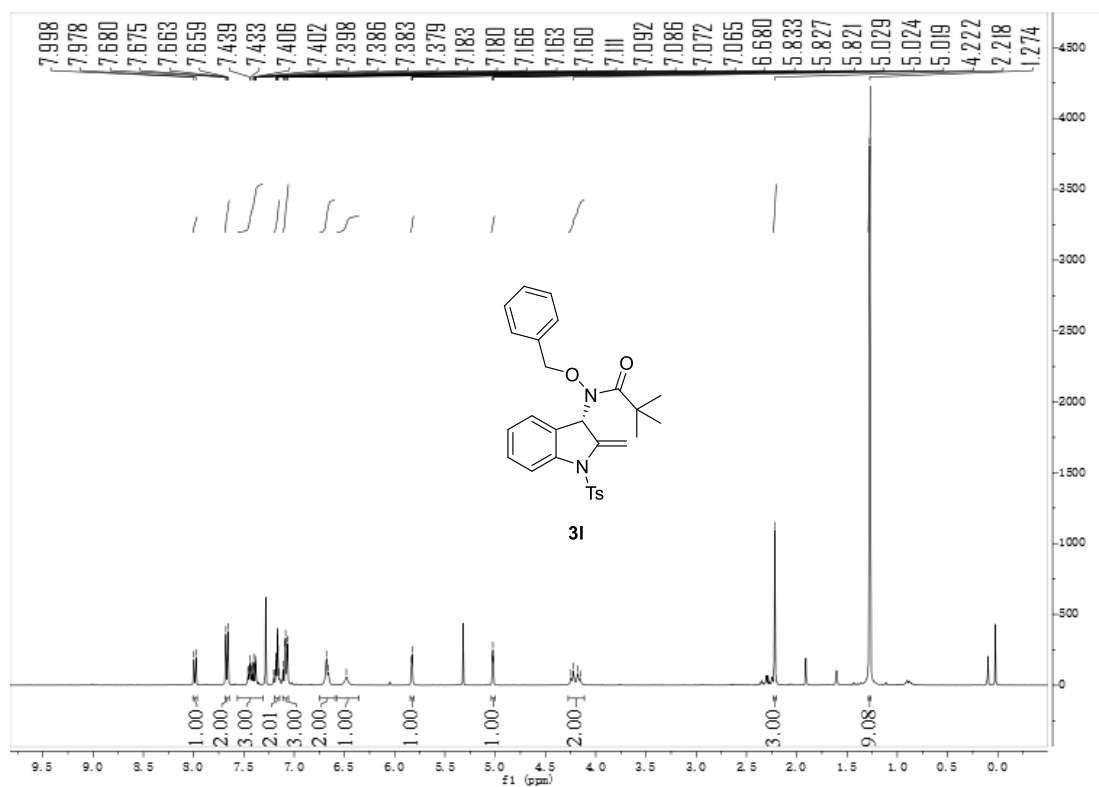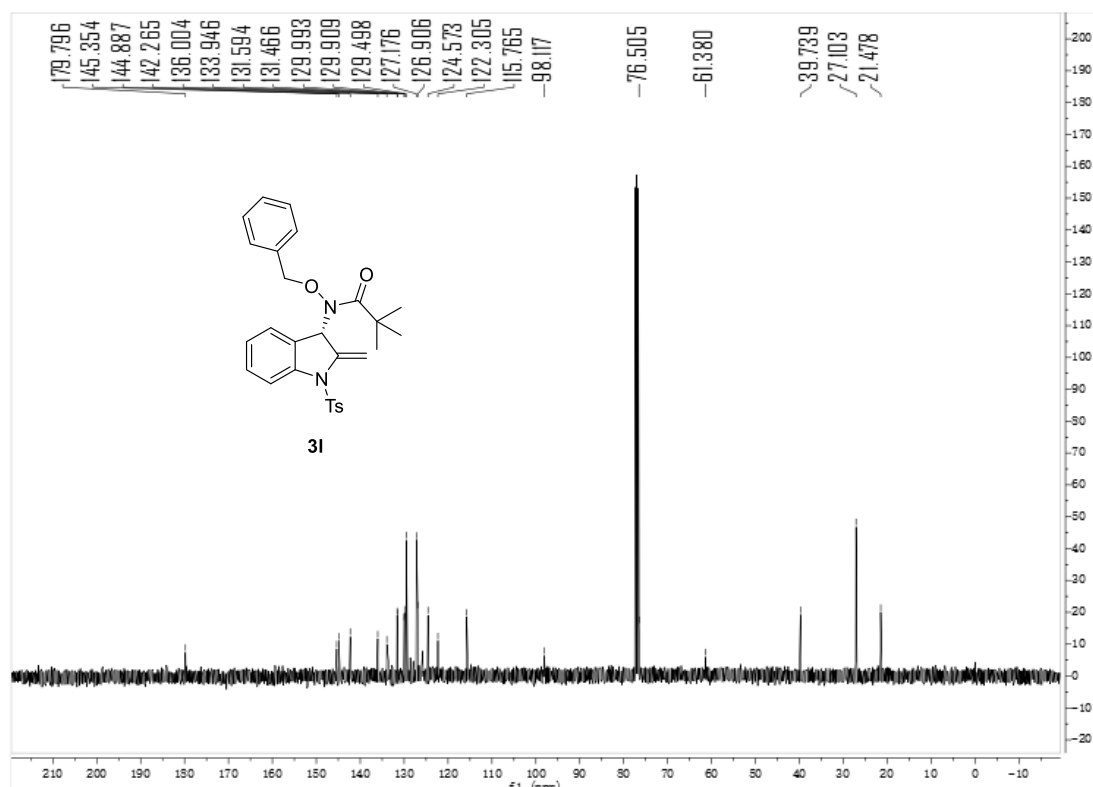

**(S)-N-(Benzyloxy)-2-bromo-2-methyl-N-(4-methyl-2-methylene-1-tosylindolin-3-yl)propanamide (3m)**

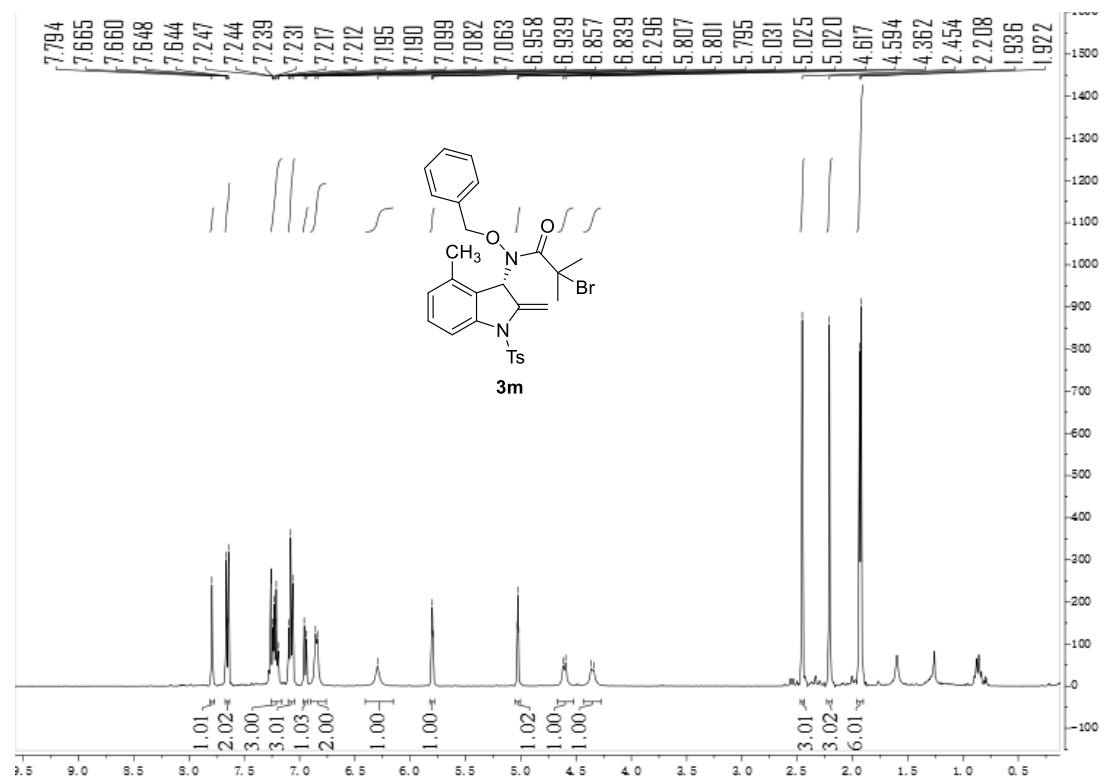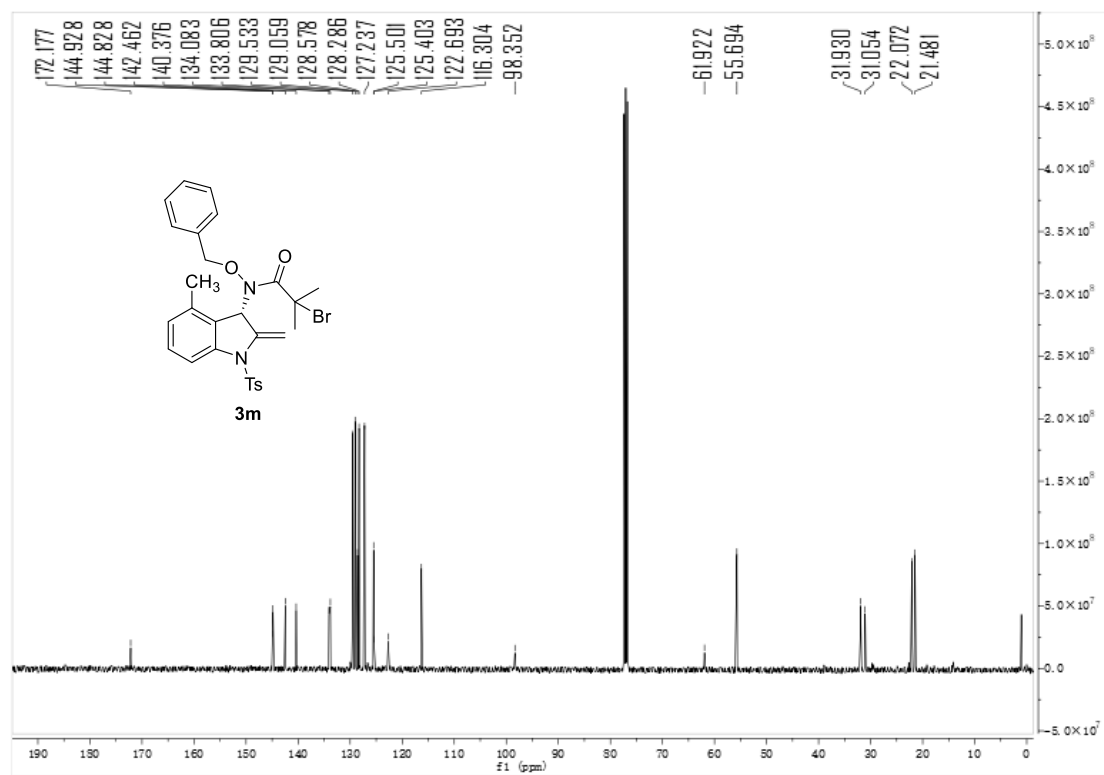

**(S)-N-(Benzyloxy)-2-bromo-N-(5-methoxy-2-methylene-1-tosylindolin-3-yl)-2-methylpropanamide (3n)**

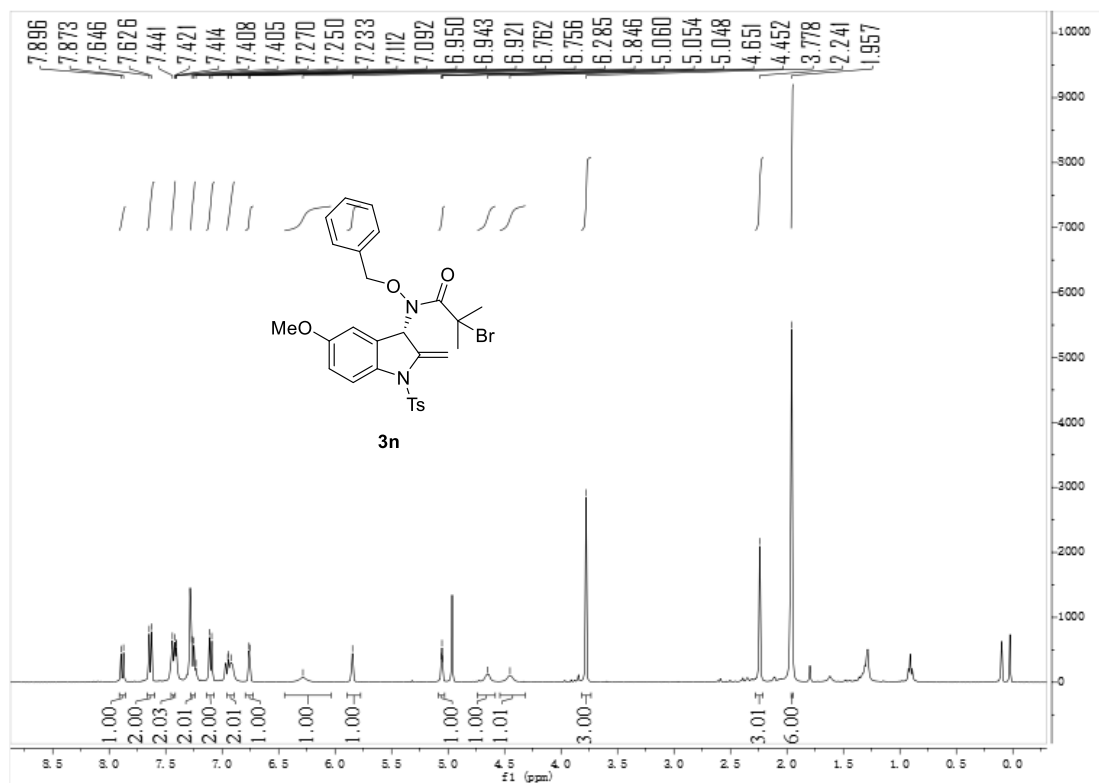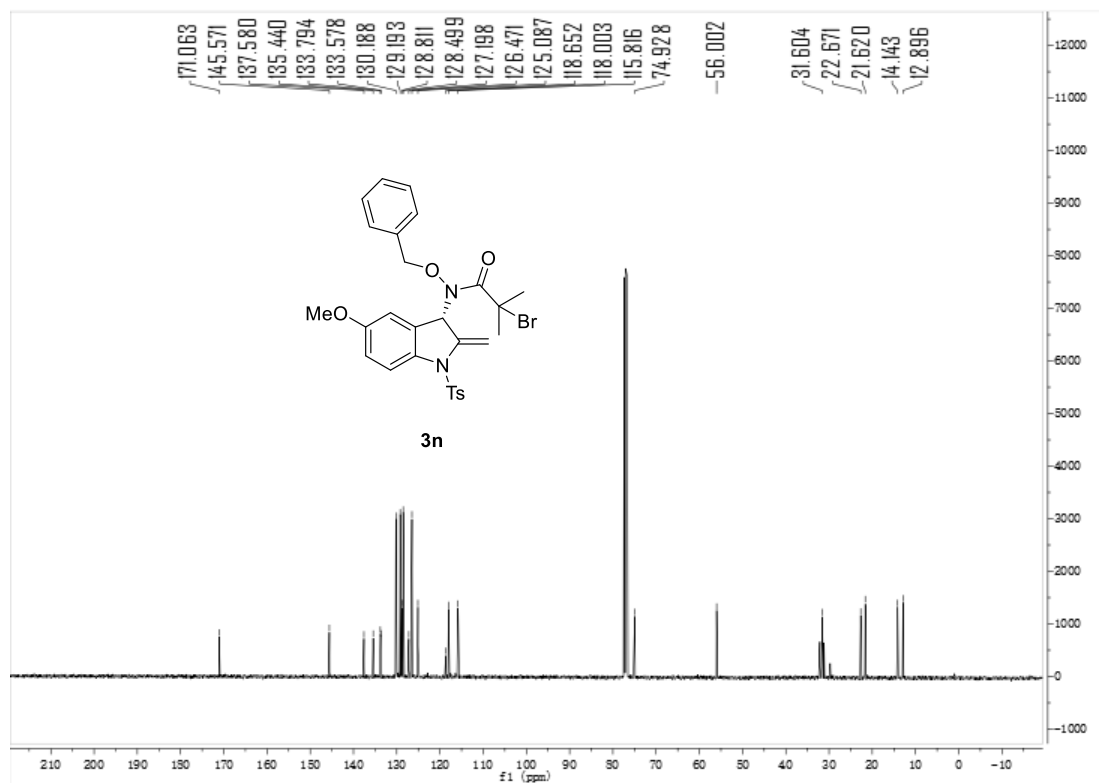

**(S)-N-(Benzyloxy)-2-bromo-2-methyl-N-(5-methyl-2-methylene-1-tosylindolin-3-yl)propanamide (3o)**

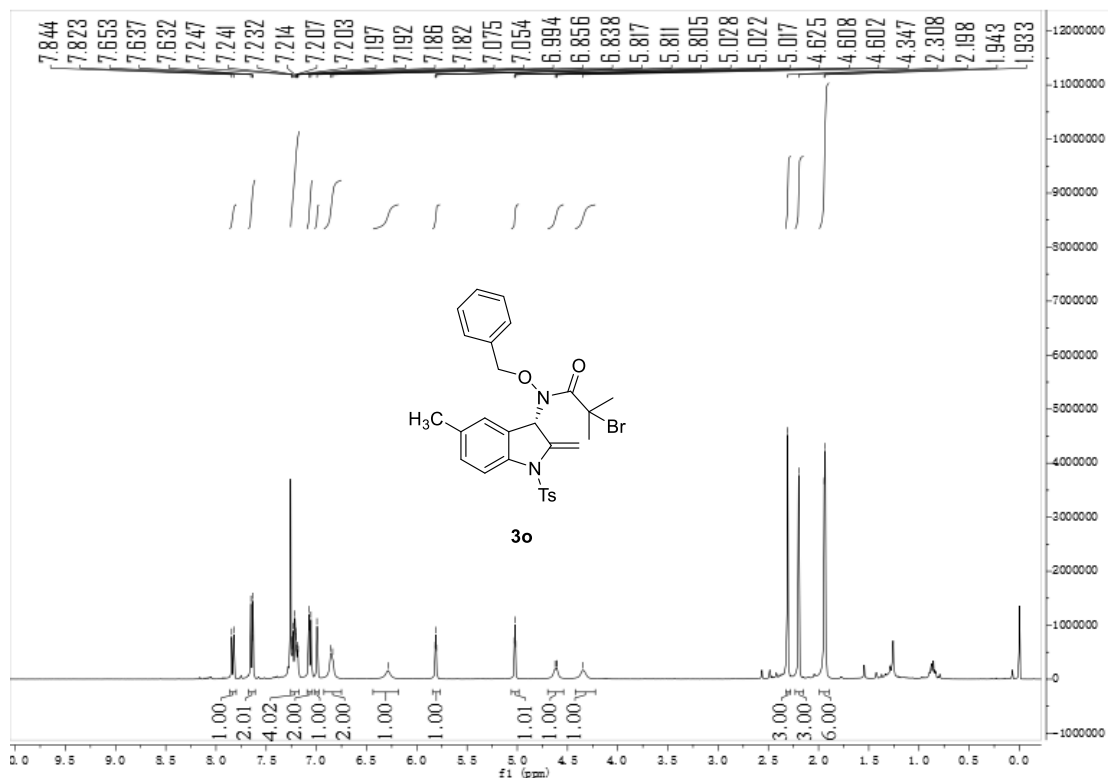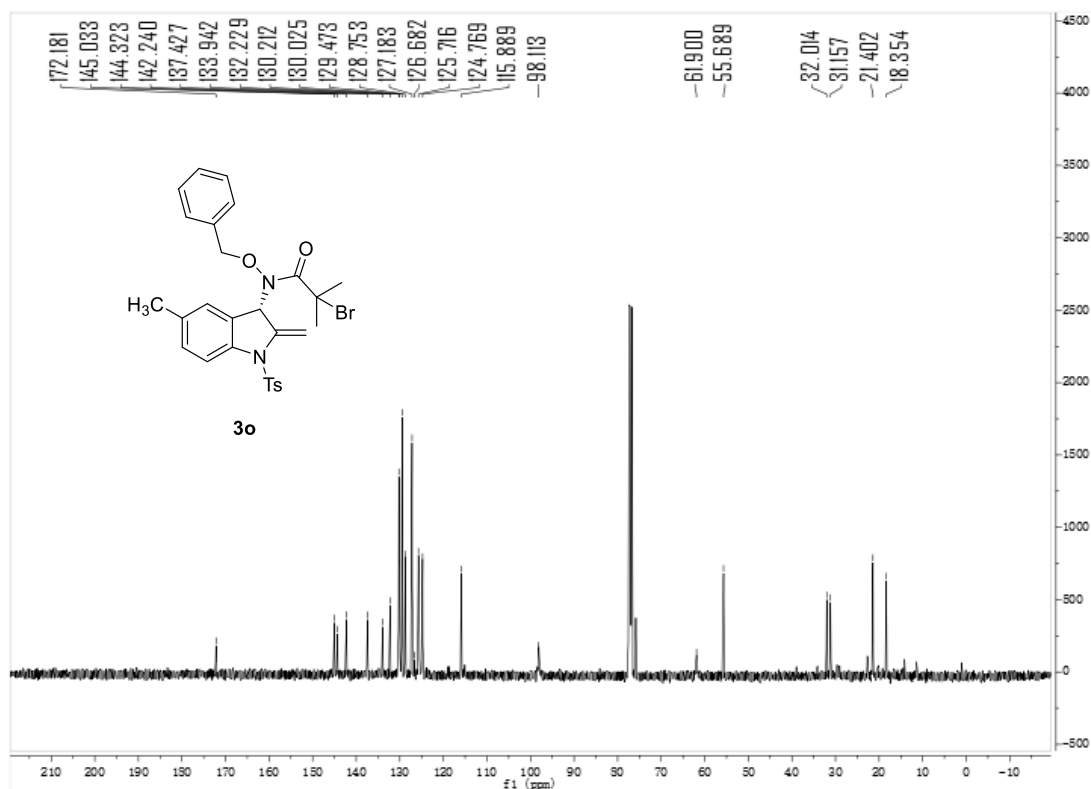

**(S)-N-(Benzyloxy)-2-bromo-N-(5-chloro-2-methylene-1-tosylindolin-3-yl)-2-methylpropanamide (3p)**

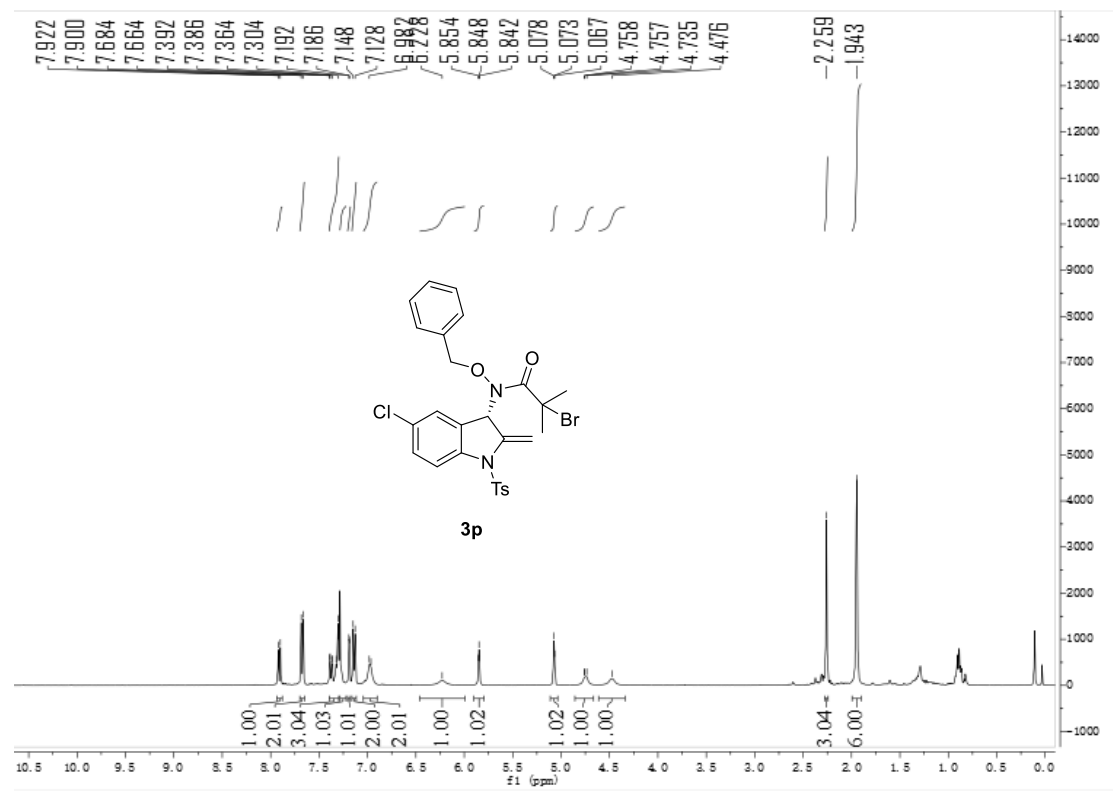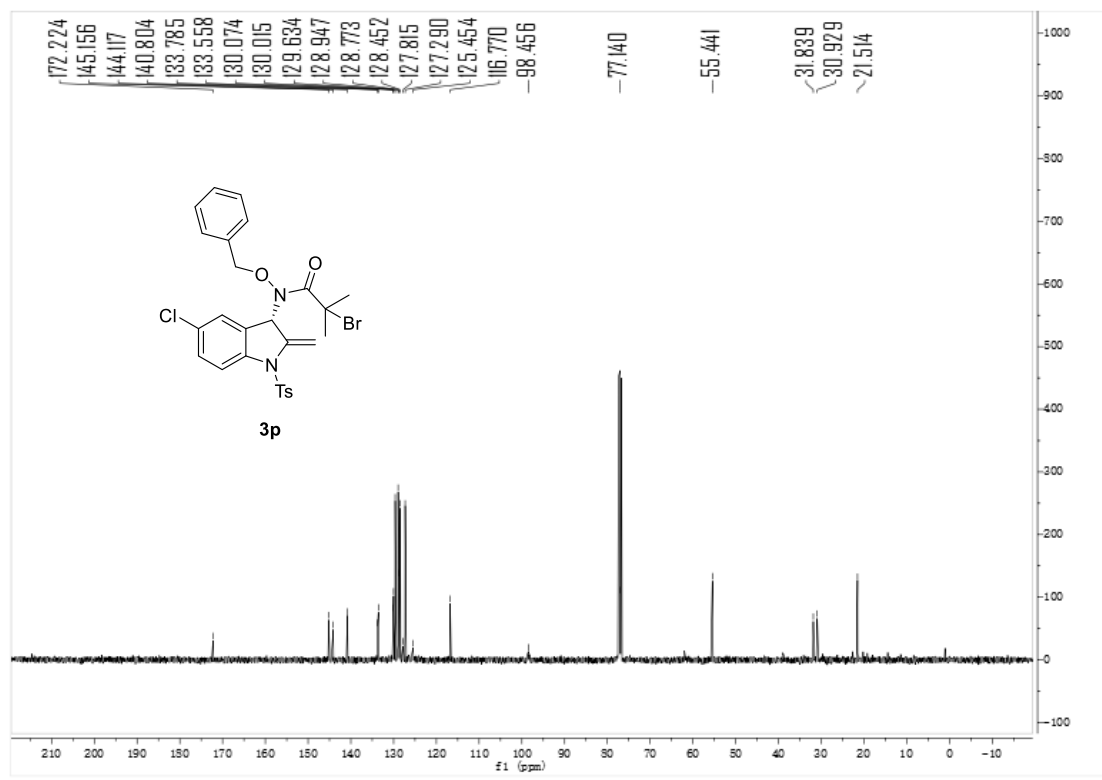

**(S)-N-(Benzyloxy)-2-bromo-N-(5-bromo-2-methylene-1-tosylindolin-3-yl)-2-methylpropanamide (3q)**

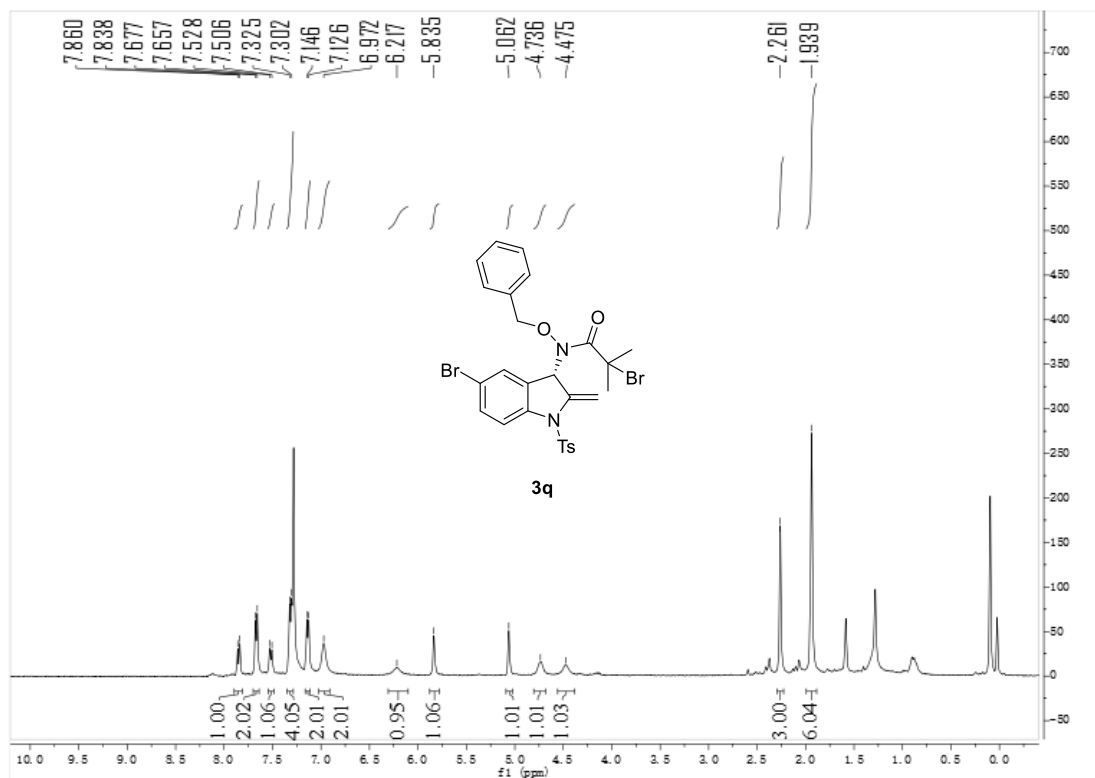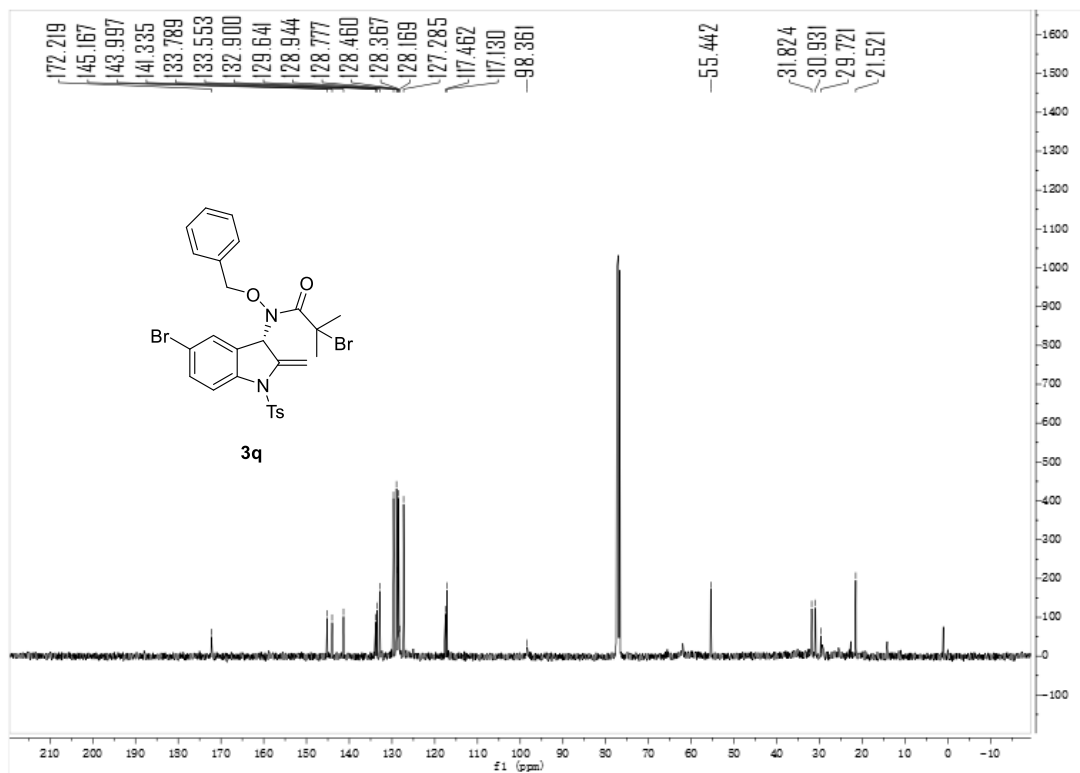

**(S)-N-(Benzyloxy)-2-bromo-N-(6-fluoro-2-methylene-1-tosylindolin-3-yl)-2-methylpropanamide (3r)**

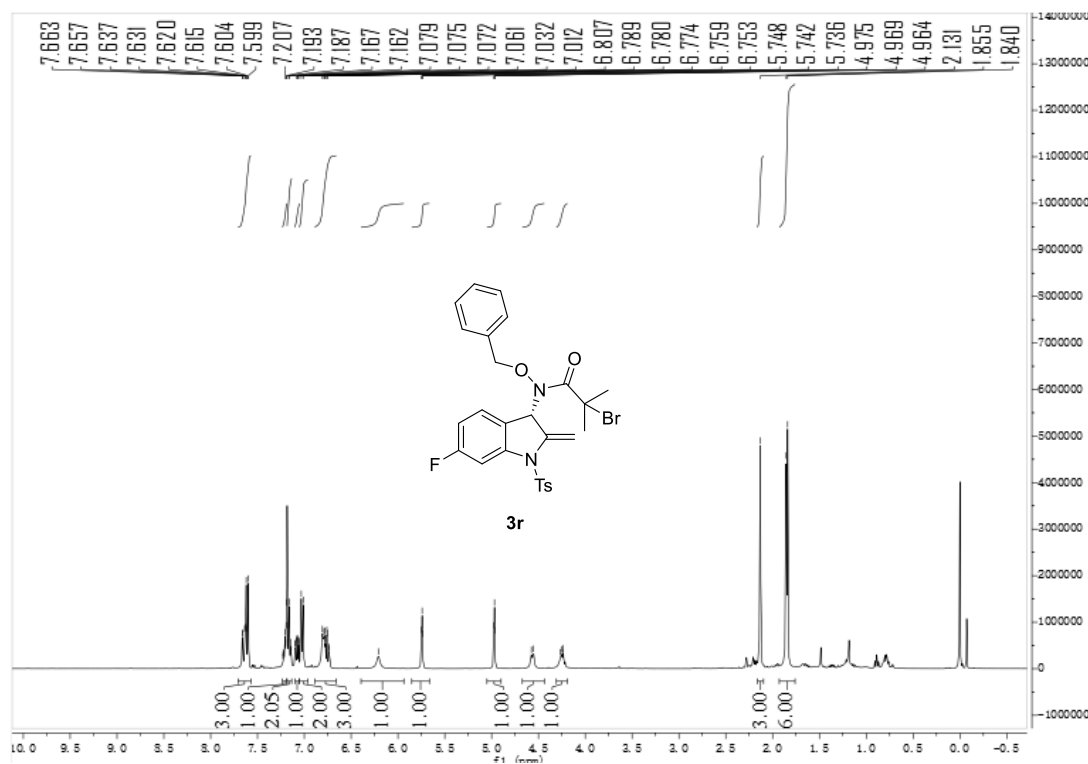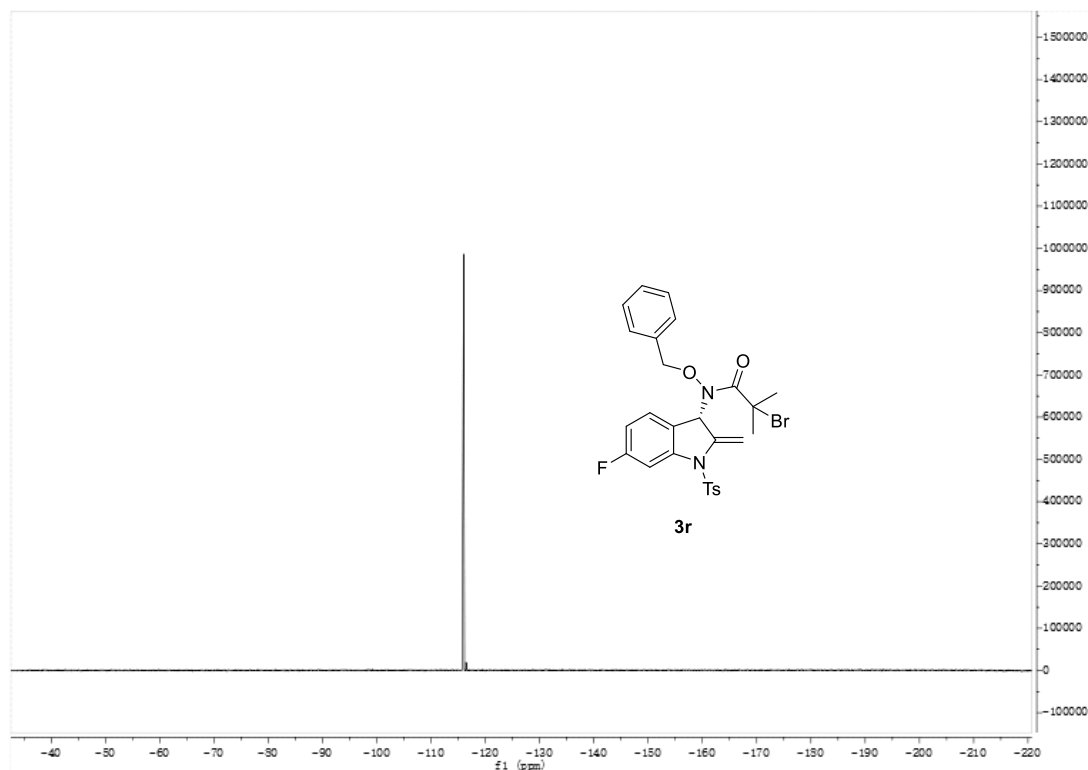

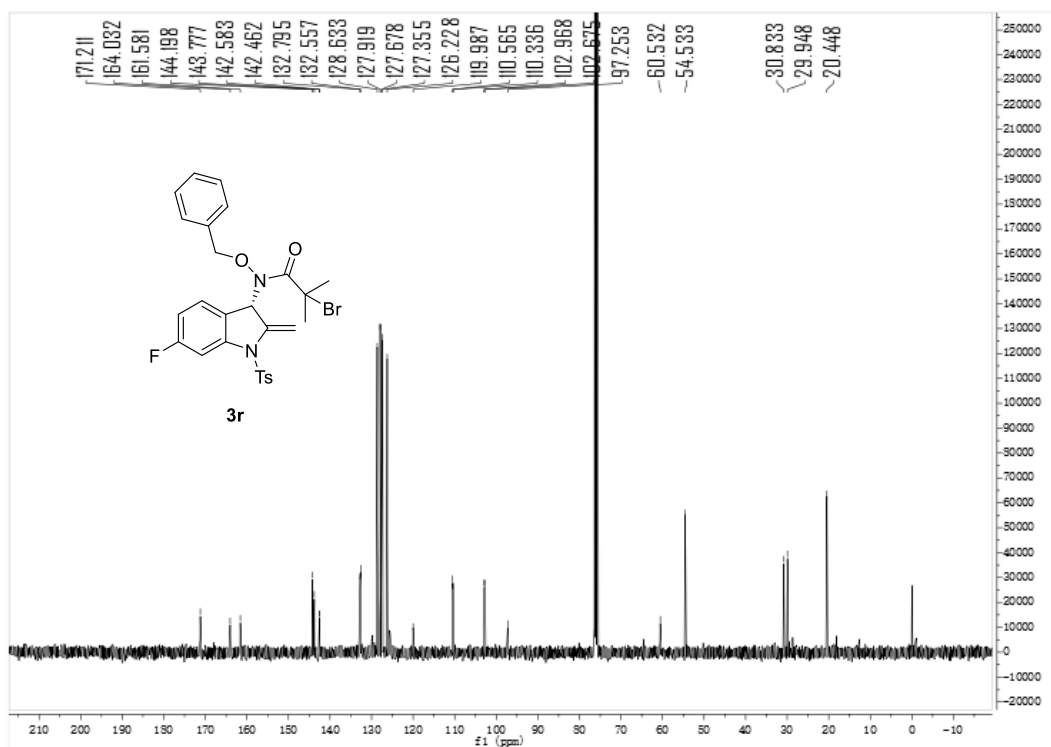

(S)-N-(Benzyloxy)-2-bromo-N-(6-chloro-2-methylene-1-tosylindolin-3-yl)-2-methylpropanamide (3s)

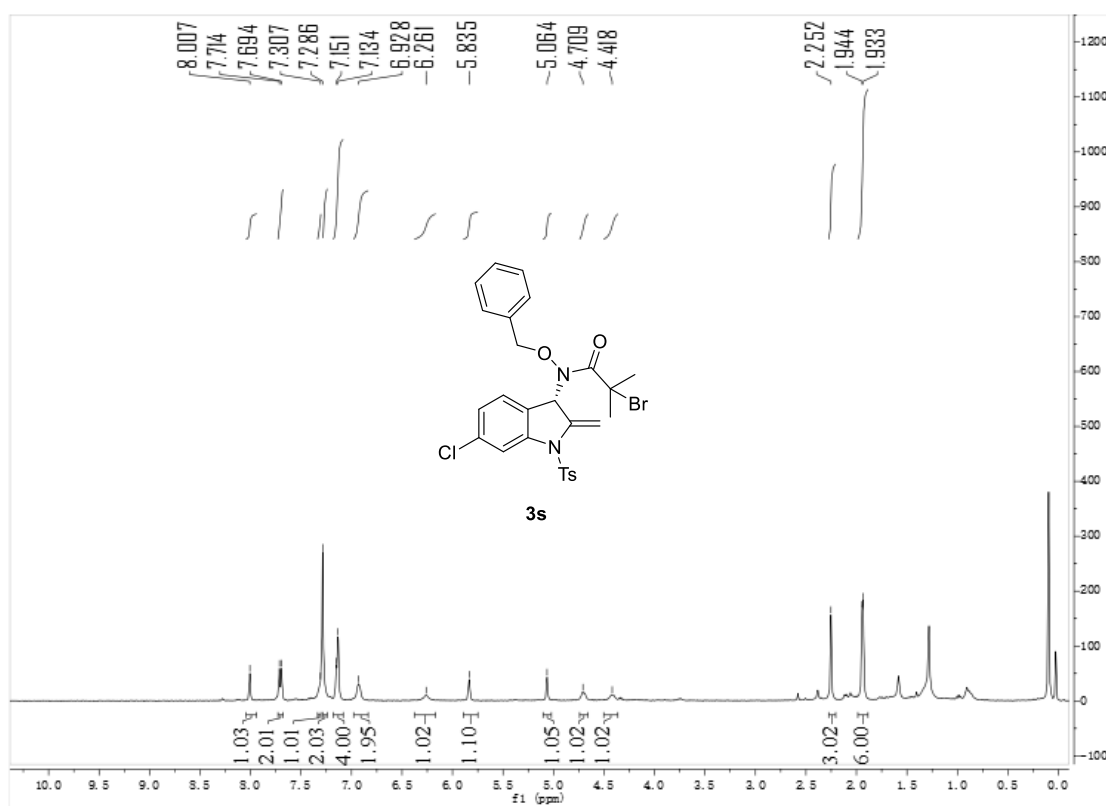



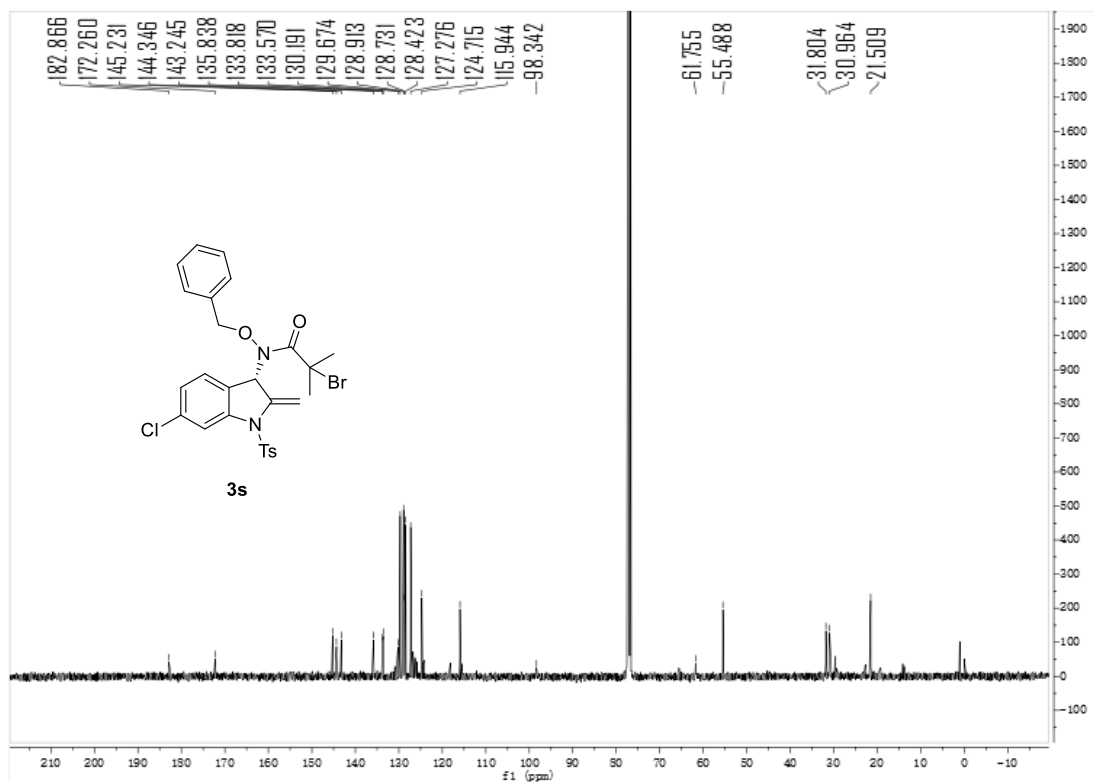

**(S)-N-((3-Methylbenzyloxy)-N-(2-methylene-1-tosylindolin-3-yl)pivalamide (3u)**

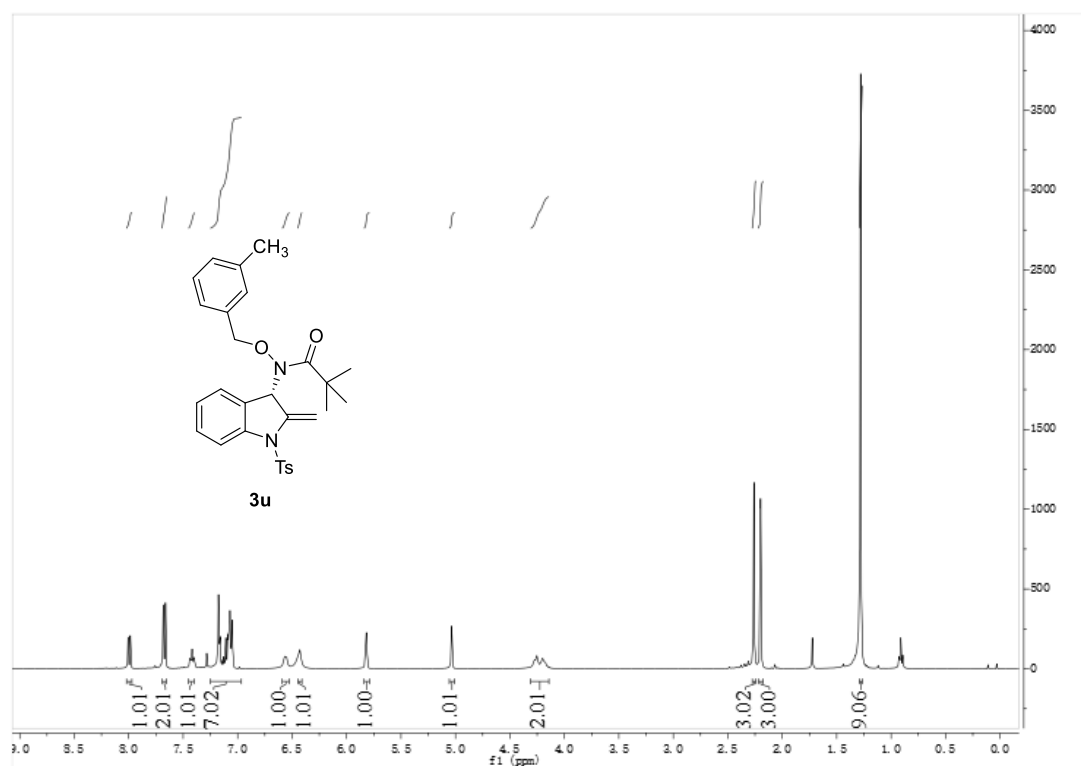

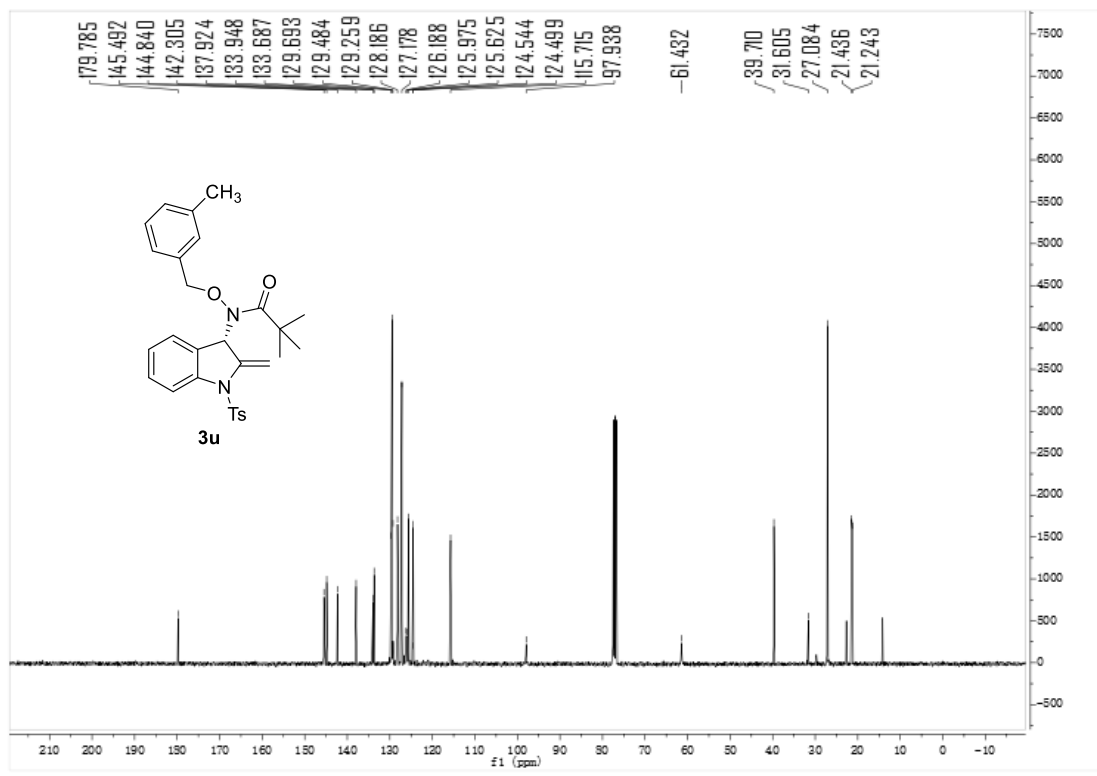

**N-(Benzyloxy)-2-bromo-N-((S)-2-methylene-1-tosylindolin-3-yl)propanamide (3v)**

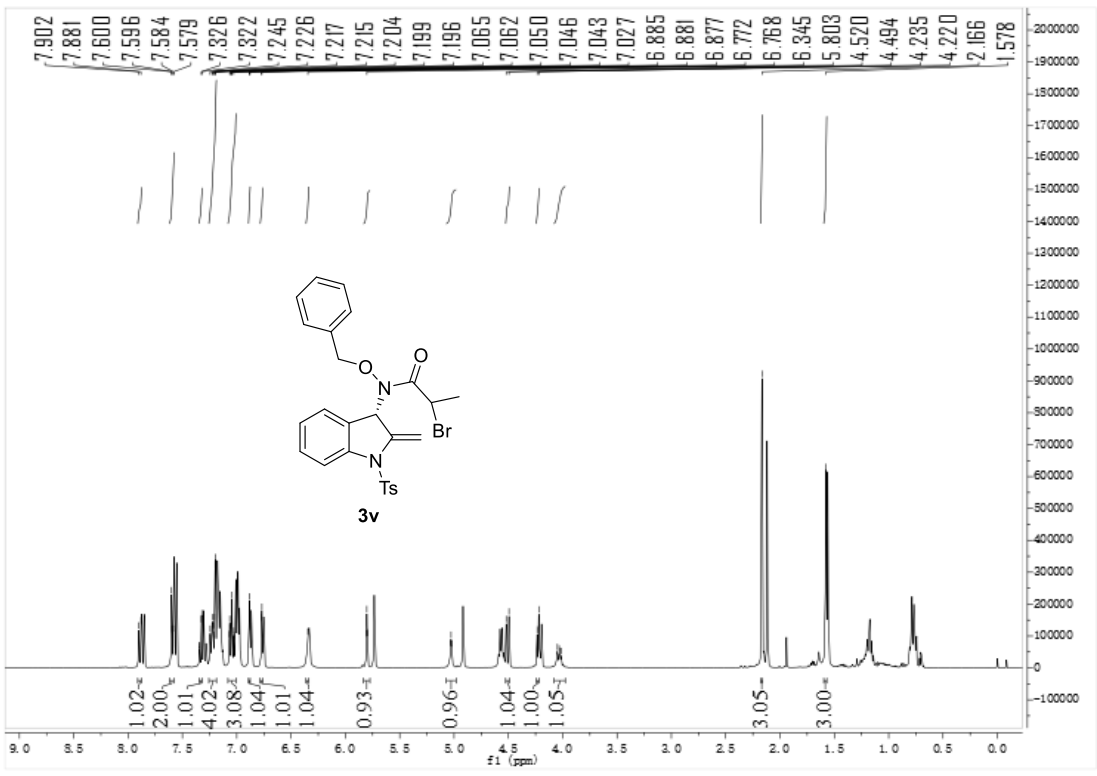

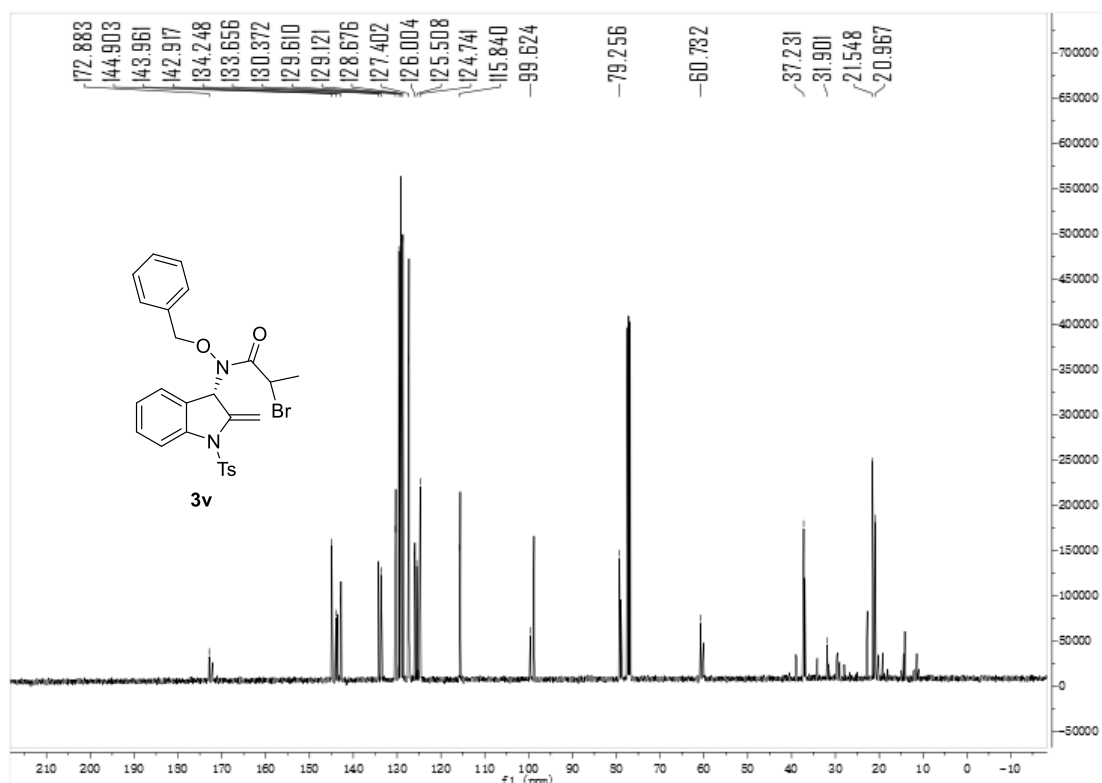

**2-Bromo-2-methyl-N-(2-methyl-1-tosylindolin-3-yl)propanamide (4a)**

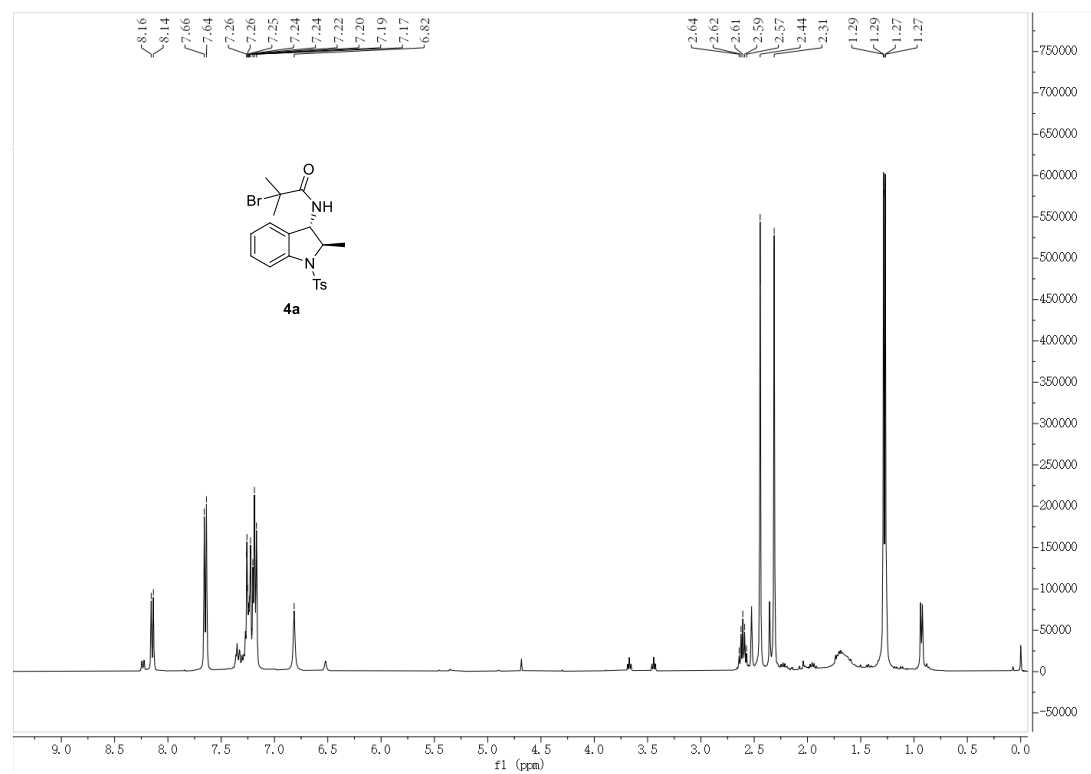

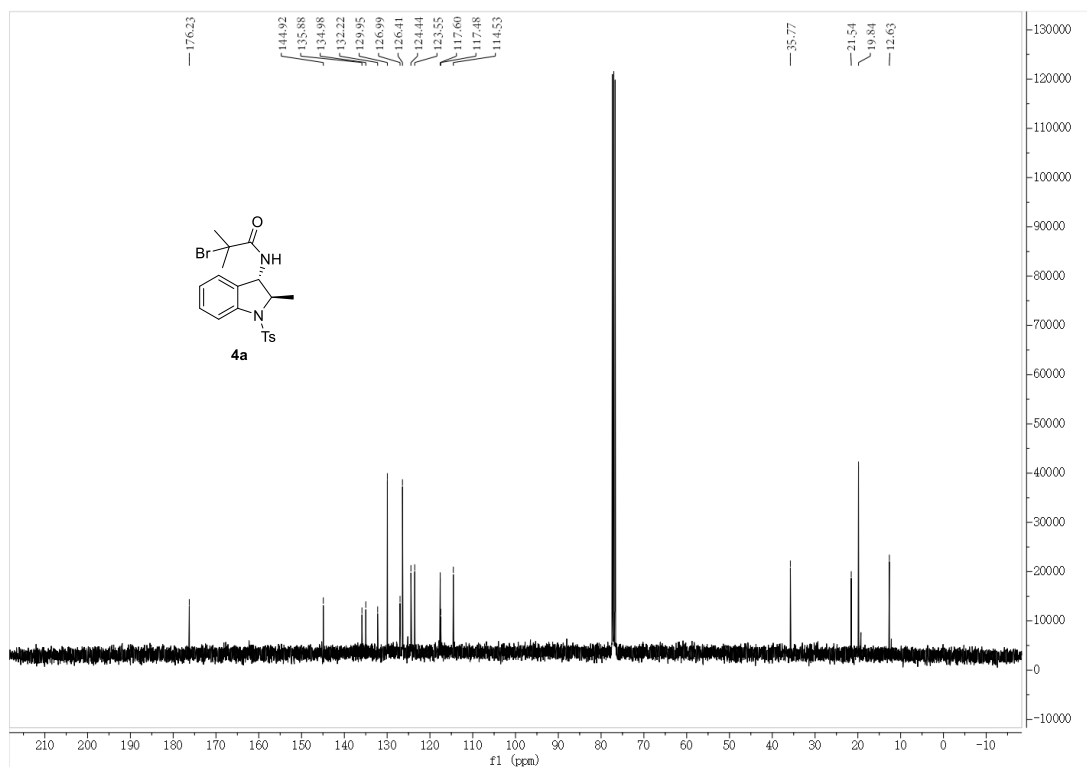

## 9. HPLC analysis

### (S)-N-(Benzyloxy)-2-bromo-2-methyl-N-(2-methylene-1-tosylindolin-3-yl)propanamide (3a)

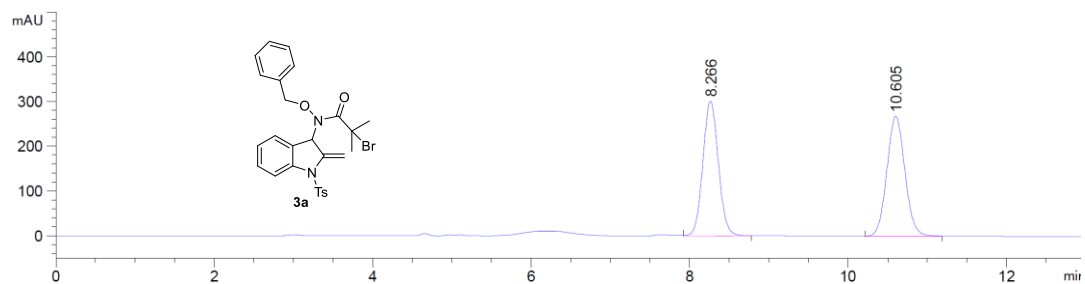

| Peak # | RetTime [min] | Type | Width [min] | Area [mAU*s] | Height [mAU] | Area %  |
|--------|---------------|------|-------------|--------------|--------------|---------|
| 1      | 8.266         | VB   | 0.2108      | 4095.63599   | 300.81244    | 49.1807 |
| 2      | 10.605        | BB   | 0.2465      | 4232.08740   | 267.59000    | 50.8193 |

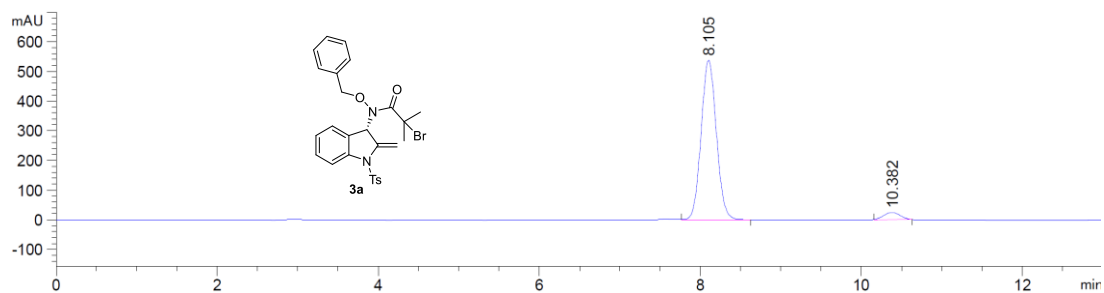

| Peak # | RetTime [min] | Type | Width [min] | Area [mAU*s] | Height [mAU] | Area %  |
|--------|---------------|------|-------------|--------------|--------------|---------|
| 1      | 8.105         | VB   | 0.2061      | 7099.11035   | 537.44067    | 95.3038 |
| 2      | 10.382        | MM R | 0.2362      | 349.81824    | 24.68545     | 4.6962  |

**(S)-2-Bromo-2-methyl-N-((2-methylbenzyl)oxy)-N-(2-methylene-1-tosylindolin-3-yl)propanamide (3b)**

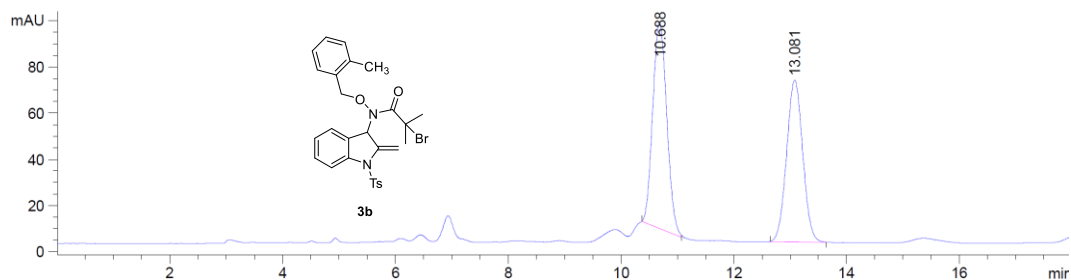

| Peak # | RetTime [min] | Type | Width [min] | Area [mAU*s] | Height [mAU] | Area %  |
|--------|---------------|------|-------------|--------------|--------------|---------|
| 1      | 10.688        | MM R | 0.2879      | 1540.93823   | 89.20995     | 52.4158 |
| 2      | 13.081        | BB   | 0.3106      | 1398.89844   | 70.17805     | 47.5842 |

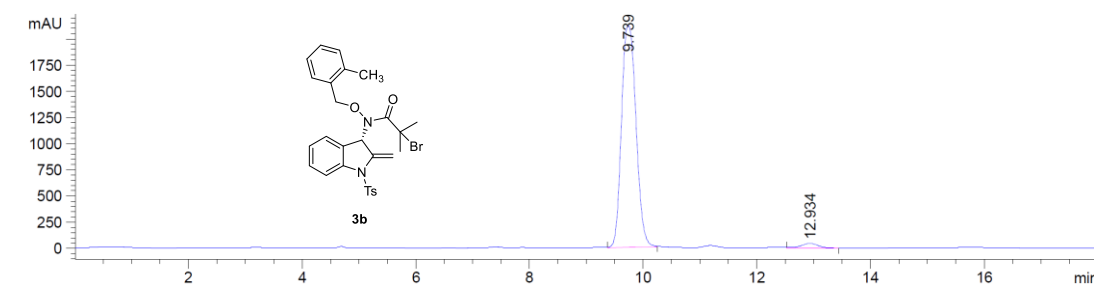

| Peak # | RetTime [min] | Type | Width [min] | Area [mAU*s] | Height [mAU] | Area %  |
|--------|---------------|------|-------------|--------------|--------------|---------|
| 1      | 9.739         | MM R | 0.2940      | 3.74368e4    | 2122.28491   | 97.6240 |
| 2      | 12.934        | VB   | 0.3169      | 911.15863    | 44.12291     | 2.3760  |

**(S)-2-Bromo-2-methyl-N-((3-methylbenzyl)oxy)-N-(2-methylene-1-tosylindolin-3-yl)propanamide (3c)**

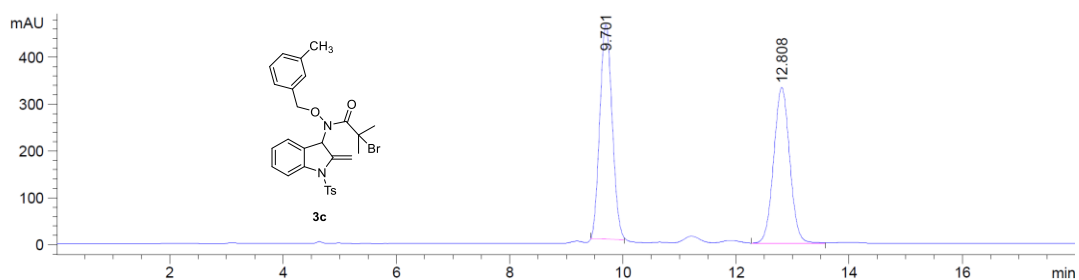

| Peak # | RetTime [min] | Type | Width [min] | Area [mAU*s] | Height [mAU] | Area %  |
|--------|---------------|------|-------------|--------------|--------------|---------|
| 1      | 9.701         | MM R | 0.2525      | 6934.50977   | 457.72009    | 51.4383 |
| 2      | 12.808        | VB   | 0.3060      | 6546.71387   | 332.09341    | 48.5617 |

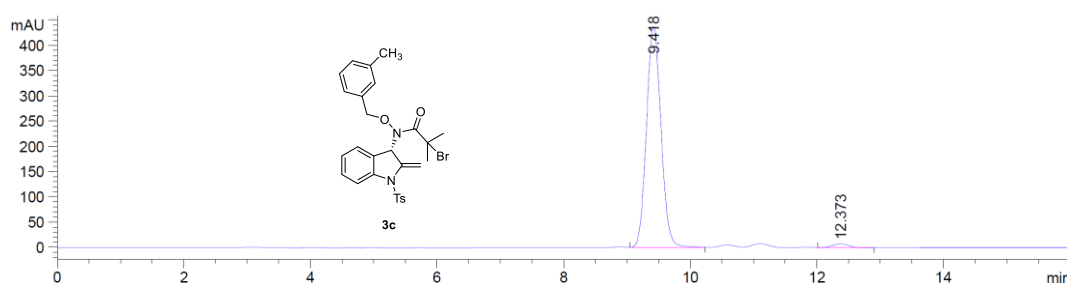

| Peak # | RetTime [min] | Type | Width [min] | Area [mAU*s] | Height [mAU] | Area %  |
|--------|---------------|------|-------------|--------------|--------------|---------|
| 1      | 9.418         | VB   | 0.2490      | 7006.99121   | 437.21567    | 98.1587 |
| 2      | 12.373        | BB   | 0.2913      | 131.43637    | 7.18949      | 1.8413  |

**(S)-2-Bromo-2-methyl-N-((4-methylbenzyl)oxy)-N-(2-methylene-1-tosylindolin-3-yl)propanamide (3d)**

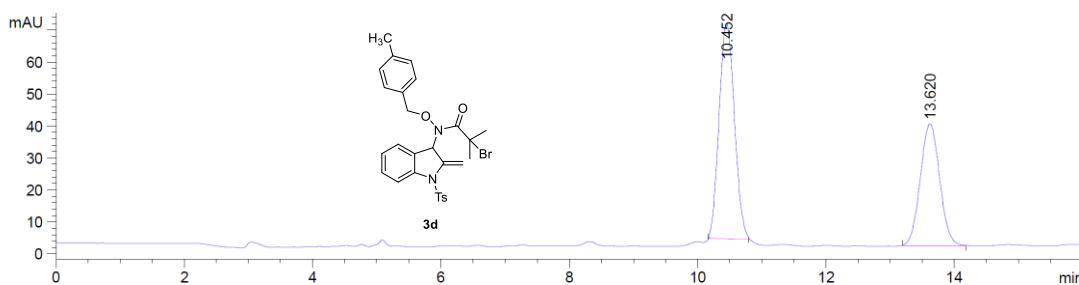

| Peak # | RetTime [min] | Type | Width [min] | Area [mAU*s] | Height [mAU] | Area %  |
|--------|---------------|------|-------------|--------------|--------------|---------|
| 1      | 10.452        | MM R | 0.2766      | 1113.26782   | 67.09181     | 58.1427 |
| 2      | 13.620        | BB   | 0.3248      | 801.44763    | 38.19431     | 41.8573 |

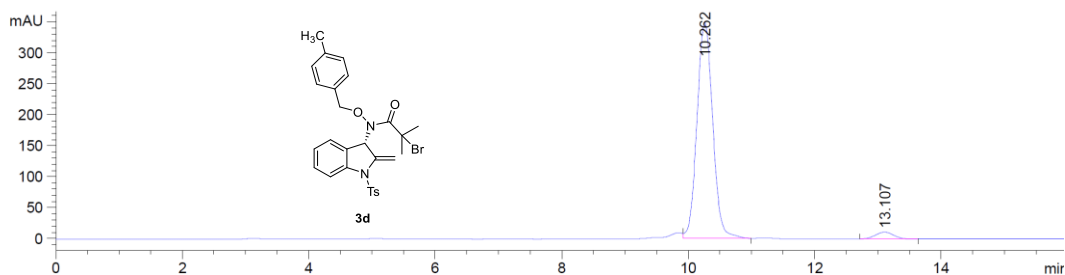

| Peak # | RetTime [min] | Type | Width [min] | Area [mAU*s] | Height [mAU] | Area %  |
|--------|---------------|------|-------------|--------------|--------------|---------|
| 1      | 10.262        | VB   | 0.2716      | 6030.95605   | 348.94528    | 96.4527 |
| 2      | 13.107        | BB   | 0.3114      | 221.80266    | 11.08792     | 3.5473  |

**(S)-2-Bromo-N-((2-bromobenzyl)oxy)-2-methyl-N-(2-methylene-1-tosylindolin-3-yl)propanamide (3e)**

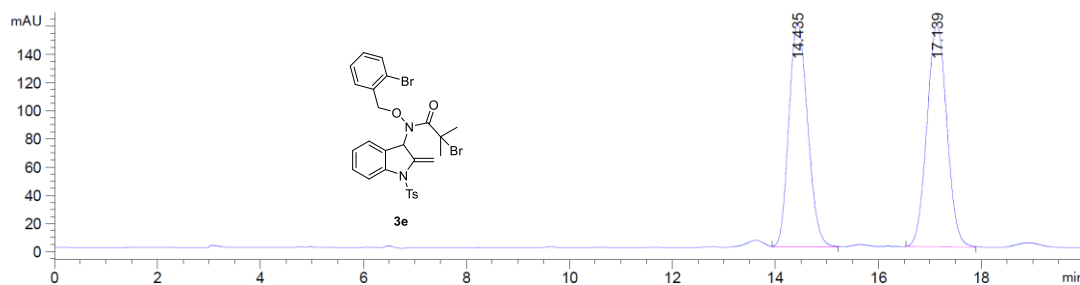

| Peak # | RetTime [min] | Type | Width [min] | Area [mAU*s] | Height [mAU] | Area %  |
|--------|---------------|------|-------------|--------------|--------------|---------|
| 1      | 14.435        | VB   | 0.4020      | 4019.47827   | 158.42595    | 48.7142 |
| 2      | 17.139        | BB   | 0.4189      | 4231.65918   | 157.77069    | 51.2858 |

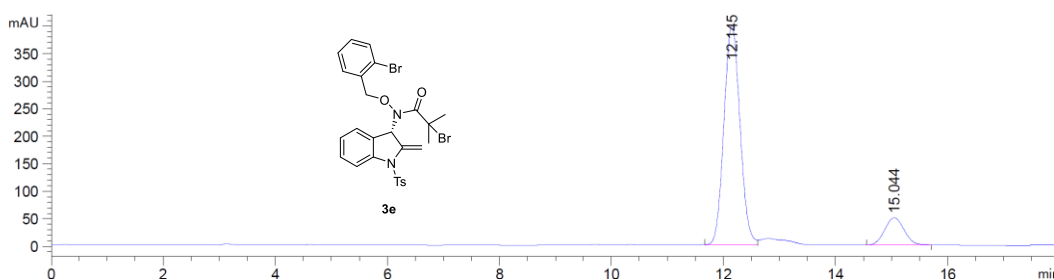

| Peak # | RetTime [min] | Type | Width [min] | Area [mAU*s] | Height [mAU] | Area %  |
|--------|---------------|------|-------------|--------------|--------------|---------|
| 1      | 12.145        | BV   | 0.3143      | 7947.54297   | 399.22491    | 86.9564 |
| 2      | 15.044        | BB   | 0.3787      | 1192.14197   | 49.55152     | 13.0436 |

**(S)-2-Bromo-N-((3-bromobenzyl)oxy)-2-methyl-N-(2-methylene-1-tosylindolin-3-yl)propanamide**

**mide (3f)**

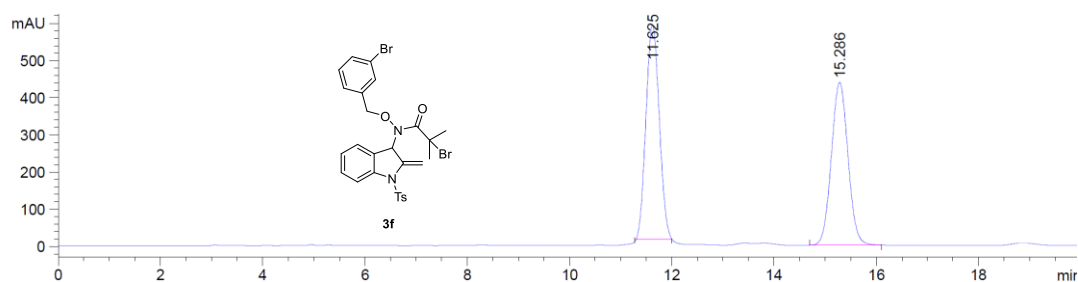

| Peak # | RetTime [min] | Type | Width [min] | Area [mAU*s] | Height [mAU] | Area %  |
|--------|---------------|------|-------------|--------------|--------------|---------|
| 1      | 11.625        | MM R | 0.3020      | 1.04316e4    | 575.74109    | 51.3088 |
| 2      | 15.286        | BB   | 0.3521      | 9899.39648   | 437.27695    | 48.6912 |

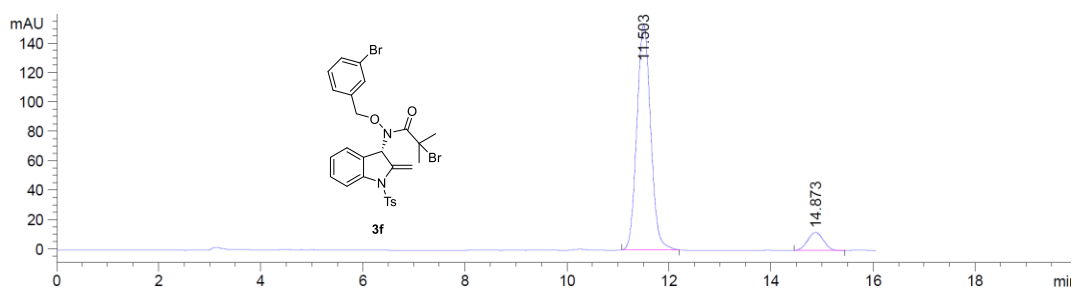

| Peak # | RetTime [min] | Type | Width [min] | Area [mAU*s] | Height [mAU] | Area %  |
|--------|---------------|------|-------------|--------------|--------------|---------|
| 1      | 11.503        | BB   | 0.2973      | 2898.70630   | 152.84995    | 91.5935 |
| 2      | 14.873        | BB   | 0.3322      | 266.04453    | 12.40339     | 8.4065  |

**(S)-2-Bromo-N-((4-bromobenzyl)oxy)-2-methyl-N-(2-methylene-1-tosylindolin-3-yl)propana**

**mide (3g)**

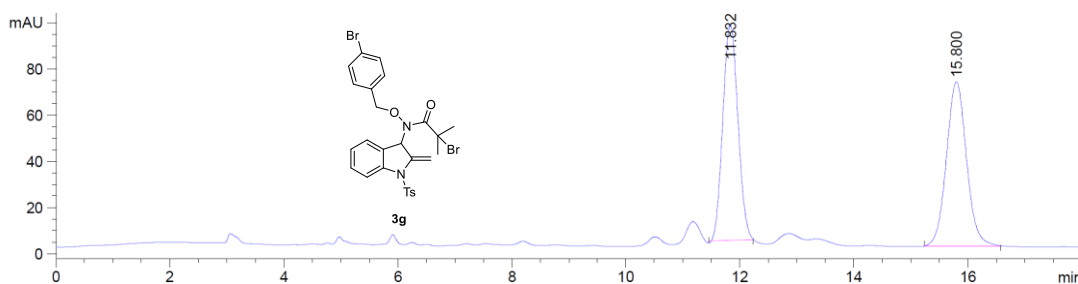

| Peak # | RetTime [min] | Type | Width [min] | Area [mAU*s] | Height [mAU] | Area %  |
|--------|---------------|------|-------------|--------------|--------------|---------|
| 1      | 11.832        | MM R | 0.3060      | 1717.83191   | 93.54917     | 49.4803 |
| 2      | 15.800        | BB   | 0.3788      | 1753.91956   | 71.33910     | 50.5197 |



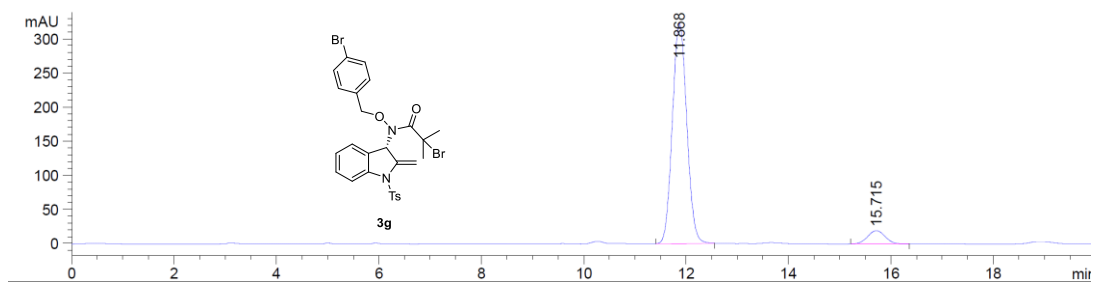

| Peak # | RetTime [min] | Type | Width [min] | Area [mAU*s] | Height [mAU] | Area %  |
|--------|---------------|------|-------------|--------------|--------------|---------|
| 1      | 11.868        | BB   | 0.3087      | 6329.94287   | 322.91061    | 93.1754 |
| 2      | 15.715        | BB   | 0.3732      | 463.63763    | 19.51573     | 6.8246  |

**(S)-2-Bromo-2-methyl-N-(2-methylene-1-tosylindolin-3-yl)-N-((2-nitrobenzyl)oxy)propanamide (3h)**

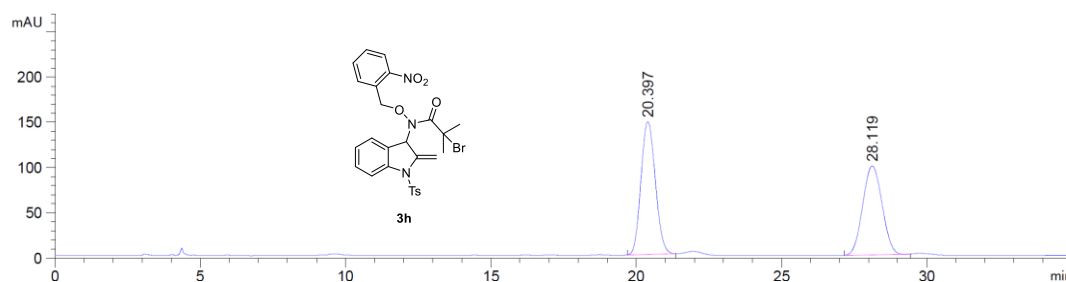

| Peak # | RetTime [min] | Type | Width [min] | Area [mAU*s] | Height [mAU] | Area %  |
|--------|---------------|------|-------------|--------------|--------------|---------|
| 1      | 20.397        | BB   | 0.5438      | 5059.26563   | 146.90410    | 52.7727 |
| 2      | 28.119        | BB   | 0.7337      | 4527.64111   | 98.23447     | 47.2273 |

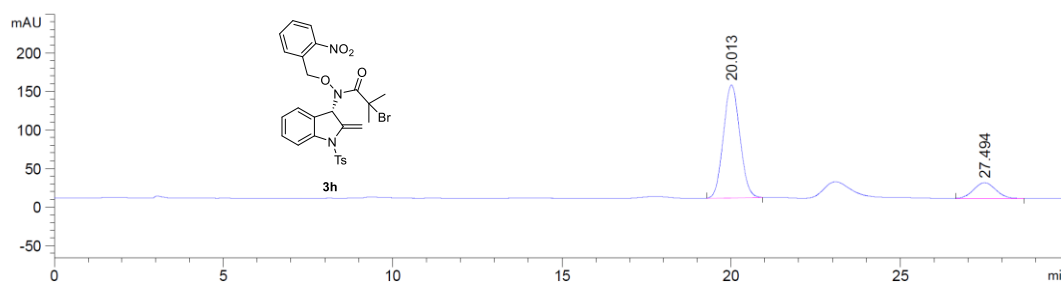

| Peak # | RetTime [min] | Type | Width [min] | Area [mAU*s] | Height [mAU] | Area %  |
|--------|---------------|------|-------------|--------------|--------------|---------|
| 1      | 20.013        | BB   | 0.5273      | 4955.48242   | 146.26797    | 84.5142 |
| 2      | 27.494        | BB   | 0.6621      | 908.01160    | 20.13618     | 15.4858 |

**(S)-2-Bromo-N-((4-(tert-butyl)benzyl)oxy)-2-methyl-N-(2-methylene-1-tosylindolin-3-yl)prop**

**anamide (3i)**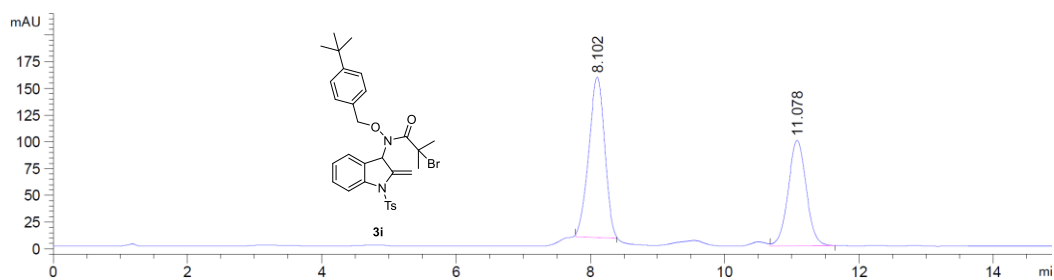

| Peak # | RetTime [min] | Type | Width [min] | Area [mAU*s] | Height [mAU] | Area %  |
|--------|---------------|------|-------------|--------------|--------------|---------|
| 1      | 8.102         | MM R | 0.2743      | 2467.32739   | 149.93425    | 57.2067 |
| 2      | 11.078        | VB   | 0.2882      | 1845.67664   | 98.67152     | 42.7933 |

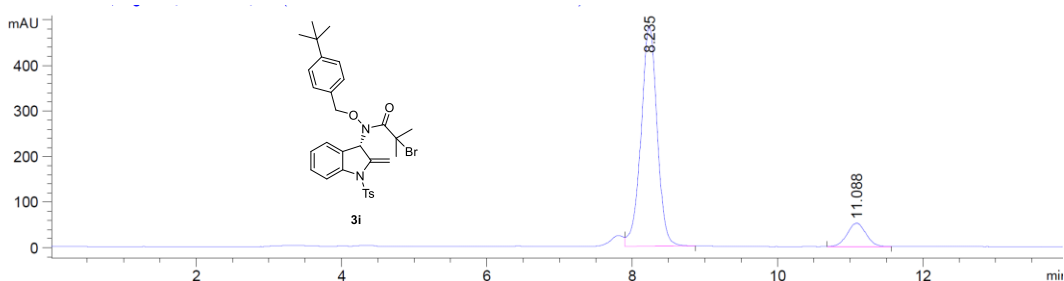

| Peak # | RetTime [min] | Type | Width [min] | Area [mAU*s] | Height [mAU] | Area %  |
|--------|---------------|------|-------------|--------------|--------------|---------|
| 1      | 8.235         | VB   | 0.2362      | 7457.28271   | 482.71515    | 88.9686 |
| 2      | 11.088        | BB   | 0.2783      | 924.64154    | 51.30435     | 11.0314 |

**(S)-2-Bromo-2-methyl-N-(2-methylene-1-tosylindolin-3-yl)-N-(thiophen-2-ylmethoxy)propanamide (3j)****amide (3j)**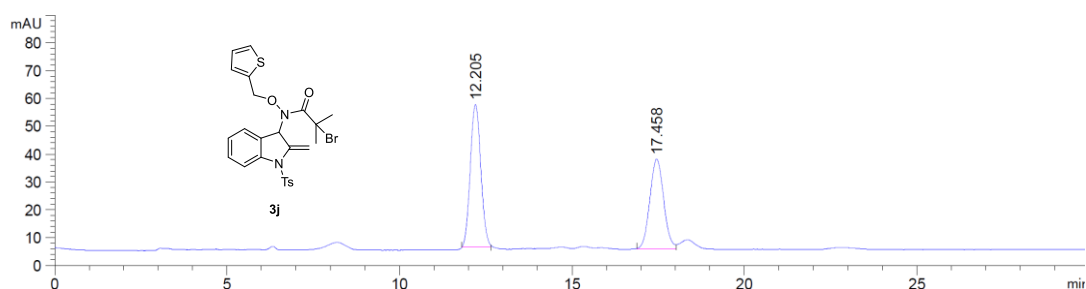

| Peak # | RetTime [min] | Type | Width [min] | Area [mAU*s] | Height [mAU] | Area %  |
|--------|---------------|------|-------------|--------------|--------------|---------|
| 1      | 12.205        | MM R | 0.3542      | 1087.42798   | 51.16527     | 54.5912 |
| 2      | 17.458        | BV   | 0.4402      | 904.51929    | 32.34726     | 45.4088 |

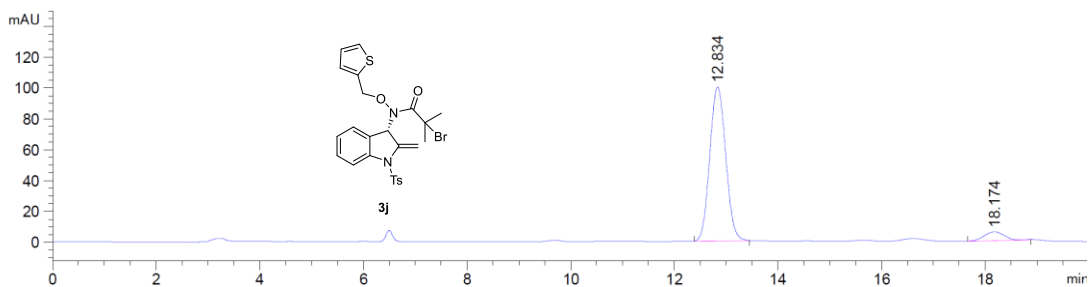

| Peak # | RetTime [min] | Type | Width [min] | Area [mAU*s] | Height [mAU] | Area %  |
|--------|---------------|------|-------------|--------------|--------------|---------|
| 1      | 12.834        | BB   | 0.3353      | 2135.30176   | 99.92389     | 93.2438 |
| 2      | 18.174        | BB   | 0.4222      | 154.71880    | 5.70914      | 6.7562  |

**(S)-2-Bromo-2-methyl-N-(2-methylene-1-tosylindolin-3-yl)-N-(naphthalen-2-ylmethoxy)prop  
anamide (3k)**

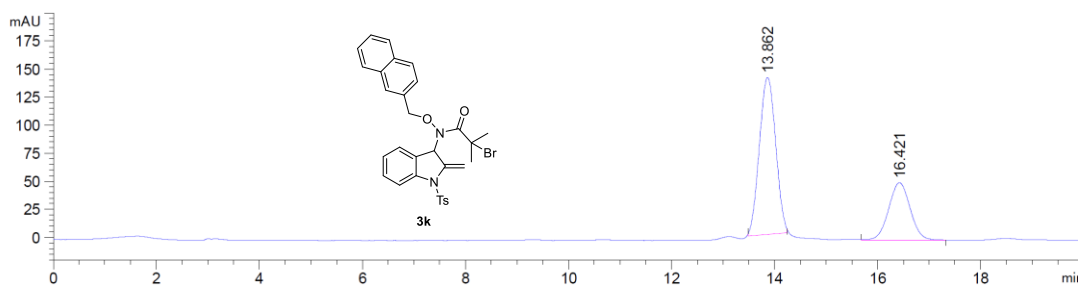

| Peak # | RetTime [min] | Type | Width [min] | Area [mAU*s] | Height [mAU] | Area %  |
|--------|---------------|------|-------------|--------------|--------------|---------|
| 1      | 13.862        | MM R | 0.3664      | 3077.65698   | 140.01097    | 67.0352 |
| 2      | 16.421        | MM R | 0.4901      | 1513.44849   | 51.46753     | 32.9648 |

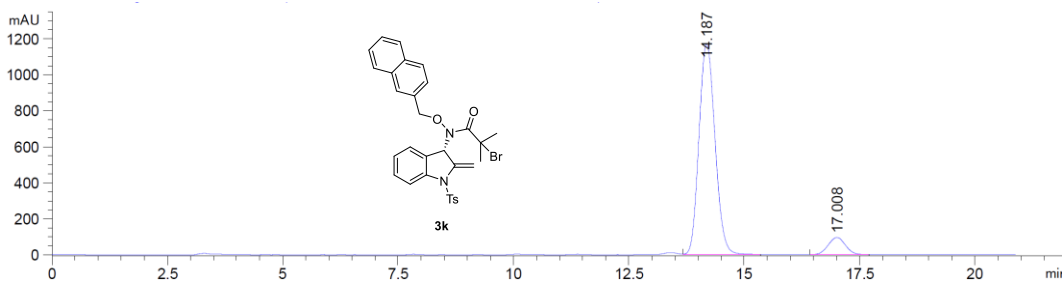

| Peak # | RetTime [min] | Type | Width [min] | Area [mAU*s] | Height [mAU] | Area %  |
|--------|---------------|------|-------------|--------------|--------------|---------|
| 1      | 14.187        | VB   | 0.3820      | 2.83257e4    | 1171.80188   | 91.8481 |
| 2      | 17.008        | BB   | 0.4112      | 2514.03613   | 95.47507     | 8.1519  |

**(S)-N-(Benzyloxy)-N-(2-methylene-1-tosylindolin-3-yl)pivalamide (3l)**

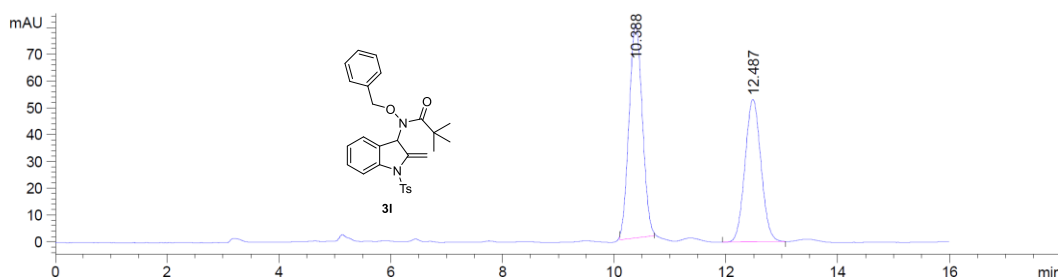

| Peak # | RetTime [min] | Type | Width [min] | Area [mAU*s] | Height [mAU] | Area %  |
|--------|---------------|------|-------------|--------------|--------------|---------|
| 1      | 10.388        | MM R | 0.2754      | 1316.23193   | 79.66525     | 55.4894 |
| 2      | 12.487        | VB   | 0.3096      | 1055.80811   | 53.19579     | 44.5106 |

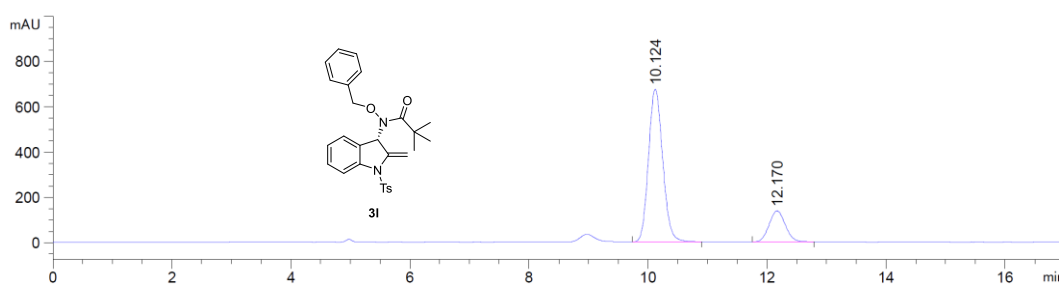

| Peak # | RetTime [min] | Type | Width [min] | Area [mAU*s] | Height [mAU] | Area %  |
|--------|---------------|------|-------------|--------------|--------------|---------|
| 1      | 10.124        | BB   | 0.2593      | 1.11789e4    | 674.64667    | 81.1440 |
| 2      | 12.170        | BB   | 0.2955      | 2597.72534   | 136.79448    | 18.8560 |

**(S)-N-(Benzyloxy)-2-bromo-2-methyl-N-(4-methyl-2-methylene-1-tosylindolin-3-yl)propanamide (3m)**

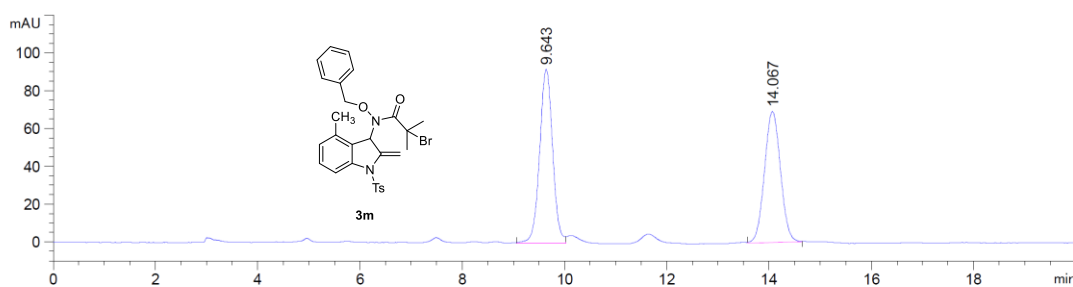

| Peak # | RetTime [min] | Type | Width [min] | Area [mAU*s] | Height [mAU] | Area %  |
|--------|---------------|------|-------------|--------------|--------------|---------|
| 1      | 9.643         | BV   | 0.2723      | 1625.68542   | 91.94367     | 51.9643 |
| 2      | 14.067        | BB   | 0.3412      | 1502.78235   | 69.24751     | 48.0357 |

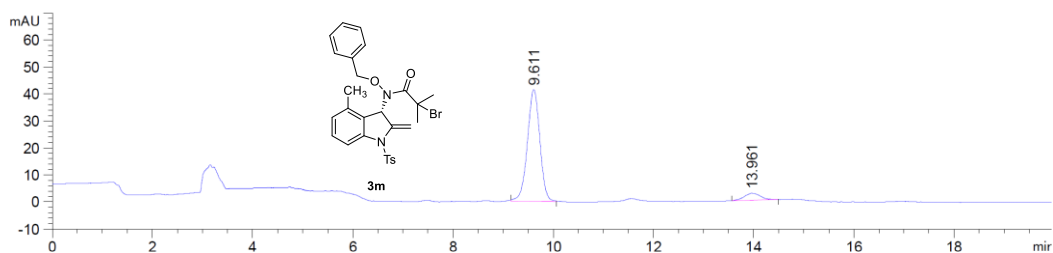

| Peak # | RetTime [min] | Type | Width [min] | Area [mAU*s] | Height [mAU] | Area %  |
|--------|---------------|------|-------------|--------------|--------------|---------|
| 1      | 9.611         | BB   | 0.2691      | 713.18854    | 41.38291     | 92.4485 |
| 2      | 13.961        | BB   | 0.2805      | 58.25528     | 2.60925      | 7.5515  |

**(S)-N-(Benzyloxy)-2-bromo-N-(5-methoxy-2-methylene-1-tosylindolin-3-yl)-2-methylpropanamide (3n)**

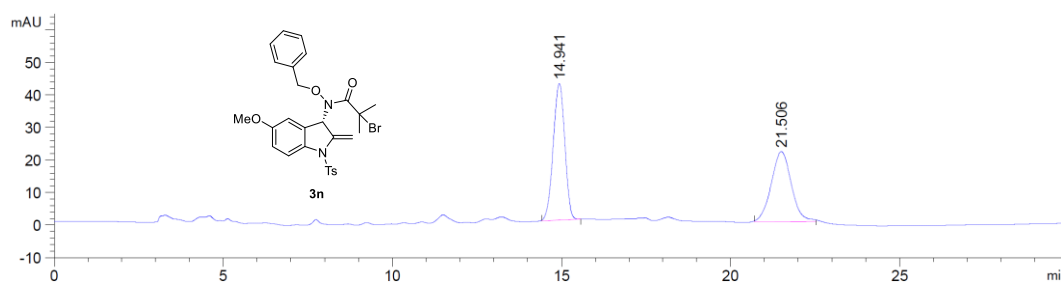

| Peak # | RetTime [min] | Type | Width [min] | Area [mAU*s] | Height [mAU] | Area %  |
|--------|---------------|------|-------------|--------------|--------------|---------|
| 1      | 14.941        | BB   | 0.3740      | 1002.66180   | 42.07535     | 52.9784 |
| 2      | 21.506        | BB   | 0.6293      | 889.92542    | 21.57003     | 47.0216 |

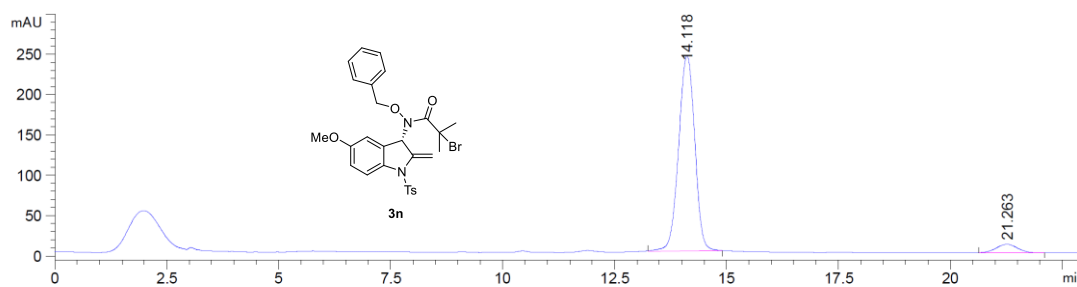

| Peak # | RetTime [min] | Type | Width [min] | Area [mAU*s] | Height [mAU] | Area %  |
|--------|---------------|------|-------------|--------------|--------------|---------|
| 1      | 14.118        | BB   | 0.3952      | 6087.05176   | 242.23648    | 94.7272 |
| 2      | 21.263        | BB   | 0.4949      | 338.82550    | 10.37760     | 5.2728  |

**(S)-N-(Benzyloxy)-2-bromo-2-methyl-N-(5-methyl-2-methylene-1-tosylindolin-3-yl)propanamide**

**uide (3o)**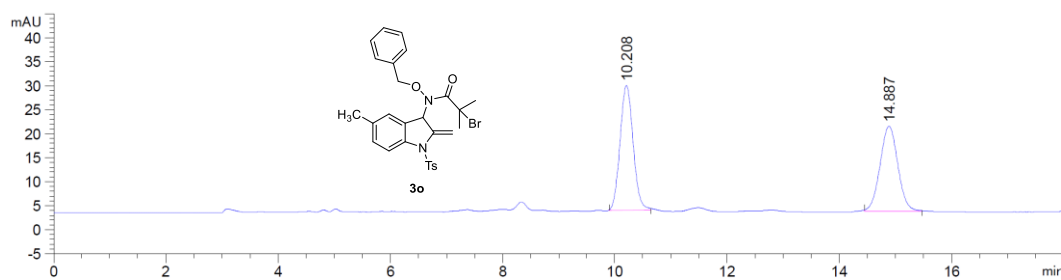

| Peak # | RetTime [min] | Type | Width [min] | Area [mAU*s] | Height [mAU] | Area %  |
|--------|---------------|------|-------------|--------------|--------------|---------|
| 1      | 10.208        | BB   | 0.2510      | 421.95193    | 26.04315     | 52.0336 |
| 2      | 14.887        | BB   | 0.3443      | 388.97043    | 17.70627     | 47.9664 |

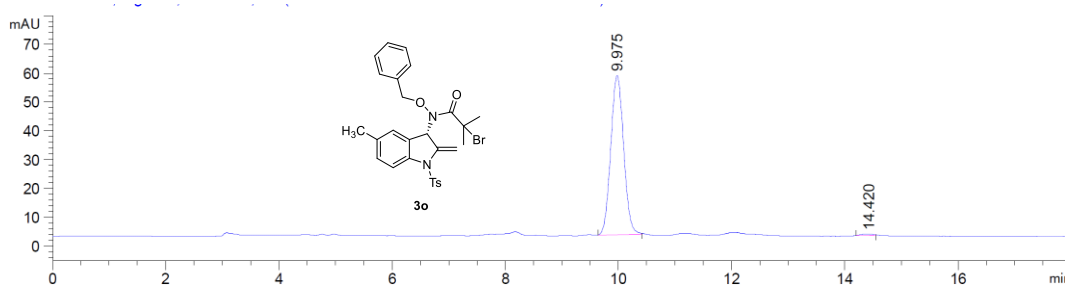

| Peak # | RetTime [min] | Type | Width [min] | Area [mAU*s] | Height [mAU] | Area %  |
|--------|---------------|------|-------------|--------------|--------------|---------|
| 1      | 9.975         | BB   | 0.2467      | 874.04199    | 55.22277     | 99.1847 |
| 2      | 14.420        | MM R | 0.2524      | 7.18452      | 4.74370e-1   | 0.8153  |

**(S)-N-(Benzyloxy)-2-bromo-N-(5-chloro-2-methylene-1-tosylindolin-3-yl)-2-methylpropanam****ide (3p)**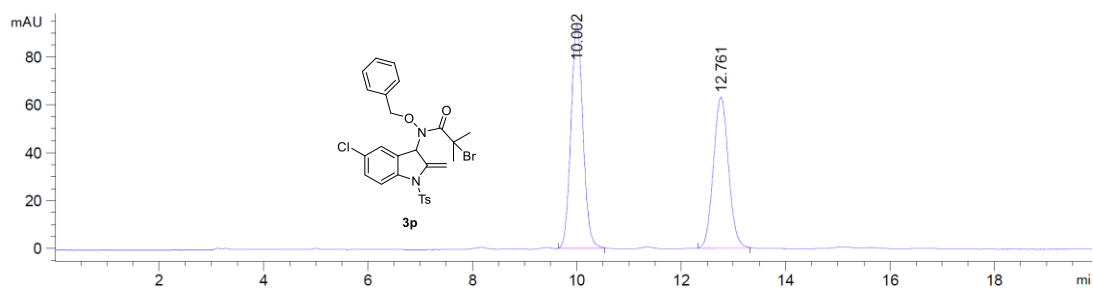

| Peak # | RetTime [min] | Type | Width [min] | Area [mAU*s] | Height [mAU] | Area %  |
|--------|---------------|------|-------------|--------------|--------------|---------|
| 1      | 10.002        | BB   | 0.2495      | 1500.86243   | 93.39989     | 54.1924 |
| 2      | 12.761        | BB   | 0.3123      | 1268.64270   | 63.16268     | 45.8076 |

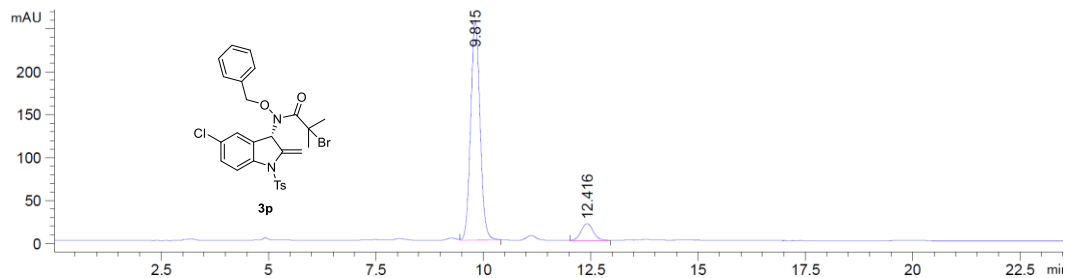

| Peak # | RetTime [min] | Type | Width [min] | Area [mAU*s] | Height [mAU] | Area %  |
|--------|---------------|------|-------------|--------------|--------------|---------|
| 1      | 9.815         | VB   | 0.2359      | 3909.23706   | 256.38995    | 91.0926 |
| 2      | 12.416        | BB   | 0.3079      | 382.26205    | 19.56794     | 8.9074  |

**(S)-N-(Benzyloxy)-2-bromo-N-(5-bromo-2-methylene-1-tosylindolin-3-yl)-2-methylpropanamide (3q)**

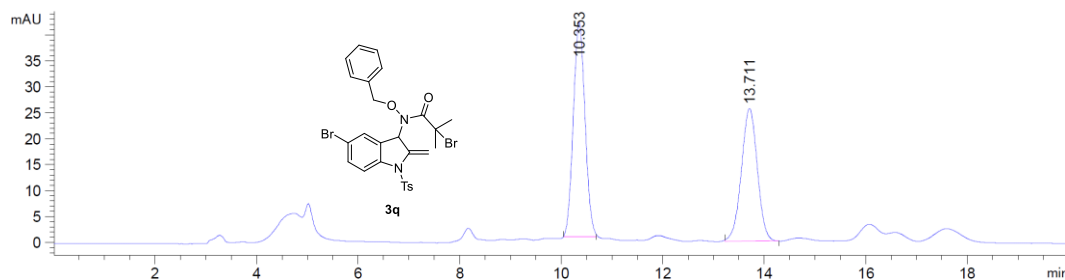

| Peak # | RetTime [min] | Type | Width [min] | Area [mAU*s] | Height [mAU] | Area %  |
|--------|---------------|------|-------------|--------------|--------------|---------|
| 1      | 10.353        | MM R | 0.2670      | 662.40021    | 41.34211     | 54.2298 |
| 2      | 13.711        | BB   | 0.3389      | 559.06885    | 25.59157     | 45.7702 |

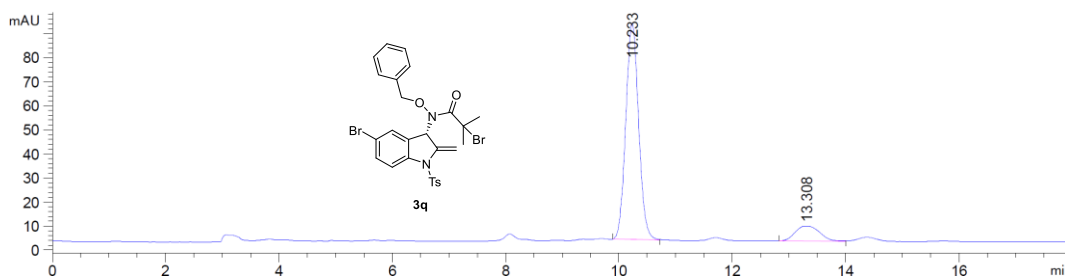

| Peak # | RetTime [min] | Type | Width [min] | Area [mAU*s] | Height [mAU] | Area %  |
|--------|---------------|------|-------------|--------------|--------------|---------|
| 1      | 10.233        | BB   | 0.2459      | 1415.69299   | 89.81912     | 88.4761 |
| 2      | 13.308        | BV   | 0.4736      | 184.39308    | 6.26146      | 11.5239 |

**(S)-N-(Benzyloxy)-2-bromo-N-(6-fluoro-2-methylene-1-tosylindolin-3-yl)-2-methylpropanamide (3r)**

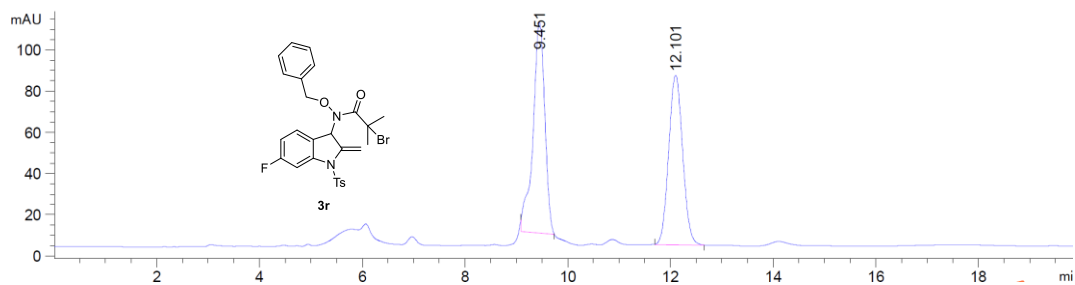

| Peak # | RetTime [min] | Type | Width [min] | Area [mAU*s] | Height [mAU] | Area %  |
|--------|---------------|------|-------------|--------------|--------------|---------|
| 1      | 9.451         | MM R | 0.2670      | 1638.99817   | 102.29605    | 51.2674 |
| 2      | 12.101        | BB   | 0.2967      | 1557.96057   | 82.36938     | 48.7326 |

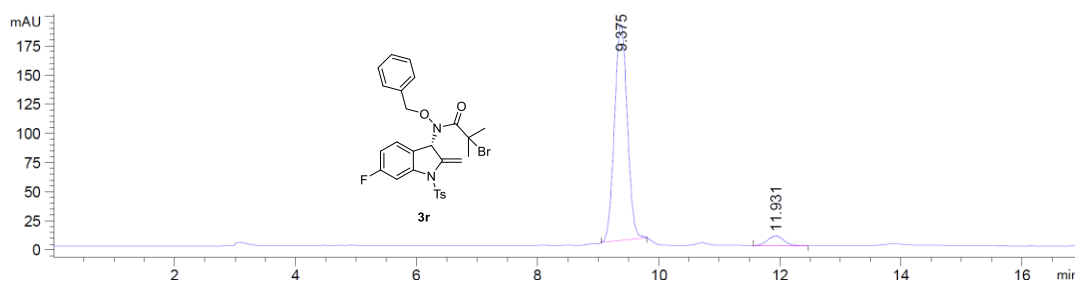

| Peak # | RetTime [min] | Type | Width [min] | Area [mAU*s] | Height [mAU] | Area %  |
|--------|---------------|------|-------------|--------------|--------------|---------|
| 1      | 9.375         | MM R | 0.2450      | 2720.31006   | 185.08128    | 94.7709 |
| 2      | 11.931        | BB   | 0.2944      | 150.09769    | 8.16783      | 5.2291  |

**(S)-N-(Benzyloxy)-2-bromo-N-(6-chloro-2-methylene-1-tosylindolin-3-yl)-2-methylpropanamide (3s)**



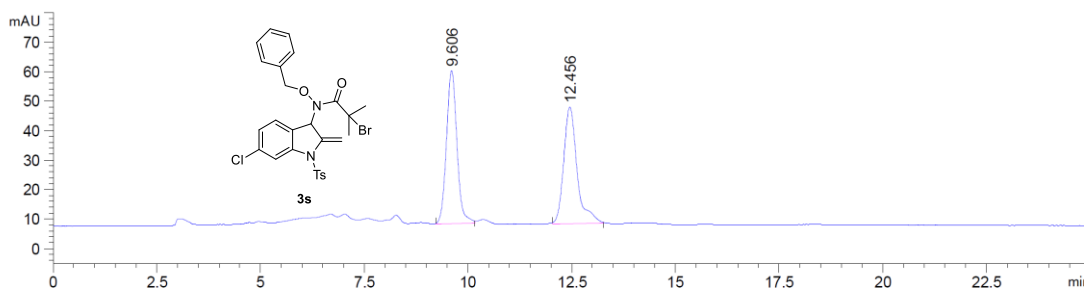

| Peak # | RetTime [min] | Type | Width [min] | Area [mAU*s] | Height [mAU] | Area %  |
|--------|---------------|------|-------------|--------------|--------------|---------|
| 1      | 9.606         | BB   | 0.2714      | 912.21417    | 51.81789     | 50.6501 |
| 2      | 12.456        | BB   | 0.3446      | 888.79614    | 39.48841     | 49.3499 |

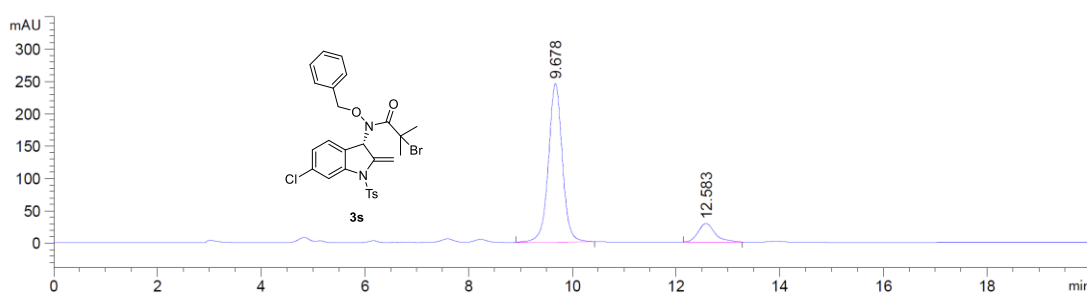

| Peak # | RetTime [min] | Type | Width [min] | Area [mAU*s] | Height [mAU] | Area %  |
|--------|---------------|------|-------------|--------------|--------------|---------|
| 1      | 9.678         | BB   | 0.2863      | 4580.90283   | 244.81471    | 87.3332 |
| 2      | 12.583        | BB   | 0.3508      | 664.41327    | 28.84024     | 12.6668 |

**(S)-N-((3-Methylbenzyl)oxy)-N-(2-methylene-1-tosylindolin-3-yl)pivalamide (3u)**

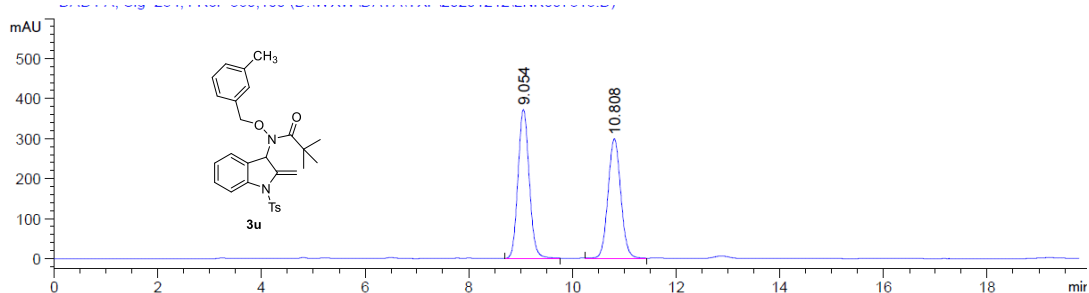

| Peak # | RetTime [min] | Type | Width [min] | Area [mAU*s] | Height [mAU] | Area %  |
|--------|---------------|------|-------------|--------------|--------------|---------|
| 1      | 9.054         | BB   | 0.2333      | 5599.49414   | 372.61108    | 52.3129 |
| 2      | 10.808        | BB   | 0.2654      | 5104.35303   | 298.66144    | 47.6871 |

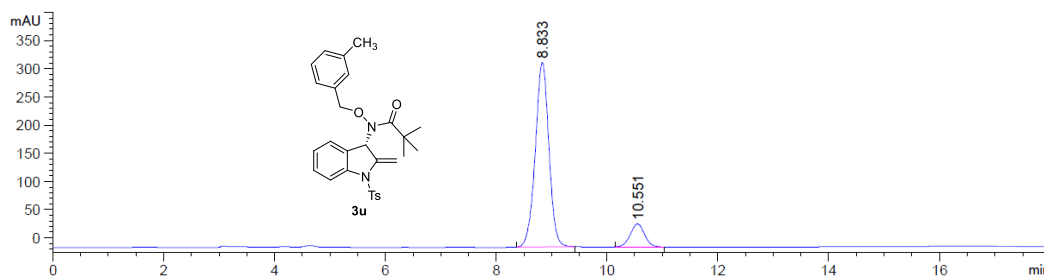

| Peak # | RetTime [min] | Type | Width [min] | Area [mAU*s] | Height [mAU] | Area %  |
|--------|---------------|------|-------------|--------------|--------------|---------|
| 1      | 8.833         | BB   | 0.2608      | 5590.16211   | 327.99994    | 88.2302 |
| 2      | 10.551        | BB   | 0.2786      | 745.72083    | 41.31083     | 11.7698 |

***N*-(Benzyloxy)-2-bromo-*N*-((*S*)-2-methylene-1-tosylindolin-3-yl)propenamide (3v)**

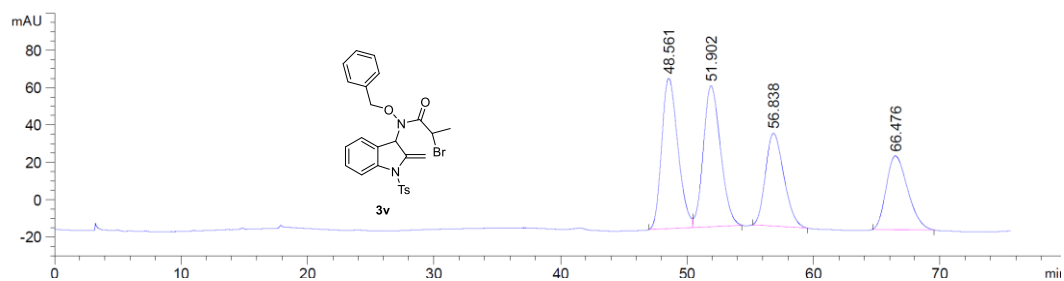

| Peak # | RetTime [min] | Type | Width [min] | Area [mAU*s] | Height [mAU] | Area %  |
|--------|---------------|------|-------------|--------------|--------------|---------|
| 1      | 48.561        | BV   | 1.3520      | 7184.48828   | 80.59789     | 29.8297 |
| 2      | 51.902        | VB   | 1.4194      | 7180.43115   | 75.50776     | 29.8129 |
| 3      | 56.838        | BB   | 1.4960      | 5043.99756   | 49.78362     | 20.9425 |
| 4      | 66.476        | BB   | 1.6305      | 4676.09229   | 39.57655     | 19.4149 |

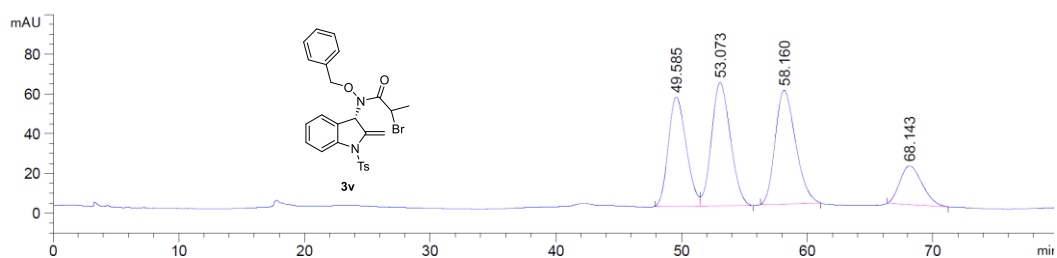

| Peak # | RetTime [min] | Type | Width [min] | Area [mAU*s] | Height [mAU] | Area %  |
|--------|---------------|------|-------------|--------------|--------------|---------|
| 1      | 49.585        | BV   | 1.4793      | 5441.13623   | 54.94875     | 26.1031 |
| 2      | 53.073        | VB   | 1.5901      | 6501.86377   | 62.07016     | 31.1918 |
| 3      | 58.160        | BB   | 1.6703      | 6488.75488   | 57.25082     | 31.1289 |
| 4      | 68.143        | BB   | 1.4678      | 2413.05347   | 19.49924     | 11.5763 |

### 2-Bromo-2-methyl-N-(2-methyl-1-tosylindolin-3-yl)propenamide (4a)

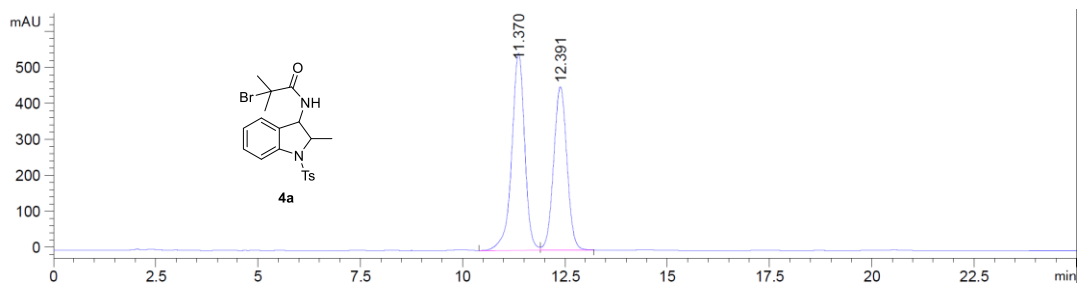

| Peak # | RetTime [min] | Type | Width [min] | Area [mAU*s] | Height [mAU] | Area %  |
|--------|---------------|------|-------------|--------------|--------------|---------|
| 1      | 11.370        | VV   | 0.3351      | 1.21004e4    | 548.98981    | 53.9593 |
| 2      | 12.391        | VB   | 0.3549      | 1.03246e4    | 454.67355    | 46.0407 |

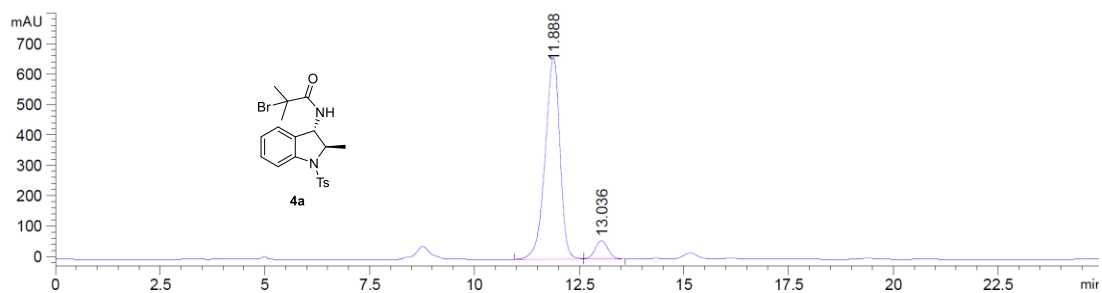

| Peak # | RetTime [min] | Type | Width [min] | Area [mAU*s] | Height [mAU] | Area %  |
|--------|---------------|------|-------------|--------------|--------------|---------|
| 1      | 11.888        | BB   | 0.3783      | 1.62919e4    | 663.86310    | 92.6449 |
| 2      | 13.036        | BB   | 0.3329      | 1293.42920   | 60.63161     | 7.3551  |

## 10. References

1. (a) Wang, Q.; Li, T.-R.; Lu, L.-Q.; Li, M.-M.; Zhang, K.; Xiao, W.-J. *J. Am. Chem. Soc.*, **2016**, *138*,

---

8360–8363; (b) Li, T.-R.; Cheng, B.-Y.; Wang, Y.-N.; Zhang, M.-M.; Lu, L.-Q.; Xiao, W.-J., *Angew. Chem. Int. Ed.*, **2016**, *55*, 12422–12426.

2. (a) Shen, J.; Woodward, R.; Kedenburg, J. P.; Liu, X.; Chen, M.; Fang, L.; Sun, D.; Wang, P. G.; *J. Med. Chem.*, **2008**, *51*, 7417–7427; (b) Jeffrey, C. S.; Barnes, K. L.; Eickhoff, J. A.; Carson, C. R., *J. Am. Chem. Soc.*, **2011**, *133*, 7688–7691; (c) Kang, D.; Zhang, H.; Zhou, Z.; Huang, B.; Naesens, L.; Zhan, P.; Liu, X., *Bioorg. Med. Chem. Lett.* **2016**, *26*, 5182–5186.
